# Supplementary material for: Integrative Analysis of Expression Profiles of mRNA and MicroRNA Provides Insights of Cotton Response to Verticillium dahliae
Source: MDPI journal article supplement (doi:10.3390/ijms23094702), 2022-04-24
Supplement: s1 [file s1]

**Table S1** Summary of transcriptome sequencing results after filtering

| Sample     | Clean reads | Mapping rate(%) | Effective rate(%) | Q30(%) |
|------------|-------------|-----------------|-------------------|--------|
| J11 mock-1 | 18,919,087  | 89.34           | 93.16             | 92.43  |
| J11 mock-2 | 18,613,300  | 89.37           | 93.28             | 93.62  |
| J11 mock-3 | 19,327,874  | 88.90           | 95.09             | 92.41  |
| J11 24h-1  | 20,125,921  | 74.01           | 93.43             | 92.56  |
| J11 24h-2  | 20,901,469  | 79.65           | 94.74             | 92.59  |
| J11 24h-3  | 21,810,013  | 73.62           | 94.30             | 92.11  |
| Z2 mock-1  | 20,137,350  | 94.79           | 93.74             | 92.27  |
| Z2 mock-2  | 22,658,917  | 93.43           | 92.15             | 92.28  |
| Z2 mock-3  | 21,816,358  | 95.20           | 94.11             | 92.38  |
| Z2 24h-1   | 24,645,435  | 77.93           | 95.16             | 92.64  |
| Z2 24h-2   | 24,087,659  | 76.05           | 94.95             | 92.37  |
| Z2 24h-3   | 21,823,327  | 79.84           | 95.03             | 92.41  |
