# Supplementary material for: Integrative Analysis of Expression Profiles of mRNA and MicroRNA Provides Insights of Cotton Response to Verticillium dahliae
Source: MDPI journal article supplement (doi:10.3390/ijms23094702), 2022-04-24
Supplement: s1 [file s1]

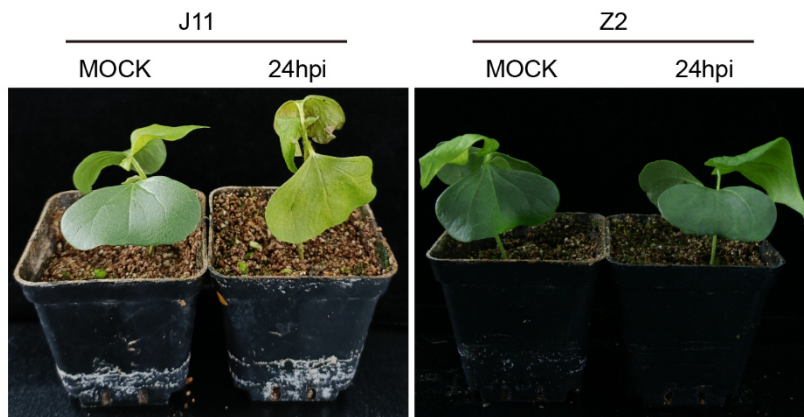

**Figure S1.** Phenotypes of J11 and Z2 after 20 days inoculation with *V.dahliae*.

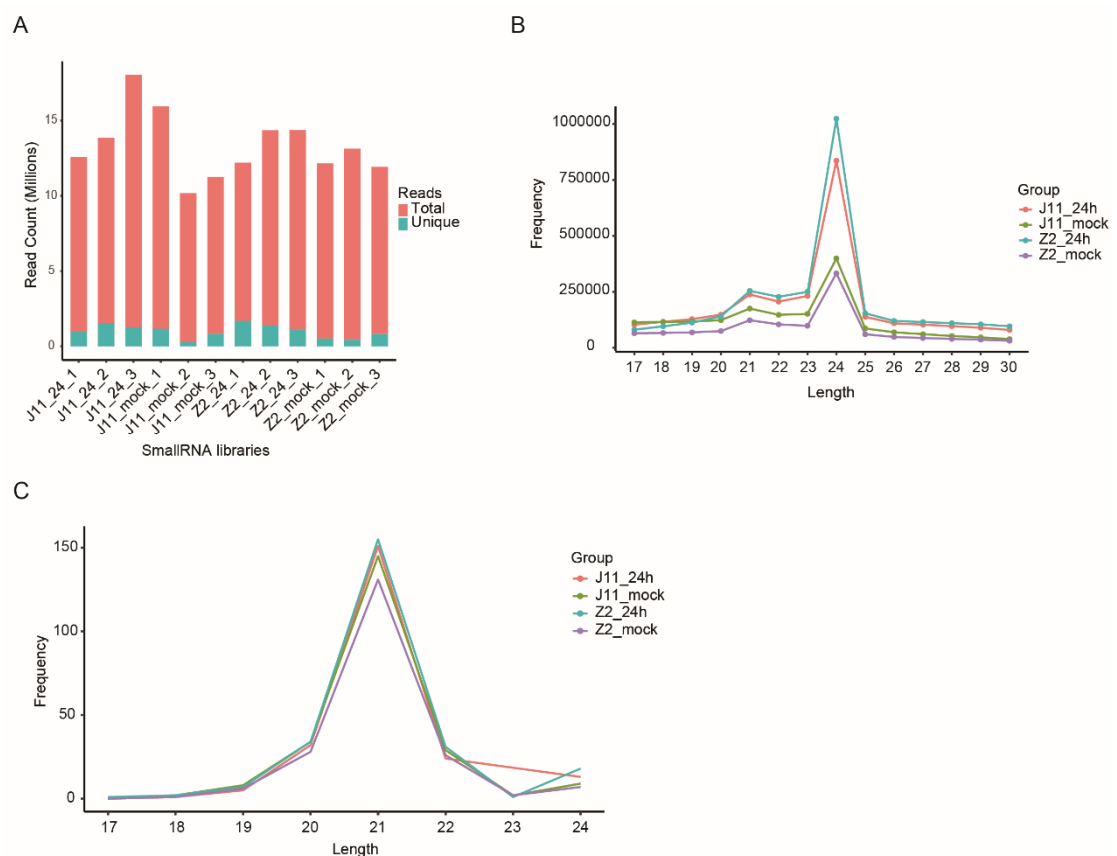

**Figure S2.** Cotton small RNA reads distributions. **(A).** Pre-processed reads distribution of small RNA libraries. **(B).** Length distributions of unique small RNAs in J11 and Z2. **(C).** The frequency distribution of miRNAs in J11 and Z2.

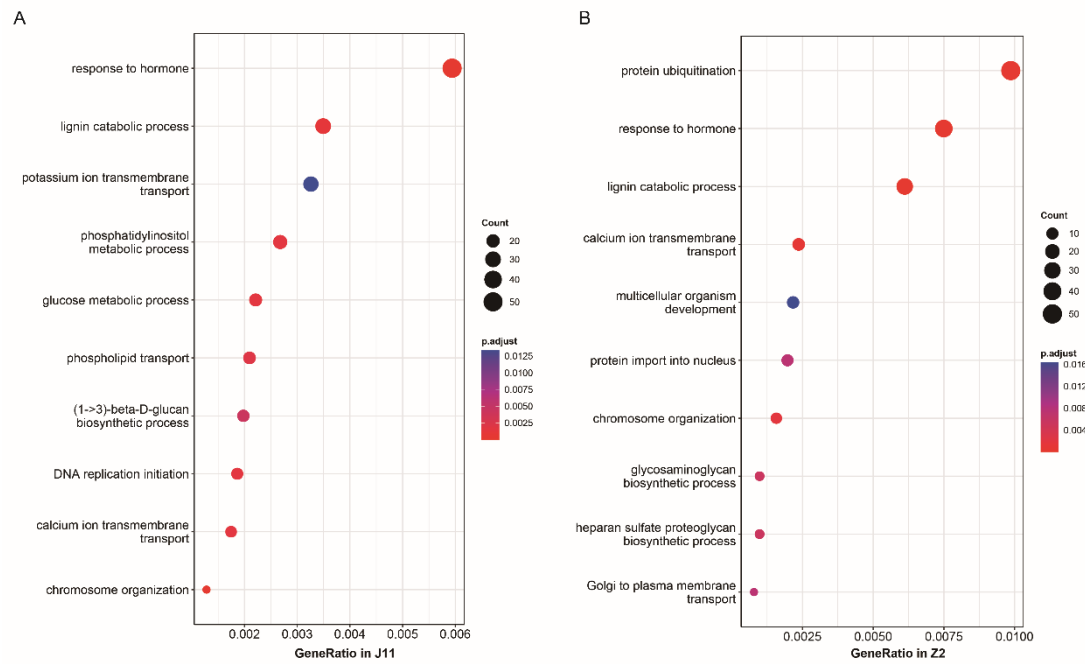

**Figure S3.** GO enrichment analysis of target unigenes of DEMs in J11 (A) and Z2 (B).

A

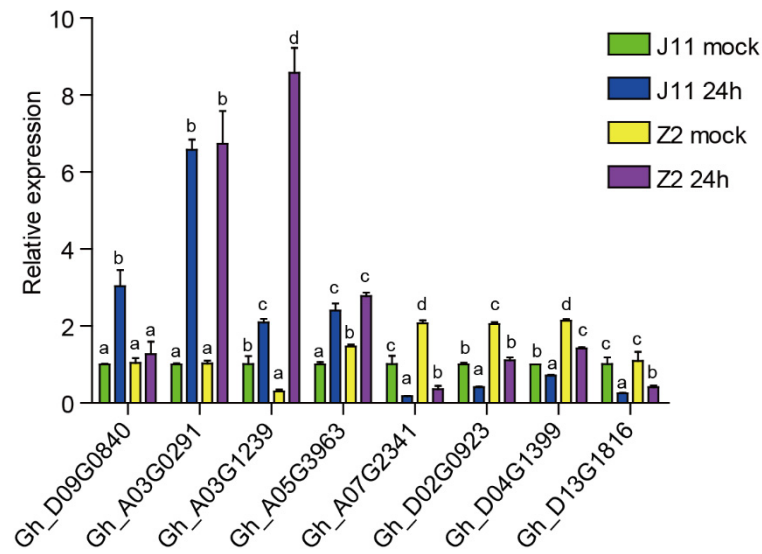

B

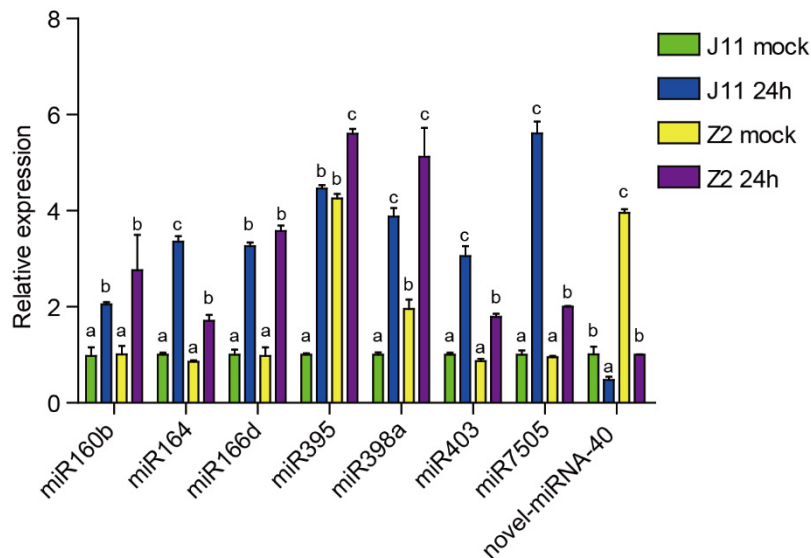

**Figure S4.** Quantitative real-time PCR (qRT-PCR) validation of selected unigenes and miRNAs. **(A)** qRT-PCR was performed to determine the expression levels of 8 unigenes relative to GhUBQ7. **(B)** The expression of 7 known miRNAs and 1 novel miRNA was verified by stem-loop qRT-PCR with U6 snRNA as an internal reference gene and data are means  $\pm$  SD from three biological replicates. Different letters indicate significant differences,  $p < 0.05$  (ANOVA test).
