# Supplementary material for: Integrative Analysis of Expression Profiles of mRNA and MicroRNA Provides Insights of Cotton Response to Verticillium dahliae
Source: Int J Mol Sci. 2022 Apr 24;23(9):4702. doi: 10.3390/ijms23094702 (PMC9099760; doi:10.3390/ijms23094702)
Supplement: Supplementary file 1 [file ijms-23-04702-s001.zip]

Archive with 7 entries (7 files):
- Supplementary Figures.pdf
- Table S1.Summary of transcriptome sequencing results after filtering.pdf
- Table S2.Overview of DEGs shared between J11 and Z2.xlsx
- Table S3.WRKY genes differentially expressed in J11 and Z2.xlsx
- Table S4.All the miRNAs and DEMs identified in J11 and Z2.xlsx
- Table S5.DEMs and their corresponding targets extracted from RNA sequencing for network in J11 and Z2.xlsx
- Table S6.Primers used in this work.xlsx
