# Supplementary material for: Integrative Analysis of Expression Profiles of mRNA and MicroRNA Provides Insights of Cotton Response to Verticillium dahliae
Source: Int J Mol Sci. 2022 Apr 24;23(9):4702. doi: 10.3390/ijms23094702 (PMC9099760; doi:10.3390/ijms23094702)
Supplement: Supplementary file 1 [file ijms-23-04702-s001.zip › Table S2.Overview of DEGs shared between J11 and Z2.xlsx]

## Sheet: J11_Z2_all_up
Gene_ID	J11_baseMean	J11_log2FoldChange	J11_lfcSE	j11_stat	J11_pvalue	J11_padj	Z2_baseMean	Z2_log2FoldChange	Z2_lfcSE	Z2_stat	Z2_pvalue	Z2_padj
Gh_A01G0019	105.003	6.96623	0.686514	10.1473	3.40826e-24	3.13813e-22	72.1857	2.69931	0.851405	3.17042	0.0015222	0.0320891
Gh_A01G0133	21.2102	4.61221	0.814569	5.66214	1.49494e-08	2.81191e-07	16.6894	2.65158	0.670217	3.9563	7.61207e-05	0.00314695
Gh_A01G0229	81.3024	2.10431	0.268001	7.8519	4.09776e-15	1.72824e-13	77.9956	1.15311	0.288113	4.0023	6.27308e-05	0.00269569
Gh_A01G0245	15.4456	6.41729	1.28255	5.00355	5.62832e-07	7.99798e-06	5.18875	4.84023	1.55738	3.10792	0.00188407	0.0375728
Gh_A01G0249	7.91813	6.42495	1.34719	4.76916	1.84997e-06	2.38342e-05	8.53003	5.5656	1.36818	4.06788	4.74437e-05	0.0021557
Gh_A01G0417	30.6751	2.88231	0.45119	6.38824	1.67809e-10	4.17011e-09	41.8187	3.07194	0.472969	6.49501	8.30296e-11	2.17948e-08
Gh_A01G0495	16.9821	3.36861	0.73174	4.60356	4.15333e-06	4.95721e-05	21.8727	1.71898	0.544862	3.15489	0.00160556	0.033458
Gh_A01G0535	20.3359	1.3713	0.468708	2.92571	0.00343672	0.0173086	23.2369	2.62587	0.58228	4.50963	6.49417e-06	0.000413709
Gh_A01G0536	8.87417	1.93208	0.75494	2.55925	0.0104898	0.0429851	7.65385	3.05619	0.985945	3.09976	0.00193677	0.0383604
Gh_A01G0574	700.571	2.24829	0.142521	15.7751	4.61348e-56	1.92938e-53	582.582	1.74669	0.245826	7.1054	1.19977e-12	4.66776e-10
Gh_A01G0670	104.779	2.15471	0.237367	9.07755	1.11043e-19	7.19095e-18	51.7807	1.83651	0.404745	4.53744	5.694e-06	0.000369762
Gh_A01G0820	25.0803	3.66548	0.626751	5.84839	4.96352e-09	1.01234e-07	23.2269	2.05508	0.600808	3.42054	0.000624978	0.0164648
Gh_A01G0842	15.7156	3.06651	0.648815	4.72632	2.28621e-06	2.88017e-05	12.9294	3.36735	0.798799	4.21551	2.49214e-05	0.00128209
Gh_A01G0870	8.14516	2.34468	0.803776	2.91708	0.00353324	0.0176951	7.22127	3.75873	1.12399	3.3441	0.000825488	0.0203334
Gh_A01G0875	63.4367	2.28053	0.315779	7.2219	5.12668e-13	1.7419e-11	181.899	5.43464	0.407626	13.3324	1.49964e-40	1.30691e-36
Gh_A01G0912	20.7519	2.46693	0.594835	4.14726	3.36485e-05	0.000320294	20.3051	1.92301	0.633302	3.03648	0.00239354	0.044571
Gh_A01G0948	12.3969	5.18495	1.16897	4.43548	9.18682e-06	0.000101179	13.3072	3.21365	0.780416	4.11786	3.82399e-05	0.00181116
Gh_A01G1075	4.26692	5.5383	1.48923	3.71891	0.000200087	0.00153681	6.22829	3.54921	1.18497	2.99519	0.00274271	0.0493235
Gh_A01G1202	26.5698	1.99112	0.448261	4.44189	8.91729e-06	9.85018e-05	31.1961	1.53194	0.472878	3.23961	0.00119694	0.0267465
Gh_A01G1397	24.1766	1.39502	0.432145	3.22813	0.00124601	0.00741048	37.9398	1.42673	0.470445	3.03271	0.00242366	0.0449589
Gh_A01G1410	150.75	2.55753	0.217864	11.7391	8.03453e-32	1.19445e-29	107.699	1.59705	0.281157	5.68028	1.34476e-08	2.07055e-06
Gh_A01G1439	24.5506	2.15077	0.483057	4.4524	8.49146e-06	9.44274e-05	29.3218	2.32889	0.510993	4.55757	5.17483e-06	0.000341649
Gh_A01G1487	13.9195	3.44615	0.723257	4.76476	1.89077e-06	2.42708e-05	10.7761	6.89519	1.35417	5.09182	3.54634e-07	3.56077e-05
Gh_A01G1637	16.687	4.58568	0.876659	5.23086	1.68725e-07	2.6307e-06	10.9694	3.05778	0.980545	3.11845	0.00181803	0.0366076
Gh_A01G1931	35.5861	3.53455	0.492962	7.17003	7.49806e-13	2.50204e-11	34.4028	4.15551	0.630874	6.58691	4.49074e-11	1.24637e-08
Gh_A01G2041	27.1115	1.42771	0.422781	3.37694	0.000732968	0.00469158	26.5346	1.46356	0.476439	3.07187	0.00212721	0.0409023
Gh_A01G2122	613.95	1.36266	0.133282	10.2238	1.55083e-24	1.47338e-22	639.513	1.27656	0.245772	5.19408	2.05739e-07	2.26958e-05
Gh_A02G0174	28.8915	2.09237	0.440892	4.74576	2.07722e-06	2.64141e-05	30.4346	1.7369	0.473785	3.666	0.000246374	0.00795683
Gh_A02G0314	35.6917	4.88775	0.646353	7.56205	3.96775e-14	1.51621e-12	18.3783	2.04679	0.644305	3.17675	0.00148935	0.0315493
Gh_A02G0324	11.578	1.63125	0.635602	2.56647	0.0102739	0.0422325	19.5497	1.62535	0.538804	3.01658	0.00255645	0.0467259
Gh_A02G0517	23.6907	1.54431	0.511318	3.02025	0.00252568	0.0134004	21.1393	2.53808	0.591239	4.29282	1.76415e-05	0.000962091
Gh_A02G0686	15.7302	2.92744	0.63591	4.60354	4.15373e-06	4.95721e-05	25.4217	1.87277	0.50466	3.71095	0.000206483	0.00694234
Gh_A02G0687	13.7946	3.66701	0.771756	4.75151	2.019e-06	2.57544e-05	15.7747	3.66965	0.763578	4.80586	1.54085e-06	0.000124457
Gh_A02G0741	6.66145	6.18032	1.37755	4.48646	7.24152e-06	8.19533e-05	4.07211	5.49415	1.58042	3.47638	0.000508223	0.0140072
Gh_A02G0819	12.5145	2.26274	0.666607	3.39441	0.000687757	0.00445488	10.2493	2.99906	0.854993	3.5077	0.000452003	0.0127068
Gh_A02G0821	121.819	2.12809	0.222369	9.57007	1.06829e-21	8.18561e-20	119.324	1.47795	0.28549	5.17689	2.25617e-07	2.44642e-05
Gh_A02G0866	8.14086	2.82628	0.863462	3.2732	0.00106339	0.00647319	7.48439	3.03731	0.985291	3.08266	0.00205162	0.0400705
Gh_A02G1058	8.38575	2.39203	0.798741	2.99475	0.00274672	0.0143855	14.9233	3.39853	0.846625	4.0142	5.96468e-05	0.00258869
Gh_A02G1122	21.6556	3.17119	0.616004	5.14801	2.63271e-07	3.96795e-06	14.9894	2.57991	0.742888	3.47282	0.00051503	0.0141411
Gh_A02G1198	38.4532	4.62288	0.584585	7.90797	2.61621e-15	1.12243e-13	24.1546	2.69447	0.698161	3.85938	0.000113676	0.00432009
Gh_A02G1219	17.2821	2.93369	0.619632	4.73457	2.19517e-06	2.77485e-05	15.4763	4.16987	0.835456	4.99113	6.00282e-07	5.55344e-05
Gh_A02G1268	92.0877	2.03048	0.293735	6.91261	4.75825e-12	1.43769e-10	97.5773	1.20878	0.300265	4.02571	5.68042e-05	0.00248015
Gh_A02G1313	48.9425	2.38996	0.357976	6.6763	2.45058e-11	6.74823e-10	104.157	1.58101	0.313702	5.03983	4.65935e-07	4.48182e-05
Gh_A02G1634	9.02021	6.61801	1.34847	4.90778	9.21114e-07	1.26126e-05	5.72982	4.98606	1.48629	3.3547	0.000794514	0.0197266
Gh_A02G1638	19.1255	1.30645	0.486672	2.68446	0.0072648	0.0319966	13.3417	3.42657	0.849158	4.03525	5.45433e-05	0.00239342
Gh_A02G1696	13.4665	7.19319	1.73667	4.14193	3.44389e-05	0.000326823	8.48391	4.65719	1.39473	3.33913	0.000840409	0.0206426
Gh_A02G1701	58.3152	3.31121	0.39012	8.48767	2.10821e-17	1.11643e-15	22.035	2.06585	0.614041	3.36435	0.000767232	0.0192356
Gh_A02G1778	22.8496	2.81823	0.531946	5.29795	1.17107e-07	1.88027e-06	19.7066	1.85847	0.603227	3.08087	0.00206395	0.0402198
Gh_A03G0096	6.16355	5.06686	1.4595	3.47165	0.000517267	0.00350866	6.84272	3.66339	1.13493	3.22787	0.00124718	0.0275301
Gh_A03G0124	21.6543	3.57958	0.611526	5.85352	4.81284e-09	9.84872e-08	32.3588	1.9443	0.48507	4.0083	6.11581e-05	0.00264638
Gh_A03G0138	129.723	2.75847	0.242229	11.3878	4.80718e-30	6.32681e-28	108.365	2.11749	0.332457	6.36923	1.8998e-10	4.49901e-08
Gh_A03G0139	257.777	1.01017	0.157935	6.39611	1.59388e-10	3.98451e-09	180.986	1.17068	0.234154	4.99963	5.74415e-07	5.3482e-05
Gh_A03G0266	6.777	3.66052	1.10954	3.29914	0.000969829	0.00597109	7.81735	2.79458	0.919356	3.03972	0.00236802	0.0442091
Gh_A03G0291	225.921	2.40285	0.185028	12.9864	1.46144e-38	3.09936e-36	152.09	2.15116	0.270775	7.94444	1.95064e-15	1.26862e-12
Gh_A03G0370	48.6416	1.68718	0.321574	5.24664	1.54898e-07	2.43121e-06	23.2496	1.68495	0.521653	3.23003	0.00123778	0.0274244
Gh_A03G0657	15.7143	1.55598	0.59168	2.62977	0.00854424	0.0363785	24.5671	2.26586	0.557517	4.06419	4.8199e-05	0.00217866
Gh_A03G0737	15.641	7.41349	1.30313	5.689	1.27788e-08	2.42607e-07	8.4226	5.54542	1.36964	4.0488	5.14812e-05	0.00229605
Gh_A03G0775	24.1851	3.01637	0.575455	5.2417	1.59101e-07	2.49106e-06	22.4236	2.33939	0.678267	3.44907	0.000562528	0.0151213
Gh_A03G0977	92.4257	1.74498	0.248682	7.01693	2.26799e-12	7.08716e-11	59.8724	1.05013	0.325233	3.22885	0.00124289	0.0274912
Gh_A03G1035	6.1663	6.06978	1.39645	4.34657	1.3828e-05	0.000145014	10.1804	3.24214	0.965285	3.35874	0.000782983	0.0195293
Gh_A03G1095	30.262	2.57	0.473858	5.42357	5.84215e-08	9.9401e-07	29.2975	1.40494	0.440484	3.18954	0.00142497	0.030572
Gh_A03G1114	42.8917	2.40144	0.373796	6.42448	1.32325e-10	3.35104e-09	42.5414	1.37338	0.405493	3.38693	0.000706798	0.018
Gh_A03G1224	19.5853	5.85558	1.13832	5.14404	2.6889e-07	4.03904e-06	9.86456	3.20001	0.986676	3.24322	0.00118185	0.0264635
Gh_A03G1231	492.251	1.06777	0.150466	7.09645	1.27998e-12	4.11471e-11	454.704	1.03076	0.254769	4.04586	5.2131e-05	0.00231555
Gh_A03G1239	25.7361	4.19895	0.640907	6.55157	5.69361e-11	1.50311e-09	77.9392	2.08268	0.37621	5.53597	3.09518e-08	4.37887e-06
Gh_A03G1356	48.4769	3.29226	0.402201	8.18559	2.70962e-16	1.29264e-14	36.5304	4.74987	0.650072	7.30669	2.73813e-13	1.24354e-10
Gh_A03G1378	16.3865	4.22335	0.88145	4.79136	1.65653e-06	2.15734e-05	6.7236	5.22115	1.43468	3.63923	0.000273451	0.00865313
Gh_A03G1527	667.721	1.38451	0.118674	11.6665	1.8903e-31	2.73744e-29	355.634	2.09051	0.309262	6.75967	1.38302e-11	4.26887e-09
Gh_A03G1550	19.426	3.75965	0.696981	5.39419	6.88316e-08	1.15749e-06	12.9932	3.61794	0.896493	4.03566	5.44485e-05	0.00239167
Gh_A03G1683	57.7151	3.81228	0.455247	8.37408	5.56573e-17	2.84309e-15	39.1405	3.15576	0.558069	5.65478	1.56049e-08	2.36923e-06
Gh_A03G1704	3.44274	5.21932	1.53733	3.39507	0.000686122	0.00444707	5.58031	4.94672	1.49036	3.31914	0.000902964	0.0217873
Gh_A03G1885	27.244	5.315	0.853141	6.22992	4.66663e-10	1.09676e-08	22.8468	3.40521	0.711397	4.78665	1.6959e-06	0.000134603
Gh_A03G1925	97.7098	2.15263	0.315974	6.81267	9.58021e-12	2.79827e-10	99.6906	1.29942	0.354458	3.66593	0.000246437	0.00795683
Gh_A03G1930	10.8306	2.00463	0.786023	2.55034	0.0107617	0.0438263	10.5136	3.93002	1.01696	3.86448	0.000111327	0.00424779
Gh_A03G1988	35.7395	1.67876	0.387585	4.33134	1.48205e-05	0.000154301	16.431	5.02047	0.999251	5.02424	5.05435e-07	4.812e-05
Gh_A03G2043	116.69	7.11832	0.693779	10.2602	1.0647e-24	1.02901e-22	111.167	3.28194	0.832208	3.94365	8.02492e-05	0.00328954
Gh_A03G2061	100.928	1.25143	0.241358	5.18493	2.16092e-07	3.30475e-06	86.0831	1.48354	0.287961	5.15189	2.57869e-07	2.72728e-05
Gh_A03G2106	450.085	1.82059	0.145126	12.5449	4.24136e-36	7.50167e-34	538.284	2.20729	0.207479	10.6386	1.96986e-26	5.36466e-23
Gh_A03G2150	119.608	1.3831	0.224736	6.15434	7.53907e-10	1.72122e-08	93.7044	1.52371	0.346514	4.39724	1.09635e-05	0.000639524
Gh_A04G0014	9.30482	6.65973	2.20589	3.01907	0.00253554	0.0134432	3.66378	5.34567	1.6679	3.20504	0.00135043	0.0293047
Gh_A04G0020	5.04954	3.81444	1.30927	2.91342	0.00357493	0.0178739	7.23248	6.31727	1.40652	4.49143	7.07472e-06	0.000441021
Gh_A04G0076	17.2923	4.02816	0.753661	5.34479	9.0522e-08	1.48813e-06	10.5523	2.99791	0.907715	3.3027	0.000957594	0.0228637
Gh_A04G0372	64.8107	1.11069	0.277168	4.00729	6.14194e-05	0.00054575	107.113	1.14946	0.280964	4.09112	4.29292e-05	0.00198786
Gh_A04G0373	41.1485	1.57001	0.370858	4.23345	2.3013e-05	0.000228689	71.6355	1.09927	0.33311	3.30003	0.000966747	0.0230317
Gh_A04G0708	21.609	4.6357	0.789277	5.87335	4.27086e-09	8.80702e-08	16.5088	5.62411	1.19052	4.72408	2.31154e-06	0.000171816
Gh_A04G0723	19.8767	2.22633	0.518959	4.28999	1.78678e-05	0.000182754	11.6747	2.63071	0.776462	3.38808	0.000703844	0.0179563
Gh_A04G0738	85.5972	3.31184	0.329109	10.0631	8.04597e-24	7.21526e-22	102.105	1.65589	0.35633	4.64707	3.36684e-06	0.0002404
Gh_A04G0743	21.0305	2.23678	0.521969	4.28527	1.82515e-05	0.000186295	11.0243	3.64982	0.967422	3.77273	0.000161472	0.00571567
Gh_A04G0881	72.1331	1.47573	0.285658	5.16607	2.39061e-07	3.6349e-06	54.1128	1.75217	0.366275	4.78374	1.72062e-06	0.000135244
Gh_A04G0921	31.1434	5.93885	0.929523	6.38914	1.6682e-10	4.14944e-09	11.1609	3.68838	0.941061	3.91938	8.87774e-05	0.00354572
Gh_A04G1257	23.3811	2.27755	0.485534	4.69082	2.72115e-06	3.38238e-05	24.169	3.03656	0.555439	5.46696	4.5783e-08	6.15725e-06
Gh_A04G1297	9.60778	2.24136	0.748546	2.99428	0.00275093	0.0144042	9.99237	2.52371	0.786736	3.20782	0.00133746	0.0290666
Gh_A04G1342	57.3601	2.18391	0.307184	7.10945	1.16507e-12	3.77514e-11	41.7611	1.90319	0.44232	4.30274	1.68695e-05	0.000928123
Gh_A04G1363	27.6205	2.07182	0.493337	4.19959	2.67393e-05	0.000261023	28.4826	1.64177	0.51895	3.16364	0.0015581	0.0326564
Gh_A04G1399	18.5368	2.6912	0.623233	4.31813	1.57356e-05	0.000162807	9.00944	6.63699	1.40501	4.72382	2.31459e-06	0.000171816
Gh_A05G0019	14.1823	2.09883	0.607798	3.45317	0.000554033	0.00371692	15.3671	2.64391	0.678763	3.89518	9.81251e-05	0.0038416
Gh_A05G0052	40.7655	2.35503	0.383599	6.13931	8.28814e-10	1.88263e-08	28.4732	2.72713	0.544742	5.00627	5.54935e-07	5.18096e-05
Gh_A05G0070	210.354	1.24031	0.176578	7.02416	2.15362e-12	6.74388e-11	359.537	1.60108	0.197556	8.10446	5.29782e-16	4.04995e-13
Gh_A05G0337	5.76413	4.96655	1.42038	3.49665	0.000471146	0.00323903	12.9656	3.86583	0.922467	4.19076	2.78026e-05	0.00139249
Gh_A05G0483	90.5079	3.08964	0.281085	10.9919	4.1825e-28	4.91229e-26	69.4251	2.53492	0.458117	5.53335	3.1417e-08	4.41602e-06
Gh_A05G0484	8.6	3.22257	0.888602	3.62656	0.000287223	0.00210286	7.96	4.54464	1.26024	3.60617	0.000310752	0.00948229
Gh_A05G0499	43.5724	5.41666	0.675718	8.01614	1.09117e-15	4.89255e-14	23.7007	5.56539	0.95953	5.80012	6.62665e-09	1.11486e-06
Gh_A05G0519	35.6778	3.36415	0.497487	6.76229	1.35827e-11	3.86639e-10	36.3367	1.27261	0.396132	3.21259	0.00131543	0.0286735
Gh_A05G0631	29.0851	5.40511	1.3363	4.04483	5.23605e-05	0.000474778	27.1811	2.43144	0.62345	3.89997	9.62064e-05	0.0037869
Gh_A05G0677	17.4961	3.59342	0.688297	5.22074	1.78211e-07	2.76895e-06	28.0117	2.62238	0.501346	5.23069	1.68876e-07	1.90766e-05
Gh_A05G0716	153.977	1.69514	0.201293	8.4213	3.72323e-17	1.92832e-15	166.154	2.14478	0.315765	6.79235	1.10325e-11	3.4585e-09
Gh_A05G0756	32.8207	1.40055	0.423274	3.30885	0.000936785	0.00579475	45.022	1.28171	0.373655	3.4302	0.000603145	0.0160253
Gh_A05G0770	151.974	3.77342	0.255381	14.7757	2.10234e-49	6.57872e-47	96.6833	2.83171	0.347066	8.15899	3.37844e-16	2.67659e-13
Gh_A05G0771	285.003	3.3125	0.19408	17.0678	2.57915e-65	1.49885e-62	148.525	1.59966	0.33978	4.70794	2.5023e-06	0.000184493
Gh_A05G0795	42.3634	3.5555	0.463556	7.67005	1.71927e-14	6.77233e-13	35.4211	3.14698	0.519959	6.05235	1.42747e-09	2.74012e-07
Gh_A05G0810	47.3581	1.87595	0.342931	5.47035	4.49154e-08	7.79625e-07	45.9518	1.73034	0.445937	3.88023	0.000104357	0.00404282
Gh_A05G0818	9.36087	4.1401	1.02012	4.05845	4.93999e-05	0.000450122	9.15912	4.77025	1.25834	3.79092	0.000150093	0.00539616
Gh_A05G0870	40.9243	1.1008	0.334864	3.28732	0.00101147	0.00619509	18.1886	1.72875	0.572873	3.01768	0.0025472	0.0466155
Gh_A05G0919	321.512	1.67792	0.19188	8.74463	2.23753e-18	1.30033e-16	422.206	3.3151	0.641333	5.16909	2.35242e-07	2.52474e-05
Gh_A05G0931	65.5977	1.73472	0.318379	5.44859	5.07717e-08	8.72812e-07	46.7973	2.75702	0.426276	6.4677	9.9506e-11	2.56561e-08
Gh_A05G0956	262.546	1.225	0.17198	7.12291	1.05673e-12	3.45914e-11	455.338	1.17626	0.279032	4.21552	2.49201e-05	0.00128209
Gh_A05G1030	365.843	1.97564	0.156507	12.6233	1.57035e-36	2.89177e-34	301.652	1.76209	0.253201	6.95925	3.42079e-12	1.2169e-09
Gh_A05G1256	7.59227	4.44943	1.23343	3.60738	0.00030931	0.00224255	10.6003	2.81629	0.8806	3.19815	0.00138312	0.0298949
Gh_A05G1259	28.1389	2.1509	0.440888	4.87856	1.06863e-06	1.44994e-05	25.1272	1.76179	0.539636	3.26477	0.00109552	0.0250979
Gh_A05G1378	23.9305	3.10514	0.546196	5.68503	1.30791e-08	2.48098e-07	36.1687	1.45877	0.473543	3.08054	0.00206627	0.0402198
Gh_A05G1382	6.52853	5.15254	1.37777	3.73976	0.000184194	0.00143096	6.38601	5.1419	1.42408	3.6107	0.000305375	0.00938764
Gh_A05G1472	101.899	1.0009	0.240907	4.1547	3.25718e-05	0.00031157	82.3324	1.73764	0.359512	4.83333	1.34268e-06	0.000110598
Gh_A05G1538	55.6497	1.86803	0.37374	4.99821	5.78646e-07	8.19926e-06	66.5824	1.85376	0.38797	4.77809	1.76966e-06	0.000137945
Gh_A05G1612	33.9852	6.06292	0.895915	6.76729	1.31216e-11	3.74228e-10	16.8078	2.55138	0.669108	3.81312	0.000137225	0.0050169
Gh_A05G1628	20.2711	3.48452	0.675102	5.16147	2.45014e-07	3.72035e-06	19.59	2.43575	0.743661	3.27535	0.0010553	0.0244985
Gh_A05G1666	33.5479	2.00954	0.404282	4.97064	6.67306e-07	9.37245e-06	27.2545	1.90342	0.501673	3.79415	0.000148153	0.00534405
Gh_A05G1688	41.9292	4.75065	0.561802	8.4561	2.76462e-17	1.45372e-15	83.9021	1.45687	0.302602	4.81447	1.47593e-06	0.000119762
Gh_A05G1718	199.141	1.29368	0.168828	7.66274	1.82005e-14	7.13793e-13	267.168	1.35862	0.22582	6.0164	1.78341e-09	3.33521e-07
Gh_A05G1720	47.4753	1.53957	0.322303	4.77679	1.78115e-06	2.30223e-05	36.416	1.58713	0.430096	3.69018	0.000224094	0.00735188
Gh_A05G1772	18.8806	2.61266	0.611011	4.27596	1.90315e-05	0.000193462	19.1201	2.64015	0.630746	4.18576	2.84212e-05	0.00141391
Gh_A05G1801	14.5669	2.38555	0.617184	3.86521	0.000110992	0.000917546	14.552	1.95154	0.636107	3.06794	0.00215541	0.0412653
Gh_A05G1810	63.8424	1.06095	0.283336	3.74448	0.000180765	0.00140847	119.65	1.01609	0.262413	3.87211	0.000107896	0.00415689
Gh_A05G1874	35.2465	4.66959	0.671517	6.9538	3.55586e-12	1.08465e-10	28.557	1.99366	0.576137	3.4604	0.000539373	0.0146888
Gh_A05G1936	147.395	3.67872	0.286946	12.8202	1.26304e-37	2.53447e-35	136.78	2.67392	0.277172	9.64716	5.05336e-22	7.86411e-19
Gh_A05G1970	35.4505	5.70187	0.791007	7.20837	5.6626e-13	1.91238e-11	7.11029	5.29754	1.39854	3.78791	0.000151919	0.00544832
Gh_A05G2088	168.485	2.13149	0.202645	10.5184	7.11021e-26	7.53952e-24	120.806	1.63666	0.313512	5.22042	1.7852e-07	1.9997e-05
Gh_A05G2152	112.623	2.57699	0.261291	9.86256	6.04857e-23	5.11648e-21	72.929	2.1757	0.373028	5.83253	5.45932e-09	9.3288e-07
Gh_A05G2205	4.55886	4.61025	1.45146	3.17629	0.00149174	0.00862323	15.0953	2.45417	0.71942	3.41132	0.00064649	0.0168785
Gh_A05G2379	28.1499	2.81973	0.494177	5.7059	1.15729e-08	2.21784e-07	34.2162	1.76829	0.485682	3.64084	0.000271748	0.00861175
Gh_A05G2425	25.3665	4.0019	0.678848	5.89513	3.7438e-09	7.7631e-08	27.0375	2.05696	0.544412	3.77831	0.000157898	0.00561654
Gh_A05G2432	31.5929	1.94642	0.399539	4.87165	1.10672e-06	1.49618e-05	34.0639	1.38435	0.449451	3.08008	0.00206942	0.0402198
Gh_A05G2622	8.27508	2.6044	0.890033	2.92619	0.00343143	0.0172891	12.7068	6.1531	1.32206	4.65416	3.25304e-06	0.000233523
Gh_A05G2724	18.2403	3.15402	0.657647	4.79591	1.61936e-06	2.11324e-05	17.9416	3.17218	0.71731	4.42232	9.76449e-06	0.000583646
Gh_A05G2727	27.4277	1.5505	0.444802	3.48582	0.000490623	0.00335284	23.1984	2.61075	0.568605	4.59149	4.40088e-06	0.0003001
Gh_A05G3108	256.882	4.33036	0.240274	18.0226	1.2955e-72	9.99498e-70	154.355	3.8662	0.719041	5.37688	7.57873e-08	9.51688e-06
Gh_A05G3109	17.6459	4.33071	0.786649	5.50526	3.68627e-08	6.48146e-07	15.4234	2.94226	0.720805	4.0819	4.46687e-05	0.00204369
Gh_A05G3361	27.0726	2.26242	0.451233	5.01387	5.33467e-07	7.60484e-06	30.5538	2.43522	0.493075	4.93884	7.85886e-07	6.97438e-05
Gh_A05G3364	66.5618	1.25095	0.316207	3.95609	7.61862e-05	0.000657889	49.9744	1.16114	0.368307	3.15264	0.00161799	0.0336205
Gh_A05G3375	18.7052	1.32556	0.502121	2.63993	0.00829239	0.0355599	18.8749	1.71541	0.565895	3.03133	0.00243482	0.0451083
Gh_A05G3389	62.4918	2.76267	0.33899	8.14971	3.64804e-16	1.71293e-14	57.2489	1.63951	0.412921	3.97052	7.17171e-05	0.0030077
Gh_A05G3406	28.4694	1.51575	0.423764	3.57688	0.000347726	0.00248682	20.4642	1.9318	0.535754	3.60576	0.000311237	0.0094838
Gh_A05G3681	113.68	2.40751	0.2508	9.59931	8.04832e-22	6.19873e-20	71.1912	2.64381	0.370841	7.12924	1.00925e-12	3.99793e-10
Gh_A05G3796	275.026	1.69706	0.165629	10.2461	1.2316e-24	1.18265e-22	241.036	1.91232	0.275676	6.93686	4.00897e-12	1.40876e-09
Gh_A05G3818	76.2394	3.12139	0.351816	8.87223	7.16981e-19	4.35325e-17	37.9948	1.97474	0.465376	4.24331	2.20244e-05	0.00115666
Gh_A05G3861	12.7747	3.31352	0.744497	4.45068	8.55989e-06	9.50938e-05	23.6093	1.97874	0.501396	3.94645	7.93185e-05	0.00325752
Gh_A05G3894	131.108	2.1097	0.215516	9.78908	1.25434e-22	1.02425e-20	83.4904	2.12553	0.314016	6.76886	1.29804e-11	4.04005e-09
Gh_A05G3895	67.7105	2.34646	0.35241	6.65832	2.7698e-11	7.54371e-10	44.3676	2.19822	0.413924	5.31067	1.09222e-07	1.29327e-05
Gh_A05G3962	5.80169	2.9619	1.07459	2.7563	0.0058459	0.0268217	10.4083	3.51916	0.937714	3.75292	0.000174787	0.00609292
Gh_A05G3963	90.4503	2.1263	0.251442	8.45644	2.75655e-17	1.45118e-15	144.027	3.07909	0.279383	11.021	3.02547e-28	1.01409e-24
Gh_A05G4010	14.4925	1.94335	0.587938	3.30537	0.000948522	0.00585602	20.639	1.82019	0.547045	3.32732	0.000876872	0.0212981
Gh_A06G0423	15.1635	4.44469	0.874333	5.08352	3.70513e-07	5.43063e-06	11.3334	2.58936	0.794601	3.25869	0.00111927	0.0255883
Gh_A06G0497	49.2975	2.75617	0.358661	7.6846	1.53475e-14	6.11548e-13	50.3057	1.84928	0.370509	4.99118	6.00114e-07	5.55344e-05
Gh_A06G0551	8.79849	5.59011	1.32998	4.20315	2.63221e-05	0.000257681	8.36054	4.01169	1.16262	3.45056	0.000559429	0.0150659
Gh_A06G0656	160.641	2.56424	0.25439	10.0799	6.77687e-24	6.12629e-22	115.431	1.87993	0.39379	4.77394	1.80658e-06	0.000140321
Gh_A06G0716	32.5564	2.58537	0.486766	5.31131	1.08838e-07	1.76014e-06	52.6882	3.61084	0.478573	7.54501	4.52237e-14	2.31833e-11
Gh_A06G0850	244.428	2.64243	0.197791	13.3597	1.03978e-40	2.43602e-38	151.133	2.71863	0.355578	7.64565	2.07886e-14	1.14395e-11
Gh_A06G0941	41.4682	1.21175	0.357707	3.38755	0.0007052	0.0045444	41.5283	1.42878	0.389754	3.66585	0.000246517	0.00795683
Gh_A06G1017	81.5724	1.35505	0.340623	3.97814	6.94572e-05	0.000607317	117.222	1.43769	0.317175	4.53278	5.82113e-06	0.000376894
Gh_A06G1090	296.78	1.13154	0.150653	7.5109	5.87216e-14	2.18973e-12	169.595	1.36953	0.299338	4.57521	4.7575e-06	0.000320407
Gh_A06G1231	233.155	1.41206	0.173308	8.14767	3.71013e-16	1.74026e-14	166.004	1.5528	0.261926	5.9284	3.05895e-09	5.44044e-07
Gh_A06G1433	444.222	1.80225	0.1515	11.896	1.24094e-32	1.90823e-30	309.263	1.80362	0.251582	7.16909	7.54967e-13	3.07448e-10
Gh_A06G1440	180.768	2.29654	0.191801	11.9735	4.8896e-33	7.75886e-31	175.354	1.49073	0.303722	4.90822	9.19068e-07	7.94593e-05
Gh_A06G1445	69.6866	1.33772	0.292629	4.57137	4.84539e-06	5.6875e-05	70.4236	2.02026	0.326617	6.1854	6.1944e-10	1.31027e-07
Gh_A06G2030	128.061	1.20772	0.210863	5.72752	1.01909e-08	1.97584e-07	125.637	1.45971	0.263779	5.53384	3.13294e-08	4.41602e-06
Gh_A07G0167	123.352	4.46213	0.324074	13.7689	3.92223e-43	1.00869e-40	40	2.40933	0.442653	5.44293	5.24118e-08	6.85824e-06
Gh_A07G0251	19.0395	5.2102	0.931032	5.59615	2.19162e-08	4.00125e-07	28.2269	2.55355	0.554101	4.60845	4.0569e-06	0.000281489
Gh_A07G0320	36.1119	1.42687	0.387874	3.67869	0.000234438	0.00176393	33.493	2.91596	0.47838	6.09548	1.0911e-09	2.19094e-07
Gh_A07G0484	84.0096	2.45492	0.289147	8.49022	2.06246e-17	1.09479e-15	70.9657	1.66199	0.347299	4.78548	1.70578e-06	0.000134652
Gh_A07G0547	111.991	2.83005	0.275531	10.2713	9.49534e-25	9.23691e-23	131.565	1.06136	0.295045	3.59729	0.000321551	0.00972932
Gh_A07G0565	10.9224	2.49475	0.812834	3.0692	0.00214634	0.0116914	11.2689	2.93865	0.827347	3.5519	0.000382463	0.0111177
Gh_A07G0606	9.29343	2.02098	0.80233	2.51889	0.0117724	0.047174	16.0416	2.15184	0.709599	3.03248	0.00242556	0.0449751
Gh_A07G0622	2684.03	3.60608	0.162235	22.2275	1.8612e-109	5.5523e-106	1583.31	1.60326	0.250889	6.3903	1.65562e-10	4.03029e-08
Gh_A07G0697	48.5896	1.68166	0.329774	5.09943	3.40679e-07	5.02131e-06	37.5408	2.45907	0.431571	5.69795	1.21254e-08	1.89374e-06
Gh_A07G0891	72.986	7.17918	0.872903	8.22449	1.96025e-16	9.52412e-15	69.8343	4.58551	0.503802	9.10181	8.88415e-20	1.10605e-16
Gh_A07G0909	32.3079	4.73714	0.658778	7.1908	6.44117e-13	2.1704e-11	30.3451	1.8224	0.568482	3.20573	0.00134719	0.0292489
Gh_A07G0925	343.648	4.26166	0.198756	21.4417	5.4618e-102	1.35781e-98	163.767	2.24956	0.302267	7.4423	9.89479e-14	4.8995e-11
Gh_A07G0926	208.468	3.63769	0.225112	16.1595	9.74206e-59	4.40341e-56	96.3062	1.65505	0.398658	4.15156	3.30219e-05	0.0016095
Gh_A07G1150	33.4463	3.347	0.523589	6.39242	1.63279e-10	4.06817e-09	35.4417	2.03083	0.51964	3.90814	9.30105e-05	0.00368105
Gh_A07G1218	59.8718	2.40448	0.315065	7.63169	2.31699e-14	9.03928e-13	43.5056	1.7233	0.407264	4.2314	2.32237e-05	0.00121046
Gh_A07G1245	87.9445	2.14567	0.27023	7.94016	2.01923e-15	8.75549e-14	85.2155	2.62054	0.381282	6.87297	6.2879e-12	2.07567e-09
Gh_A07G1257	18.6675	2.93289	0.662883	4.42445	9.66877e-06	0.000105784	14.1297	3.99262	1.11767	3.57227	0.000353897	0.0104446
Gh_A07G1261	20.3064	1.88849	0.522715	3.61286	0.000302843	0.00220244	17.2148	1.77612	0.59012	3.00977	0.00261449	0.0475475
Gh_A07G1275	39.2759	2.03683	0.37625	5.41352	6.17988e-08	1.04868e-06	38.893	2.16286	0.434912	4.97309	6.58927e-07	6.00671e-05
Gh_A07G1543	73.7057	2.31159	0.309206	7.4759	7.66759e-14	2.8286e-12	82.343	1.53165	0.318824	4.80406	1.55478e-06	0.000124996
Gh_A07G1765	22.1986	6.94573	1.27252	5.45823	4.80903e-08	8.31829e-07	18.2127	2.80501	0.720704	3.89204	9.94067e-05	0.00388132
Gh_A07G1798	290.887	1.21531	0.164659	7.38076	1.57384e-13	5.63861e-12	153.618	1.84254	0.355719	5.17976	2.2217e-07	2.42021e-05
Gh_A07G1802	39.8949	1.88398	0.362212	5.20133	1.97865e-07	3.04577e-06	42.9474	1.90144	0.490038	3.88018	0.000104378	0.00404282
Gh_A07G1811	33.624	4.41938	0.588734	7.50657	6.06948e-14	2.25954e-12	16.0025	2.73209	0.795214	3.43567	0.000591081	0.0157775
Gh_A07G2094	87.167	1.48539	0.267048	5.56225	2.66315e-08	4.79367e-07	91.7529	1.66559	0.303256	5.49236	3.96588e-08	5.43426e-06
Gh_A07G2106	59.6168	4.51199	0.449002	10.0489	9.28729e-24	8.26218e-22	57.8858	3.42558	0.487938	7.02053	2.21032e-12	8.0935e-10
Gh_A07G2148	2.45538	4.73214	1.65622	2.8572	0.00427398	0.0207477	3.88884	5.41054	1.57658	3.43183	0.000599526	0.0159388
Gh_A07G2154	9.53759	3.09805	0.835727	3.70701	0.000209723	0.00160121	9.38373	2.63634	0.873786	3.01715	0.00255161	0.0466571
Gh_A07G2197	110.478	1.51864	0.248953	6.10009	1.06009e-09	2.35653e-08	116.506	1.19305	0.27519	4.33537	1.45515e-05	0.000810827
Gh_A07G2249	17.5745	2.4787	0.684959	3.61875	0.000296031	0.00215921	14.9557	3.61372	0.869692	4.15517	3.25053e-05	0.00158966
Gh_A07G2348	198.751	4.57522	0.305193	14.9912	8.37846e-51	2.77718e-48	70.3729	2.01363	0.362018	5.56225	2.66313e-08	3.82981e-06
Gh_A08G0020	127.706	4.38071	0.343305	12.7604	2.7272e-37	5.2602e-35	90.6963	2.60959	0.430977	6.05505	1.40372e-09	2.71848e-07
Gh_A08G0123	25.958	4.91827	0.773799	6.356	2.07074e-10	5.06901e-09	34.94	1.80235	0.557331	3.2339	0.00122114	0.0271341
Gh_A08G0453	35.5169	3.19633	0.494382	6.46531	1.01089e-10	2.60028e-09	34.3963	1.61571	0.432845	3.73276	0.000189391	0.00648273
Gh_A08G0590	47.6275	2.23185	0.343535	6.49671	8.20982e-11	2.13465e-09	51.4272	1.40737	0.373281	3.77026	0.000163079	0.00574978
Gh_A08G0649	83.9674	4.37879	0.752102	5.82207	5.81216e-09	1.17313e-07	77.2553	1.47682	0.444179	3.32483	0.00088474	0.0214533
Gh_A08G0659	10.1685	3.48595	0.916159	3.80496	0.000141825	0.00113795	6.29327	5.12327	1.45684	3.5167	0.000436947	0.012359
Gh_A08G0840	33.8347	1.84627	0.383249	4.81741	1.4543e-06	1.9146e-05	30.3595	1.98651	0.463258	4.28813	1.80182e-05	0.00097774
Gh_A08G0919	103.653	6.68008	0.628581	10.6272	2.22592e-26	2.40593e-24	38.7573	3.97841	0.551342	7.21586	5.35927e-13	2.24543e-10
Gh_A08G0948	521.867	1.38425	0.158505	8.73314	2.47688e-18	1.43569e-16	458.922	1.53244	0.214491	7.14455	9.02901e-13	3.60945e-10
Gh_A08G1011	7.65245	3.38043	1.01365	3.33491	0.000853259	0.00534429	13.0656	2.23858	0.741809	3.01773	0.00254677	0.0466155
Gh_A08G1129	158.396	2.52865	0.490566	5.15456	2.54229e-07	3.84592e-06	140.81	1.20091	0.364428	3.29532	0.000983105	0.0233031
Gh_A08G1310	43.3928	2.06983	0.360225	5.74593	9.1416e-09	1.78651e-07	52.1338	1.7986	0.378901	4.74687	2.06587e-06	0.000155741
Gh_A08G1442	336.956	1.1262	0.151001	7.45826	8.76705e-14	3.21882e-12	135.241	1.39673	0.288806	4.83621	1.32337e-06	0.000109213
Gh_A08G1616	45.006	2.36058	0.366824	6.43519	1.23323e-10	3.13905e-09	37.7574	1.62968	0.43122	3.77922	0.00015732	0.00560511
Gh_A08G1623	106.979	3.69166	0.287997	12.8184	1.29352e-37	2.58404e-35	91.4663	2.09926	0.38972	5.38657	7.18149e-08	9.0741e-06
Gh_A08G1743	15.3466	4.88242	0.96264	5.07191	3.93853e-07	5.74263e-06	13.5814	4.72846	1.01012	4.6811	2.85343e-06	0.000206881
Gh_A08G1778	165.861	1.85485	0.219822	8.43796	3.22911e-17	1.68697e-15	211.878	3.55723	0.36488	9.74904	1.86213e-22	3.24562e-19
Gh_A08G1780	60.4516	2.54113	0.322416	7.88154	3.2337e-15	1.38074e-13	63.4516	2.08272	0.423935	4.91282	8.97757e-07	7.7926e-05
Gh_A08G1792	80.6004	3.35417	0.344874	9.72578	2.34102e-22	1.86398e-20	72.7663	3.26551	0.458774	7.1179	1.09585e-12	4.30186e-10
Gh_A08G1811	71.176	4.50456	0.443786	10.1503	3.30359e-24	3.05432e-22	45.3842	3.12172	0.576244	5.41735	6.04882e-08	7.79797e-06
Gh_A08G1834	458.212	1.0664	0.129349	8.24437	1.66039e-16	8.14685e-15	414.537	1.35454	0.227937	5.94262	2.80495e-09	5.09263e-07
Gh_A08G1966	47.7928	8.055	1.25797	6.40315	1.52202e-10	3.82196e-09	23.1917	7.02515	1.72111	4.08174	4.46989e-05	0.00204369
Gh_A08G2141	18.4682	2.77722	0.65095	4.26641	1.98642e-05	0.000201059	13.4574	3.22453	0.765935	4.20993	2.55451e-05	0.00130646
Gh_A08G2180	75.3472	1.21376	0.250847	4.83866	1.30715e-06	1.73775e-05	97.6874	1.68404	0.306462	5.4951	3.90481e-08	5.36744e-06
Gh_A08G2186	45.4821	2.05566	0.349302	5.88504	3.97954e-09	8.22905e-08	54.8722	1.36649	0.346038	3.94895	7.84953e-05	0.00323456
Gh_A08G2191	202.125	1.99329	0.182274	10.9357	7.78457e-28	9.0479e-26	160.892	1.24023	0.370749	3.3452	0.000822219	0.0202758
Gh_A08G2415	25.1051	3.27883	0.54341	6.0338	1.60148e-09	3.49049e-08	11.2276	3.38982	0.881154	3.84702	0.000119564	0.00449126
Gh_A08G2485	22.2345	3.32829	0.583381	5.70518	1.1622e-08	2.22622e-07	14.6319	3.3181	0.745936	4.44824	8.65778e-06	0.000527458
Gh_A08G2543	72.1669	4.29785	0.461215	9.31852	1.17974e-20	8.35299e-19	68.5375	1.32665	0.421134	3.15017	0.00163176	0.033842
Gh_A09G0128	13.4661	4.69062	0.979355	4.78949	1.67202e-06	2.17561e-05	14.415	4.39702	0.922264	4.76764	1.86398e-06	0.0001435
Gh_A09G0414	21.2688	1.35175	0.513588	2.63198	0.008489	0.0362156	28.1989	2.48619	0.495537	5.01716	5.24406e-07	4.96371e-05
Gh_A09G0430	20.3454	4.88668	0.868719	5.62515	1.85346e-08	3.42438e-07	16.9171	4.65037	0.972622	4.78128	1.74185e-06	0.000136264
Gh_A09G0623	7.39803	5.33828	1.46411	3.64608	0.000266266	0.0019743	5.8557	6.01529	1.48253	4.05744	4.96139e-05	0.00222874
Gh_A09G0834	36.8577	2.26404	0.391976	5.77596	7.65157e-09	1.51837e-07	27.6407	1.7899	0.514632	3.47802	0.000505134	0.0139456
Gh_A09G0903	133.365	2.00895	0.213493	9.40991	4.96576e-21	3.62493e-19	126.903	1.37818	0.274741	5.01628	5.26822e-07	4.96371e-05
Gh_A09G0913	245.787	4.86219	0.257156	18.9075	9.88592e-80	1.02878e-76	226.164	2.78799	0.266495	10.4617	1.29524e-25	3.13549e-22
Gh_A09G0968	172.281	1.99823	0.245587	8.13656	4.06675e-16	1.90354e-14	131.106	1.81663	0.318662	5.70079	1.19255e-08	1.86922e-06
Gh_A09G1004	61.6593	1.74523	0.311406	5.60435	2.09035e-08	3.83042e-07	96.5839	1.49431	0.273528	5.4631	4.67879e-08	6.25379e-06
Gh_A09G1018	41.6201	5.94213	0.815562	7.28594	3.19439e-13	1.1021e-11	28.1838	2.94181	0.668661	4.39955	1.08476e-05	0.00063617
Gh_A09G1201	16.3808	3.31374	0.670774	4.94018	7.80506e-07	1.08231e-05	12.0396	2.51607	0.736036	3.4184	0.000629894	0.0165482
Gh_A09G1448	57.5644	2.05611	0.307356	6.68967	2.23671e-11	6.18975e-10	54.2591	1.2622	0.370685	3.40504	0.000661546	0.017138
Gh_A09G1484	34.5903	1.54107	0.376662	4.09138	4.28808e-05	0.000397831	35.1125	1.64895	0.476628	3.45961	0.000540964	0.0147049
Gh_A09G1677	156.635	1.0212	0.1899	5.37756	7.55026e-08	1.26208e-06	148.543	1.18407	0.244393	4.84494	1.26651e-06	0.000105118
Gh_A09G1680	20.5825	1.63988	0.488374	3.35784	0.000785536	0.00497672	36.6345	1.84655	0.446488	4.13573	3.53824e-05	0.00170926
Gh_A09G1796	298.345	2.37682	0.203566	11.6759	1.69287e-31	2.4595e-29	197.125	1.07798	0.304351	3.54189	0.000397278	0.0114325
Gh_A09G1859	1037.47	2.44296	0.161705	15.1075	1.44572e-51	4.93841e-49	633	1.00803	0.254598	3.95932	7.51626e-05	0.00312139
Gh_A09G1916	30.5519	7.40785	1.25498	5.90275	3.57501e-09	7.44761e-08	11.594	3.45022	1.03092	3.34673	0.000817707	0.0201988
Gh_A09G1923	162.745	2.67526	0.23396	11.4347	2.80479e-30	3.74653e-28	137.558	2.54442	0.303573	8.38158	5.22233e-17	5.04743e-14
Gh_A09G1930	23.9497	4.79558	0.756263	6.34115	2.28053e-10	5.54918e-09	14.5723	2.56642	0.69366	3.69983	0.000215745	0.00717265
Gh_A09G1931	15.5489	3.4152	0.683182	4.99896	5.76417e-07	8.17026e-06	15.0006	2.59527	0.659083	3.93769	8.2269e-05	0.00335969
Gh_A09G1973	5.76175	4.02249	1.30587	3.08031	0.00206786	0.0113329	5.00705	5.79246	1.51138	3.83256	0.000126818	0.00468741
Gh_A09G2119	72.0001	1.69266	0.291349	5.80975	6.25667e-09	1.25887e-07	61.5273	2.0694	0.448153	4.61761	3.88183e-06	0.000271504
Gh_A09G2326	91.0905	3.91656	0.373051	10.4987	8.75696e-26	9.15552e-24	54.5924	1.35027	0.447454	3.01768	0.00254718	0.0466155
Gh_A09G2374	82.2578	1.59305	0.272569	5.84458	5.07843e-09	1.03436e-07	53.1461	1.77276	0.394332	4.49561	6.93706e-06	0.00043591
Gh_A09G2429	165.091	2.50135	0.245913	10.1717	2.65249e-24	2.47794e-22	121.33	1.19635	0.284965	4.19824	2.68997e-05	0.00135506
Gh_A10G0003	530.851	1.95256	0.190044	10.2742	9.20803e-25	9.01621e-23	534.534	1.14879	0.277911	4.13364	3.57059e-05	0.00171917
Gh_A10G0044	16.0778	4.52881	0.874421	5.17921	2.22823e-07	3.40186e-06	13.1645	2.54789	0.813166	3.1333	0.00172852	0.0351983
Gh_A10G0200	126.864	2.13475	0.215729	9.89551	4.35374e-23	3.71088e-21	133.621	1.35877	0.276628	4.91188	9.02077e-07	7.81453e-05
Gh_A10G0368	12.9281	4.63974	1.02197	4.53998	5.62605e-06	6.49689e-05	22.3107	1.96051	0.575596	3.40604	0.000659116	0.0170987
Gh_A10G0458	44.9897	1.09817	0.373378	2.94118	0.0032697	0.0166026	36.5382	1.75615	0.428858	4.09496	4.2225e-05	0.00196362
Gh_A10G0467	67.4077	2.208	0.294282	7.50301	6.23664e-14	2.31792e-12	68.7945	1.17765	0.331752	3.54979	0.000385535	0.0111762
Gh_A10G0538	15.8819	3.65527	0.720453	5.07357	3.90419e-07	5.69999e-06	13.8933	2.60205	0.833111	3.1233	0.00178837	0.0360985
Gh_A10G0572	16.8496	6.54382	1.28285	5.10102	3.37826e-07	4.98255e-06	11.9795	3.04836	0.938183	3.24922	0.00115724	0.0260866
Gh_A10G0595	29.1143	3.76459	0.549508	6.85084	7.34189e-12	2.16569e-10	19.9179	3.32694	0.689252	4.82689	1.38681e-06	0.000113375
Gh_A10G0616	5.23978	5.83386	1.42419	4.09626	4.19885e-05	0.000390705	20.2302	2.19629	0.721055	3.04594	0.00231954	0.0434903
Gh_A10G0640	11.6465	6.98123	1.29324	5.39826	6.72902e-08	1.13413e-06	28.3834	1.8894	0.481849	3.92115	8.81265e-05	0.00352943
Gh_A10G0698	7.2303	2.62418	0.929557	2.82305	0.00475698	0.022667	34.7831	4.66619	0.724449	6.44102	1.18675e-10	2.98909e-08
Gh_A10G0823	29.9187	1.80366	0.442303	4.07788	4.54487e-05	0.000418164	32.7348	1.61742	0.451415	3.583	0.000339671	0.0101167
Gh_A10G0985	22.449	4.7011	0.795885	5.90675	3.48914e-09	7.28568e-08	12.0991	4.11382	0.997972	4.12218	3.75303e-05	0.00178142
Gh_A10G1163	53.7132	3.83693	0.775493	4.94774	7.50813e-07	1.04437e-05	41.4549	2.75999	0.598429	4.61205	3.98716e-06	0.000277534
Gh_A10G1320	902.622	1.20475	0.128476	9.37727	6.77061e-21	4.90245e-19	735.921	1.76347	0.194839	9.05093	1.41758e-19	1.71582e-16
Gh_A10G1359	13.9978	3.45776	0.731351	4.72791	2.26838e-06	2.85931e-05	11.4109	2.60135	0.834899	3.11577	0.00183467	0.0367896
Gh_A10G1598	34.1599	1.09146	0.392663	2.77964	0.00544188	0.0253027	11.5205	2.8056	0.87818	3.19479	0.00139934	0.0301409
Gh_A10G1737	34.7939	2.8129	0.470834	5.9743	2.31086e-09	4.94532e-08	37.2374	2.41505	0.455042	5.30731	1.11257e-07	1.3032e-05
Gh_A10G1836	11.2791	2.21311	0.677985	3.26425	0.00109755	0.006645	16.6454	2.13381	0.641645	3.32553	0.000882519	0.0214233
Gh_A10G1852	183.42	1.53327	0.197027	7.78201	7.138e-15	2.94388e-13	213.699	1.16866	0.236868	4.93379	8.0648e-07	7.11368e-05
Gh_A10G1856	171.363	1.3891	0.213438	6.50819	7.60625e-11	1.98463e-09	182.631	1.89468	0.289265	6.55001	5.75347e-11	1.56688e-08
Gh_A10G1970	50.3033	3.82166	0.754224	5.06701	4.04112e-07	5.88646e-06	82.3835	1.37494	0.433671	3.17046	0.00152197	0.0320891
Gh_A10G1980	36.1168	3.75181	0.504417	7.43792	1.02284e-13	3.71812e-12	23.2862	3.74483	0.731511	5.11931	3.06651e-07	3.15142e-05
Gh_A10G1982	14.4992	3.10768	0.677096	4.58972	4.43835e-06	5.25416e-05	13.3202	3.02689	0.809426	3.73955	0.000184348	0.00633999
Gh_A10G2070	37.3499	1.58143	0.358014	4.41725	9.99663e-06	0.000108919	41.0196	2.42833	0.425255	5.71028	1.12792e-08	1.78719e-06
Gh_A10G2124	32.6458	2.8387	0.478954	5.92686	3.08773e-09	6.51744e-08	26.6142	3.26925	0.575491	5.6808	1.3407e-08	2.07055e-06
Gh_A10G2194	26.6419	5.28824	0.836269	6.32361	2.55518e-10	6.18051e-09	18.2166	3.35933	0.737515	4.55493	5.24029e-06	0.000345447
Gh_A10G2299	12.3427	2.37328	0.738147	3.21518	0.00130363	0.00769692	23.8516	2.33495	0.536226	4.35441	1.33428e-05	0.000753889
Gh_A11G0080	25.7855	5.23545	0.80978	6.46528	1.01111e-10	2.60028e-09	17.9922	4.38667	0.807965	5.42928	5.65804e-08	7.3376e-06
Gh_A11G0093	55.3217	5.33845	0.620389	8.605	7.6318e-18	4.19028e-16	54.4036	4.85805	0.606351	8.01194	1.12918e-15	7.93592e-13
Gh_A11G0094	23.4592	6.11624	1.13424	5.39235	6.95428e-08	1.16901e-06	17.1136	5.66417	1.18165	4.79345	1.6394e-06	0.000130595
Gh_A11G0098	26.7615	4.26302	0.678504	6.28297	3.32162e-10	7.92725e-09	18.3767	3.9072	0.795239	4.91325	8.95793e-07	7.79108e-05
Gh_A11G0239	10.5477	2.59815	0.80014	3.24712	0.0011658	0.00700422	17.7021	2.62544	0.758578	3.46101	0.00053816	0.0146653
Gh_A11G0254	37.8414	3.45759	0.489787	7.05938	1.6725e-12	5.30037e-11	30.0891	2.41452	0.619238	3.89917	9.6522e-05	0.00379247
Gh_A11G0261	58.3059	1.09837	0.299992	3.66132	0.000250922	0.00187107	55.1426	1.4203	0.410736	3.45794	0.000544327	0.0147595
Gh_A11G0423	62.2772	1.52771	0.282366	5.41037	6.28964e-08	1.06609e-06	70.9131	1.80919	0.330766	5.46971	4.50783e-08	6.10013e-06
Gh_A11G0514	14.4742	4.80639	0.964413	4.98374	6.23658e-07	8.78716e-06	15.987	3.12142	0.727681	4.28955	1.79039e-05	0.000973525
Gh_A11G0750	11.7288	6.00875	1.33971	4.4851	7.28806e-06	8.24383e-05	14.4483	3.31797	0.812926	4.08151	4.47441e-05	0.00204369
Gh_A11G0778	116.797	3.44197	0.27678	12.4358	1.67118e-35	2.86521e-33	106.875	1.54824	0.324803	4.76672	1.87251e-06	0.000143649
Gh_A11G0792	34.1915	1.66823	0.372801	4.47485	7.64662e-06	8.60158e-05	38.5187	1.617	0.434659	3.72017	0.000199092	0.00674589
Gh_A11G0815	53.9933	2.34844	0.361496	6.49646	8.22341e-11	2.13694e-09	76.7114	2.48493	0.325069	7.64434	2.10024e-14	1.14395e-11
Gh_A11G0835	142.475	2.45188	0.217536	11.2711	1.82189e-29	2.2965e-27	165.004	1.70116	0.253215	6.71827	1.83897e-11	5.48845e-09
Gh_A11G0886	39.2672	3.5903	0.459138	7.81965	5.29687e-15	2.21725e-13	33.3771	1.43185	0.451995	3.16784	0.00153578	0.0323117
Gh_A11G0931	122.76	5.49028	0.405087	13.5533	7.57157e-42	1.83142e-39	95.9219	2.25778	0.392197	5.75674	8.57528e-09	1.41076e-06
Gh_A11G0932	54.5391	6.0085	0.695655	8.63718	5.76172e-18	3.22282e-16	32.1398	1.77501	0.547227	3.24364	0.00118011	0.0264382
Gh_A11G1038	98.9115	2.10532	0.281154	7.48815	6.98505e-14	2.5832e-12	121.291	1.7631	0.329803	5.34591	8.99641e-08	1.09807e-05
Gh_A11G1220	11.3442	3.38707	0.881646	3.84176	0.000122155	0.000998572	7.9598	3.92086	1.13691	3.4487	0.00056329	0.0151324
Gh_A11G1574	18.3059	3.02356	0.604055	5.00544	5.57342e-07	7.92247e-06	15.7742	2.9574	0.732227	4.03891	5.37005e-05	0.00236836
Gh_A11G1600	9.96393	3.80324	1.01662	3.74107	0.000183238	0.00142452	9.39621	2.87899	0.912679	3.15443	0.00160811	0.0334866
Gh_A11G1615	271.616	1.3332	0.157812	8.44807	2.96157e-17	1.55181e-15	211.866	1.71508	0.224044	7.65509	1.93173e-14	1.07914e-11
Gh_A11G1755	69.5974	2.2445	0.32619	6.88096	5.94517e-12	1.77356e-10	82.0252	2.14161	0.419877	5.10055	3.38664e-07	3.43185e-05
Gh_A11G1777	18.3748	1.7083	0.538652	3.17144	0.00151686	0.00874585	18.3629	2.2963	0.59916	3.83254	0.000126829	0.00468741
Gh_A11G1779	27.6576	3.68438	0.591458	6.22933	4.68435e-10	1.09976e-08	37.3422	1.83426	0.444788	4.12391	3.72501e-05	0.00177198
Gh_A11G1897	54.0143	2.01789	0.315255	6.40082	1.54544e-10	3.87643e-09	91.2809	1.15703	0.35419	3.26671	0.00108807	0.0250325
Gh_A11G1913	12.5665	2.87578	0.708459	4.05921	4.92393e-05	0.000448749	11.7239	2.47968	0.76409	3.24527	0.0011734	0.0263788
Gh_A11G2034	6.3295	6.10077	1.38751	4.39691	1.098e-05	0.000118365	6.24914	6.10115	1.43515	4.25123	2.126e-05	0.00112974
Gh_A11G2088	1012.5	3.26145	0.142779	22.8426	1.7315e-115	6.4567e-112	760.664	2.45063	0.216486	11.32	1.04414e-29	4.13612e-26
Gh_A11G2287	86.0246	1.46694	0.257087	5.706	1.15664e-08	2.21753e-07	57.5507	2.34218	0.40876	5.72998	1.00445e-08	1.62706e-06
Gh_A11G2303	8.78804	2.27779	0.796524	2.85966	0.00424095	0.0206119	15.2487	2.08104	0.665179	3.12855	0.00175671	0.035653
Gh_A11G2747	75.7552	1.14221	0.262409	4.35279	1.34413e-05	0.000141423	83.4343	1.28233	0.396645	3.23295	0.00122521	0.0271953
Gh_A11G2865	13.7881	2.86185	0.66691	4.29121	1.77699e-05	0.000181835	10.7739	2.65926	0.825225	3.22246	0.00127095	0.0279284
Gh_A11G3017	77.1659	1.99349	0.273782	7.28131	3.30587e-13	1.13881e-11	113.309	1.3165	0.262809	5.00933	5.46192e-07	5.11823e-05
Gh_A11G3024	64.0297	4.95483	0.507335	9.76639	1.56948e-22	1.26771e-20	63.0253	4.53533	0.531162	8.5385	1.35978e-17	1.41074e-14
Gh_A11G3082	10.3964	6.81999	1.98687	3.43252	0.000597998	0.00395729	10.7526	5.91053	1.49289	3.95911	7.52287e-05	0.00312139
Gh_A11G3163	36.6508	1.09553	0.39169	2.79693	0.00515906	0.0242015	59.6912	1.27624	0.327473	3.89724	9.72969e-05	0.00381604
Gh_A11G3183	14.0418	2.09302	0.618086	3.38629	0.000708446	0.00456072	25.783	1.64632	0.517945	3.17856	0.00148011	0.0314146
Gh_A11G3297	4.07201	5.46329	1.48378	3.68201	0.000231405	0.00174472	5.71019	5.97923	1.46949	4.06891	4.72327e-05	0.00214835
Gh_A12G0003	8.0762	2.82136	0.867253	3.25322	0.00114105	0.00687254	10.0616	2.70929	0.840012	3.2253	0.00125842	0.0277128
Gh_A12G0062	40.7037	2.18346	0.365176	5.9792	2.24239e-09	4.81027e-08	26.8056	1.89479	0.531001	3.56833	0.000359262	0.0105631
Gh_A12G0114	19.207	2.9739	0.577835	5.14663	2.65205e-07	3.98905e-06	17.7905	2.1573	0.662573	3.25595	0.00113014	0.0257555
Gh_A12G0197	18.1619	3.02289	0.684324	4.41733	9.99263e-06	0.000108902	14.5096	2.83331	0.756349	3.74604	0.000179648	0.006219
Gh_A12G0322	71.353	3.19962	0.323613	9.88719	4.73107e-23	4.02483e-21	54.6828	2.89124	0.490045	5.89994	3.63641e-09	6.38924e-07
Gh_A12G0350	62.4307	1.23324	0.305662	4.03466	5.46807e-05	0.000493376	86.5568	1.03947	0.317116	3.27789	0.00104586	0.0243832
Gh_A12G0379	16.2482	3.92946	0.735707	5.34107	9.2402e-08	1.51625e-06	12.6805	2.73643	0.745942	3.66843	0.000244048	0.00790055
Gh_A12G0460	5.25685	3.2507	1.14551	2.83777	0.00454299	0.0218333	19.3707	2.23147	0.65918	3.38523	0.000711196	0.0180803
Gh_A12G0551	17.3816	5.67531	1.14564	4.95383	7.27664e-07	1.01501e-05	13.5274	2.43966	0.751946	3.24447	0.00117671	0.0264027
Gh_A12G0696	51.2783	1.3442	0.313143	4.29262	1.76576e-05	0.000180769	88.5236	1.00455	0.305808	3.28492	0.0010201	0.0239881
Gh_A12G0785	15.7422	5.5336	1.14827	4.81909	1.44218e-06	1.89975e-05	7.62276	3.8884	1.23352	3.15227	0.00162004	0.033647
Gh_A12G0985	12.6987	1.68566	0.642395	2.62402	0.00868978	0.0368928	14.9014	3.19462	0.789127	4.04829	5.15926e-05	0.00229867
Gh_A12G1007	103.529	1.94342	0.235679	8.24606	1.63697e-16	8.04072e-15	81.0607	1.72289	0.326779	5.27234	1.34692e-07	1.56508e-05
Gh_A12G1016	56.3025	2.42632	0.326402	7.43354	1.0573e-13	3.83713e-12	93.8763	1.66246	0.285747	5.81794	5.9578e-09	1.01014e-06
Gh_A12G1141	14.585	3.74989	0.781156	4.80043	1.58323e-06	2.06911e-05	15.9288	2.93641	0.691223	4.24813	2.15563e-05	0.0011413
Gh_A12G1151	15.8785	7.43482	1.28658	5.77876	7.52512e-09	1.49394e-07	36.4215	2.30407	0.488876	4.71299	2.44106e-06	0.000180589
Gh_A12G1164	26.1994	6.28008	1.08805	5.77188	7.83942e-09	1.55083e-07	19.2206	3.14402	0.753575	4.17214	3.01747e-05	0.00148401
Gh_A12G1169	22.4615	5.03345	1.23301	4.08226	4.46002e-05	0.000411838	12.0191	3.50641	0.918238	3.81863	0.000134195	0.00492205
Gh_A12G1239	41.9988	1.76516	0.364882	4.83762	1.31406e-06	1.74589e-05	32.0466	1.38874	0.434574	3.19564	0.0013952	0.0300883
Gh_A12G1262	163.995	2.84643	0.219745	12.9533	2.25021e-38	4.74964e-36	437.278	1.03099	0.2639	3.90674	9.35481e-05	0.00369818
Gh_A12G1314	36.0914	2.58257	0.46251	5.58382	2.35291e-08	4.27305e-07	32.0999	2.54175	0.560417	4.53547	5.74759e-06	0.000372687
Gh_A12G1325	84.0538	1.43214	0.248207	5.76994	7.93011e-09	1.5667e-07	59.4445	1.92889	0.363358	5.30851	1.10528e-07	1.29815e-05
Gh_A12G1414	70.7679	1.02681	0.266604	3.85143	0.000117429	0.000964523	58.3718	1.88097	0.360725	5.2144	1.84408e-07	2.05509e-05
Gh_A12G1423	95.7358	2.02725	0.312275	6.49188	8.47739e-11	2.20109e-09	132.678	2.10876	0.297059	7.09881	1.25836e-12	4.85235e-10
Gh_A12G1548	89.1503	1.69404	0.259103	6.5381	6.23038e-11	1.63902e-09	78.4293	1.42065	0.320436	4.43348	9.27221e-06	0.000560371
Gh_A12G1566	11.1002	6.91343	1.29932	5.32079	1.03318e-07	1.67935e-06	5.47233	5.92069	1.49345	3.96443	7.35712e-05	0.00307658
Gh_A12G1807	72.9191	1.2181	0.311353	3.91229	9.14246e-05	0.00077292	85.9894	1.46292	0.295258	4.95474	7.24277e-07	6.49375e-05
Gh_A12G1857	77.5285	1.38394	0.261516	5.292	1.20985e-07	1.93539e-06	67.7967	1.15195	0.340308	3.38504	0.000711683	0.0180821
Gh_A12G1874	40.3013	2.17079	0.385381	5.63283	1.77271e-08	3.28625e-07	33.2272	2.48444	0.481332	5.1616	2.44849e-07	2.61496e-05
Gh_A12G1878	207.521	1.49626	0.206184	7.25695	3.9593e-13	1.35659e-11	224.868	1.68487	0.257387	6.54603	5.90854e-11	1.59912e-08
Gh_A12G2057	20.3758	6.8148	1.25279	5.4397	5.33704e-08	9.13626e-07	10.5011	3.54671	0.906416	3.91289	9.11977e-05	0.00362772
Gh_A12G2060	15.9261	6.45963	1.27344	5.07259	3.92428e-07	5.72371e-06	10.9306	5.00742	1.3256	3.77749	0.00015842	0.00562591
Gh_A12G2065	23.2182	4.75399	0.769741	6.17609	6.57089e-10	1.51252e-08	14.021	2.61936	0.792335	3.30588	0.000946783	0.0226428
Gh_A12G2077	20.9309	3.53696	0.632454	5.59244	2.23898e-08	4.08106e-07	7.6942	3.84704	1.1427	3.36661	0.000760983	0.0191192
Gh_A12G2193	53.7388	1.0697	0.304273	3.51558	0.000438797	0.0030447	63.3398	1.24349	0.32852	3.78512	0.000153632	0.00548719
Gh_A12G2201	601.417	2.74002	0.178473	15.3525	3.40718e-53	1.27054e-50	603.877	2.41593	0.248636	9.7167	2.55933e-22	4.13039e-19
Gh_A12G2209	54.4079	1.20256	0.320771	3.74898	0.000177559	0.00138738	61.6037	1.07402	0.349007	3.07736	0.00208845	0.0404275
Gh_A12G2233	19.9175	3.038	0.584215	5.20014	1.99143e-07	3.06334e-06	14.6604	4.85472	1.05205	4.61455	3.93957e-06	0.00027466
Gh_A12G2296	29.3677	1.13303	0.402781	2.81302	0.0049079	0.0232573	31.3293	1.92317	0.47286	4.0671	4.76014e-05	0.00216061
Gh_A12G2315	9.97021	3.80514	0.952755	3.99383	6.50154e-05	0.000573489	13.6033	2.87254	0.720345	3.98773	6.67084e-05	0.00283862
Gh_A12G2357	11.7091	3.70008	0.83994	4.40517	1.057e-05	0.000114469	7.29392	2.98559	0.976155	3.05852	0.00222434	0.0421251
Gh_A12G2368	5.35466	2.81325	1.05631	2.66329	0.00773812	0.0335594	5.80676	4.98028	1.49848	3.32355	0.00088878	0.0215192
Gh_A12G2426	24.812	7.10504	1.27716	5.56317	2.64911e-08	4.77031e-07	16.2463	2.97863	0.728114	4.09088	4.29744e-05	0.00198786
Gh_A12G2472	15.5826	3.62612	0.707934	5.12212	3.02124e-07	4.48853e-06	11.5065	3.16231	0.825059	3.83283	0.000126677	0.00468741
Gh_A12G2506	450.619	1.00274	0.140386	7.1427	9.1512e-13	3.02436e-11	455.603	1.0159	0.21286	4.77263	1.81835e-06	0.000140733
Gh_A12G2584	64.1451	3.17633	0.739249	4.2967	1.73362e-05	0.000178102	46.49	1.9251	0.449657	4.28125	1.85843e-05	0.0010072
Gh_A12G2633	14.9983	2.44414	0.618932	3.94896	7.84913e-05	0.000675578	18.3573	2.49716	0.620086	4.02712	5.64644e-05	0.00247026
Gh_A12G2722	117.732	1.61664	0.251299	6.43316	1.24978e-10	3.17577e-09	116.301	2.40176	0.335344	7.16208	7.94603e-13	3.20593e-10
Gh_A13G0138	175.536	1.54043	0.185554	8.30181	1.0254e-16	5.12103e-15	151.476	2.19644	0.283826	7.7387	1.00441e-14	6.00069e-12
Gh_A13G0280	65.7614	1.22583	0.267919	4.57538	4.75363e-06	5.59326e-05	51.294	1.75291	0.378089	4.63623	3.54818e-06	0.000251396
Gh_A13G0283	21.6293	5.38705	1.37735	3.91115	9.18559e-05	0.00077598	12.9566	2.62309	0.782206	3.35345	0.000798111	0.0198046
Gh_A13G0407	7.05061	5.26992	1.38682	3.80001	0.000144688	0.00115885	3.65122	5.34067	1.69094	3.15841	0.00158634	0.0331685
Gh_A13G0408	85.0005	1.37349	0.263716	5.20822	1.90662e-07	2.94706e-06	63.1859	1.72375	0.33652	5.12227	3.01877e-07	3.11706e-05
Gh_A13G0479	486.061	1.79164	0.147023	12.1861	3.68472e-34	6.01766e-32	653.345	1.46219	0.201891	7.24247	4.40584e-13	1.9198e-10
Gh_A13G0541	35.9037	2.35689	0.430401	5.47604	4.34951e-08	7.57322e-07	31.1112	3.17302	0.51466	6.16527	7.03652e-10	1.46004e-07
Gh_A13G0766	27.1219	4.98491	0.783872	6.35934	2.02628e-10	4.97651e-09	26.5439	1.73535	0.532928	3.25626	0.00112892	0.0257412
Gh_A13G0935	24.2209	2.73296	0.511822	5.33966	9.31218e-08	1.5275e-06	14.865	3.04552	0.828277	3.67694	0.000236052	0.00767593
Gh_A13G1008	73.5907	6.44978	0.707102	9.12144	7.41342e-20	4.87001e-18	45.8396	3.35945	0.493456	6.80801	9.89601e-12	3.1247e-09
Gh_A13G1142	44.9598	1.86522	0.428305	4.35488	1.33139e-05	0.000140413	37.7709	1.92403	0.482788	3.98525	6.74083e-05	0.00286282
Gh_A13G1193	18.9783	3.3742	0.63329	5.32806	9.92695e-08	1.61944e-06	18.5113	2.6796	0.674376	3.97345	7.08403e-05	0.0029853
Gh_A13G1300	36.6427	3.99423	0.513132	7.78401	7.02608e-15	2.90307e-13	30.5885	2.47072	0.53997	4.57566	4.74714e-06	0.000320204
Gh_A13G1409	203.834	3.76194	0.245686	15.312	6.36227e-53	2.31463e-50	202.408	3.61236	0.314354	11.4914	1.45777e-30	6.3521e-27
Gh_A13G1435	21.2533	7.85111	1.61145	4.87207	1.10436e-06	1.49344e-05	15.5413	3.65552	0.835737	4.374	1.21988e-05	0.000697571
Gh_A13G1677	70.7464	2.66071	0.304108	8.74925	2.14776e-18	1.24978e-16	87.0139	1.31798	0.297407	4.43158	9.35468e-06	0.000564176
Gh_A13G1686	18.7976	2.04166	0.571862	3.57019	0.000356725	0.00254062	31.0492	2.34347	0.555028	4.22225	2.41871e-05	0.00125021
Gh_A13G1706	257.618	2.05763	0.179366	11.4716	1.83152e-30	2.46858e-28	348.732	1.1496	0.228963	5.02093	5.14226e-07	4.88167e-05
Gh_A13G1709	90.19	1.61438	0.268973	6.00199	1.94913e-09	4.21351e-08	68.3626	1.47993	0.372309	3.97501	7.03761e-05	0.00296861
Gh_A13G1810	28.2628	5.37256	0.814596	6.59536	4.24219e-11	1.1367e-09	24.5437	6.20942	1.11525	5.56774	2.58059e-08	3.74822e-06
Gh_A13G1818	15.2756	4.4609	0.873907	5.10455	3.31583e-07	4.89854e-06	7.30824	3.77392	1.1741	3.21429	0.00130766	0.0285757
Gh_A13G1866	33.4134	3.53035	0.950512	3.71416	0.000203879	0.00156291	33.5821	1.67995	0.552588	3.04014	0.00236467	0.0441719
Gh_A13G1945	90.9826	3.34513	0.340241	9.83166	8.22547e-23	6.85425e-21	73.9337	2.41179	0.353485	6.82291	8.92175e-12	2.8585e-09
Gh_A13G1964	29.6973	1.56184	0.474589	3.29094	0.000998535	0.00612941	20.9596	1.72496	0.555455	3.1055	0.00189959	0.0377958
Gh_A13G2033	89.3683	2.8894	0.31035	9.31013	1.27681e-20	9.02601e-19	65.1941	1.55014	0.449302	3.45012	0.000560341	0.0150811
Gh_A13G2133	164.737	2.2054	0.211367	10.434	1.73461e-25	1.77216e-23	145.568	2.85525	0.806564	3.54002	0.000400101	0.0114848
Gh_A13G2204	90.8771	1.58876	0.245344	6.47563	9.44195e-11	2.43802e-09	117.591	1.40242	0.263184	5.32867	9.89321e-08	1.19746e-05
Gh_D01G0018	43.0309	5.39318	0.677617	7.95904	1.73386e-15	7.59165e-14	39.1617	2.60012	0.577556	4.50194	6.73363e-06	0.000425926
Gh_D01G0090	7.98756	3.09052	0.961084	3.21566	0.00130145	0.00768506	8.0416	4.56451	1.26034	3.62166	0.000292723	0.00914345
Gh_D01G0243	12.4298	5.17667	1.15571	4.47922	7.49148e-06	8.45256e-05	9.22033	4.15327	1.09219	3.8027	0.000143128	0.00518856
Gh_D01G0585	1393.67	1.53315	0.1027	14.9284	2.15355e-50	7.08581e-48	1164.76	1.06843	0.21577	4.95169	7.3572e-07	6.58281e-05
Gh_D01G0689	58.4794	1.5158	0.300207	5.04917	4.43725e-07	6.41338e-06	77.5727	1.69768	0.357348	4.75078	2.02632e-06	0.000153289
Gh_D01G0906	263.129	3.15712	0.183703	17.1861	3.37683e-66	1.98824e-63	332.427	1.58424	0.224695	7.05064	1.78091e-12	6.68978e-10
Gh_D01G0911	32.7162	4.98493	0.686454	7.26186	3.818e-13	1.30918e-11	71.1821	4.61713	1.14176	4.04387	5.25762e-05	0.00232914
Gh_D01G0995	14.9466	3.80191	0.795724	4.77792	1.77119e-06	2.29265e-05	39.9005	1.67071	0.424176	3.93872	8.19186e-05	0.00335166
Gh_D01G1125	10.3383	4.29932	1.01843	4.22153	2.42652e-05	0.000239484	24.5364	1.60671	0.503444	3.19144	0.00141565	0.030402
Gh_D01G1133	68.4331	3.41966	0.366486	9.33094	1.04937e-20	7.50114e-19	72.2631	1.32668	0.412098	3.21932	0.00128494	0.0281407
Gh_D01G1309	14.1964	2.22228	0.638201	3.4821	0.000497501	0.0033931	19.5513	3.29544	0.652368	5.05151	4.38336e-07	4.2634e-05
Gh_D01G1401	35.0569	1.79492	0.381152	4.70918	2.48709e-06	3.11482e-05	26.0092	1.47051	0.468489	3.13883	0.00169623	0.034819
Gh_D01G1577	3.01442	3.99558	1.57075	2.54375	0.0109671	0.0445048	3.84281	5.41315	1.64234	3.29599	0.000980745	0.0232761
Gh_D01G1588	93.2193	1.93735	0.263109	7.3633	1.79413e-13	6.37172e-12	85.2314	1.1105	0.318696	3.48452	0.000493019	0.0136833
Gh_D01G1652	620.087	2.40431	0.130453	18.4304	7.49712e-76	6.98919e-73	352.404	1.9396	0.261134	7.42758	1.10601e-13	5.34675e-11
Gh_D01G1679	37.0147	2.62204	0.422981	6.19895	5.68406e-10	1.32061e-08	48.6822	2.57572	0.411472	6.25979	3.85505e-10	8.48383e-08
Gh_D01G1908	5.57561	5.92235	1.48429	3.99001	6.607e-05	0.000581759	14.398	2.53357	0.692697	3.65754	0.00025465	0.00818299
Gh_D01G1953	12.4502	4.59094	1.01327	4.53081	5.87576e-06	6.76256e-05	12.4595	3.55428	0.962476	3.69285	0.000221758	0.00729275
Gh_D01G1984	3.79117	5.3572	1.51457	3.53711	0.000404538	0.00283913	7.03546	4.34156	1.30991	3.31441	0.000918377	0.0220968
Gh_D01G2263	201.085	4.33218	0.598885	7.23373	4.6989e-13	1.60142e-11	239.602	3.07004	0.943919	3.25244	0.00114417	0.0259199
Gh_D01G2299	227.238	2.40868	0.192639	12.5036	7.13382e-36	1.25186e-33	182.339	1.47398	0.228338	6.45525	1.08039e-10	2.73703e-08
Gh_D02G0031	80.6802	1.9566	0.278628	7.02226	2.18308e-12	6.83137e-11	112.184	1.48902	0.301888	4.93235	8.12473e-07	7.13764e-05
Gh_D02G0086	12.5745	3.8273	0.854071	4.48124	7.42118e-06	8.37958e-05	13.0218	3.38757	0.903282	3.75029	0.000176631	0.00614248
Gh_D02G0107	128.738	4.05525	0.580392	6.98709	2.80645e-12	8.65493e-11	100.446	4.31337	1.40147	3.07775	0.00208569	0.0404098
Gh_D02G0122	26.648	2.50184	0.486259	5.14507	2.67421e-07	4.01831e-06	33.6052	2.72737	0.475869	5.73134	9.96405e-09	1.62005e-06
Gh_D02G0123	37.2466	3.89926	0.501722	7.77174	7.7416e-15	3.16945e-13	32.9705	3.36132	0.582135	5.77413	7.73532e-09	1.28159e-06
Gh_D02G0397	15.0483	1.71686	0.56522	3.03751	0.00238544	0.0127806	24.118	2.49844	0.551326	4.53169	5.85134e-06	0.000378288
Gh_D02G0485	9.752	5.74122	1.35728	4.22993	2.33762e-05	0.000231835	17.8624	4.70854	0.897802	5.24452	1.56687e-07	1.79198e-05
Gh_D02G0530	15.0705	2.45341	0.625329	3.92339	8.73116e-05	0.000741229	16.883	1.8856	0.622722	3.028	0.00246177	0.0454145
Gh_D02G0622	255.084	2.89935	0.201364	14.3985	5.28465e-47	1.53557e-44	153.488	1.34874	0.290793	4.63814	3.51552e-06	0.000249487
Gh_D02G0666	27.9419	1.62356	0.468996	3.46179	0.000536604	0.00361735	25.9754	2.17239	0.684997	3.17139	0.00151713	0.0320211
Gh_D02G0729	6.28924	2.6889	0.999004	2.69158	0.00711147	0.0314357	2.92251	5.00752	1.67336	2.9925	0.00276703	0.0496788
Gh_D02G0869	22.6556	3.50255	0.592676	5.90973	3.42672e-09	7.16538e-08	16.6551	3.35457	0.738401	4.54302	5.54534e-06	0.000363904
Gh_D02G0917	21.0303	1.43022	0.473924	3.01783	0.0025459	0.0134917	8.21973	3.17236	0.997919	3.17898	0.00147796	0.0313843
Gh_D02G0992	51.1072	3.2049	0.377174	8.49714	1.94315e-17	1.03392e-15	41.126	4.90427	0.66039	7.42632	1.11662e-13	5.34675e-11
Gh_D02G1057	11.586	2.75875	0.762597	3.61757	0.000297384	0.00216838	14.4379	2.79584	0.746357	3.74598	0.000179688	0.006219
Gh_D02G1150	491.573	2.8778	0.150536	19.117	1.82266e-81	2.09129e-78	539.096	3.0235	0.21552	14.0289	1.03769e-44	2.16299e-40
Gh_D02G1269	8.49825	5.54291	1.35239	4.09862	4.15628e-05	0.000386951	5.53948	4.93686	1.56649	3.15155	0.00162404	0.0337141
Gh_D02G1334	12.0873	3.47353	0.78825	4.40663	1.04992e-05	0.000113785	13.8348	3.23653	0.774364	4.1796	2.92028e-05	0.00144436
Gh_D02G1447	141.655	1.15455	0.225139	5.12815	2.9261e-07	4.36312e-06	100.537	1.66732	0.306218	5.44488	5.18405e-08	6.80391e-06
Gh_D02G1456	56.1834	2.65846	0.334811	7.94017	2.01903e-15	8.75549e-14	64.7614	1.1736	0.368629	3.18368	0.00145415	0.0310908
Gh_D02G1480	13.7231	1.54283	0.583529	2.64397	0.00819405	0.0352124	15.4316	1.9834	0.646764	3.06666	0.00216465	0.0413154
Gh_D02G1656	15.2636	4.88217	0.963996	5.06451	4.09448e-07	5.96018e-06	15.7284	3.9073	0.920446	4.245	2.1859e-05	0.00115243
Gh_D02G1677	2.59917	4.81645	1.63504	2.94576	0.00322164	0.0163951	13.1611	4.69295	1.04038	4.5108	6.45842e-06	0.000412638
Gh_D02G1771	279.531	1.40821	0.168631	8.35082	6.77914e-17	3.45111e-15	235.52	1.94025	0.254923	7.6111	2.71773e-14	1.46201e-11
Gh_D02G1774	323.194	1.39211	0.145508	9.56727	1.09767e-21	8.39636e-20	207.656	1.54063	0.292902	5.25987	1.4416e-07	1.66181e-05
Gh_D02G1816	8.71651	2.69179	0.804263	3.34691	0.000817185	0.00514671	20.2635	4.5687	0.806818	5.66261	1.49087e-08	2.27144e-06
Gh_D02G1929	57.1996	2.39523	0.344096	6.96093	3.38022e-12	1.0346e-10	68.6466	2.26499	0.382584	5.92023	3.21485e-09	5.69446e-07
Gh_D02G1986	10.6052	3.26884	0.839956	3.89168	9.95526e-05	0.000833136	17.5324	1.72355	0.574053	3.00243	0.00267834	0.0484458
Gh_D02G2086	22.9353	1.43271	0.464353	3.08539	0.00203288	0.0111726	7.66844	4.48275	1.31138	3.41834	0.000630042	0.0165482
Gh_D02G2103	36.5927	5.42092	0.766048	7.07647	1.47877e-12	4.72321e-11	26.838	2.34601	0.657648	3.56727	0.000360723	0.0105968
Gh_D02G2369	10.0297	2.01063	0.702573	2.86181	0.00421229	0.0204949	10.7619	2.84782	0.791742	3.5969	0.000322036	0.00973121
Gh_D03G0018	70.8541	3.34527	0.363779	9.19588	3.71951e-20	2.49536e-18	48.9796	3.95362	0.471856	8.37888	5.34324e-17	5.04743e-14
Gh_D03G0088	22.7117	5.47371	0.942408	5.80822	6.31396e-09	1.26926e-07	14.5151	2.69261	0.820206	3.28285	0.00102765	0.0241105
Gh_D03G0109	18.3299	7.6402	1.29692	5.89104	3.83778e-09	7.94692e-08	17.6168	3.01064	0.814854	3.69469	0.000220152	0.00725088
Gh_D03G0254	22.9512	2.55898	0.560791	4.56316	5.03905e-06	5.89048e-05	19.1908	1.78485	0.594234	3.00362	0.00266788	0.0483369
Gh_D03G0451	80.3389	2.78591	0.302316	9.21524	3.10581e-20	2.10255e-18	211.39	1.02433	0.328103	3.12198	0.0017964	0.0362153
Gh_D03G0483	12.3003	2.36213	0.696054	3.3936	0.000689808	0.00446385	23.2447	3.20532	0.635823	5.04122	4.62581e-07	4.45941e-05
Gh_D03G0625	38.5292	2.12399	0.395203	5.37444	7.68226e-08	1.28319e-06	61.7218	1.85811	0.38835	4.78464	1.71298e-06	0.000134975
Gh_D03G0707	11.7491	1.75749	0.645114	2.72431	0.00644368	0.0290843	18.4478	2.59608	0.693656	3.74261	0.00018212	0.00627824
Gh_D03G0955	13.2622	6.19602	1.33956	4.62542	3.73846e-06	4.51766e-05	3.72263	5.36656	1.62211	3.30838	0.000938384	0.0224789
Gh_D03G0985	29.5705	2.60784	0.44519	5.85781	4.69023e-09	9.62746e-08	47.0933	1.80564	0.385307	4.68623	2.78286e-06	0.000202438
Gh_D03G1053	29.7355	2.75869	0.452046	6.10267	1.04312e-09	2.32574e-08	32.68	3.50317	0.530285	6.6062	3.94301e-11	1.12296e-08
Gh_D03G1059	153.94	6.8373	0.541792	12.6198	1.64274e-36	3.01268e-34	92.2196	3.90214	0.393953	9.90509	3.95619e-23	7.49508e-20
Gh_D03G1188	192.798	1.65259	0.180131	9.17437	4.54204e-20	3.03354e-18	156.636	1.87642	0.265409	7.06992	1.55023e-12	5.92541e-10
Gh_D03G1283	162.951	1.87558	0.207062	9.05806	1.32787e-19	8.51281e-18	127.328	1.85929	0.286626	6.48681	8.76704e-11	2.28752e-08
Gh_D03G1443	406.79	4.90065	0.208801	23.4704	8.1831e-122	4.156e-118	380.711	2.9581	0.274569	10.7736	4.58816e-27	1.33283e-23
Gh_D03G1458	13.6766	2.28113	0.677252	3.36822	0.000756545	0.00482111	16.9024	2.16144	0.700153	3.08709	0.00202125	0.0395482
Gh_D03G1463	144.7	5.9276	0.58637	10.109	5.04098e-24	4.60355e-22	144.767	3.60305	0.430129	8.37668	5.44428e-17	5.04743e-14
Gh_D03G1483	12.7643	6.13687	1.29575	4.73616	2.17807e-06	2.7579e-05	9.07927	5.66597	1.41374	4.00778	6.12926e-05	0.00264957
Gh_D03G1549	34.5007	4.15878	0.56119	7.41064	1.25687e-13	4.53934e-12	23.7771	2.72776	0.618663	4.40912	1.0379e-05	0.000612513
Gh_D03G1579	23.6037	7.033	1.25369	5.60984	2.02516e-08	3.71858e-07	15.8296	6.47652	1.3591	4.76531	1.88563e-06	0.000144402
Gh_D03G1704	27.8049	5.76891	0.931993	6.18986	6.02175e-10	1.39401e-08	15.9195	3.31193	0.799928	4.14029	3.46866e-05	0.00167937
Gh_D03G1706	8.87475	3.63282	0.964333	3.76718	0.000165101	0.00130093	8.76762	4.07625	1.09791	3.71273	0.000205039	0.00692052
Gh_D03G1808	80.8444	1.68302	0.257803	6.52831	6.65138e-11	1.74464e-09	79.9397	1.43498	0.352982	4.06532	4.7967e-05	0.00217494
Gh_D04G0210	12.1019	3.23458	0.766312	4.22098	2.43246e-05	0.000240017	17.244	2.16676	0.600542	3.608	0.000308565	0.00943721
Gh_D04G0262	57.0959	1.09139	0.321679	3.3928	0.000691811	0.00447487	71.8069	1.30084	0.376228	3.45758	0.000545049	0.0147699
Gh_D04G0365	34.3414	3.14447	0.465398	6.75653	1.4134e-11	4.01058e-10	32.3781	1.74296	0.536548	3.24846	0.00116029	0.0261152
Gh_D04G0406	53.1718	2.46636	0.369814	6.66917	2.57247e-11	7.05782e-10	56.6201	1.7112	0.358698	4.7706	1.83676e-06	0.000141906
Gh_D04G0489	16.1523	2.02926	0.553551	3.6659	0.000246468	0.00184184	43.2286	1.2233	0.390421	3.13328	0.00172865	0.0351983
Gh_D04G0532	66.119	3.7736	0.368504	10.2403	1.30789e-24	1.25322e-22	63.0826	4.51553	0.534916	8.44158	3.13081e-17	3.1005e-14
Gh_D04G0638	55.9508	1.27721	0.288459	4.42771	9.52377e-06	0.000104479	46.0823	1.27284	0.365978	3.4779	0.000505351	0.0139456
Gh_D04G0853	82.9502	3.91187	0.353599	11.063	1.89644e-28	2.25696e-26	49.0126	2.96726	0.46387	6.39674	1.58728e-10	3.90758e-08
Gh_D04G0926	59.5996	1.28311	0.278461	4.60788	4.06787e-06	4.86708e-05	60.9197	1.06573	0.324684	3.28237	0.0010294	0.0241156
Gh_D04G1116	3.5623	5.2822	1.59358	3.31466	0.000917536	0.00568984	3.56243	5.29399	1.6647	3.18015	0.00147199	0.0313032
Gh_D04G1147	43.1269	3.65648	0.468427	7.80588	5.90884e-15	2.46191e-13	33.3687	2.86124	0.552781	5.17608	2.26592e-07	2.44642e-05
Gh_D04G1172	5.05151	3.20052	1.25425	2.55175	0.0107184	0.0437098	4.59453	5.671	1.59697	3.55109	0.000383635	0.0111369
Gh_D04G1189	27.2854	1.57628	0.433474	3.63639	0.000276489	0.0020413	23.9282	2.74095	0.539347	5.08197	3.73542e-07	3.71615e-05
Gh_D04G1214	51.9467	2.03517	0.331224	6.1444	8.02686e-10	1.82699e-08	70.4104	1.16766	0.36308	3.21598	0.00130002	0.0284229
Gh_D04G1221	136.71	1.72566	0.243286	7.09313	1.31108e-12	4.2056e-11	83.9971	1.51393	0.33688	4.49399	6.99003e-06	0.00043825
Gh_D04G1223	17.0259	4.02946	1.3674	2.9468	0.0032108	0.016357	9.41056	4.18599	1.0633	3.93678	8.25814e-05	0.00336929
Gh_D04G1272	106.283	1.95101	0.238751	8.17175	3.03955e-16	1.44388e-14	86.4397	1.18095	0.285641	4.1344	3.55879e-05	0.00171728
Gh_D04G1883	38.3445	1.27836	0.34738	3.68	0.000233232	0.00175672	43.6268	1.10827	0.368405	3.00829	0.00262722	0.047759
Gh_D05G0023	13.7205	5.32365	1.13574	4.68737	2.76734e-06	3.43408e-05	17.6165	2.40423	0.674034	3.56693	0.000361194	0.0105984
Gh_D05G0208	8.62235	4.63727	1.2644	3.66756	0.000244874	0.00183208	8.94801	3.67962	1.07813	3.41296	0.000642618	0.0167975
Gh_D05G0232	94.5347	1.59042	0.26055	6.10409	1.03385e-09	2.30886e-08	79.7894	1.57198	0.375948	4.18137	2.89758e-05	0.00143639
Gh_D05G0339	147.423	1.34663	0.231192	5.82473	5.72045e-09	1.1567e-07	93.473	2.0299	0.295309	6.87382	6.25061e-12	2.07567e-09
Gh_D05G0432	41.8691	1.19485	0.374716	3.18869	0.00142918	0.00831097	68.485	3.87047	0.485149	7.97791	1.48831e-15	1.01102e-12
Gh_D05G0453	17.1211	7.53523	1.2715	5.92624	3.09947e-09	6.53913e-08	23.1496	2.36411	0.629241	3.75708	0.00017191	0.00602154
Gh_D05G0490	30.9227	3.5108	0.52056	6.74426	1.53809e-11	4.3451e-10	41.5189	2.3661	0.475493	4.97609	6.48823e-07	5.92701e-05
Gh_D05G0614	15.0962	1.72058	0.575615	2.98912	0.0027978	0.0146069	26.7266	1.42716	0.457762	3.1177	0.00182271	0.0366504
Gh_D05G0624	41.18	1.4218	0.33882	4.19634	2.7126e-05	0.000264164	62.1057	1.61644	0.338218	4.77928	1.75928e-06	0.000137382
Gh_D05G0766	34.9355	2.57929	0.420013	6.14098	8.20126e-10	1.86384e-08	28.4464	1.95672	0.51562	3.79489	0.000147712	0.00533255
Gh_D05G0767	114.829	1.7741	0.228154	7.77592	7.49014e-15	3.07228e-13	104.652	1.66496	0.271519	6.132	8.67815e-10	1.77531e-07
Gh_D05G0780	19.6403	5.26457	0.97499	5.39961	6.67848e-08	1.12646e-06	17.9256	2.35922	0.713054	3.30861	0.000937591	0.0224789
Gh_D05G0822	17.1322	2.7797	0.619057	4.49022	7.11511e-06	8.06247e-05	27.4229	3.15119	0.539308	5.84303	5.12612e-09	8.86372e-07
Gh_D05G0901	246.588	4.0349	0.214749	18.7889	9.30443e-79	9.25233e-76	120.179	2.25843	0.393464	5.73986	9.47541e-09	1.54637e-06
Gh_D05G0902	683.598	2.26717	0.150845	15.0298	4.68423e-51	1.56425e-48	356.162	1.54439	0.243291	6.3479	2.18279e-10	5.11359e-08
Gh_D05G0913	6.52111	4.21039	1.24511	3.38155	0.000720785	0.00462548	2.92251	5.00752	1.67336	2.9925	0.00276703	0.0496788
Gh_D05G0929	43.7997	2.16468	0.360085	6.0116	1.83705e-09	3.98085e-08	42.8849	2.34581	0.402777	5.8241	5.74203e-09	9.77356e-07
Gh_D05G0938	25.5646	6.24328	1.08452	5.75674	8.57557e-09	1.68455e-07	20.341	3.5154	0.656964	5.35098	8.74774e-08	1.07088e-05
Gh_D05G0972	260.849	2.22986	0.176939	12.6025	2.0467e-36	3.7382e-34	257.681	1.21866	0.252192	4.83229	1.34974e-06	0.000110969
Gh_D05G1003	744.455	1.67028	0.166538	10.0294	1.13225e-23	9.954e-22	978.242	2.13087	0.292525	7.28442	3.23057e-13	1.45122e-10
Gh_D05G1137	59.4126	1.3284	0.329878	4.02693	5.65103e-05	0.000508082	46.3234	1.84111	0.414456	4.44223	8.90324e-06	0.00054032
Gh_D05G1147	163.079	2.01454	0.210985	9.54826	1.31892e-21	1.00202e-19	156.093	1.26455	0.27859	4.5391	5.64942e-06	0.000367415
Gh_D05G1184	4195.2	1.20226	0.101704	11.8211	3.03618e-32	4.58996e-30	4478.1	1.10935	0.184316	6.01876	1.75761e-09	3.30113e-07
Gh_D05G1206	46.6646	2.45555	0.356282	6.89217	5.49484e-12	1.6447e-10	45.3559	2.10571	0.382817	5.50055	3.78598e-08	5.22059e-06
Gh_D05G1321	60.5117	3.69757	0.397484	9.30244	1.37259e-20	9.68782e-19	29.6498	1.44468	0.471304	3.06528	0.00217468	0.041434
Gh_D05G1424	13.578	5.31159	1.15665	4.59223	4.38534e-06	5.19988e-05	10.0298	3.21163	0.982184	3.26988	0.00107591	0.0248447
Gh_D05G1428	13.7637	3.03254	0.680611	4.45562	8.36525e-06	9.31165e-05	14.3842	2.25259	0.73241	3.07558	0.00210093	0.040579
Gh_D05G1434	82.7366	3.51454	0.328703	10.6921	1.10798e-26	1.21817e-24	54.4762	1.61364	0.373588	4.31929	1.5653e-05	0.000867764
Gh_D05G1458	14.8124	4.40757	0.904095	4.87512	1.08743e-06	1.47367e-05	15.5633	2.5139	0.824982	3.04722	0.00230971	0.0433248
Gh_D05G1546	26.8055	2.18947	0.46774	4.68095	2.85547e-06	3.52681e-05	39.7839	2.21434	0.428918	5.16263	2.43502e-07	2.60697e-05
Gh_D05G1588	61.779	1.47183	0.29249	5.03208	4.85188e-07	6.95425e-06	71.0523	1.27256	0.352728	3.60777	0.000308842	0.00943721
Gh_D05G1645	122.015	1.12553	0.218405	5.15339	2.5582e-07	3.86737e-06	76.6556	1.96402	0.343565	5.7166	1.08677e-08	1.74742e-06
Gh_D05G1703	8.9709	6.6134	1.39435	4.74298	2.10593e-06	2.67564e-05	10.2277	2.75645	0.854415	3.22612	0.00125481	0.0276565
Gh_D05G1709	60.5883	1.22604	0.343671	3.56748	0.000360438	0.00256502	66.3411	1.56611	0.319527	4.90134	9.51852e-07	8.14745e-05
Gh_D05G1826	365.098	1.66336	0.144079	11.5447	7.84971e-31	1.08413e-28	342.669	1.56318	0.25729	6.07554	1.23573e-09	2.44753e-07
Gh_D05G1878	7.08556	2.34294	0.928027	2.52465	0.0115815	0.0465507	11.2834	2.7429	0.780386	3.5148	0.000440087	0.0124119
Gh_D05G1996	44.239	1.77383	0.350626	5.05905	4.21357e-07	6.11973e-06	52.074	1.92806	0.357677	5.39049	7.02648e-08	8.92629e-06
Gh_D05G2106	38.8066	4.07631	0.552854	7.37322	1.66561e-13	5.93413e-12	35.3856	2.51736	0.554403	4.54067	5.60759e-06	0.000366382
Gh_D05G2161	103.499	1.64406	0.236772	6.94366	3.82076e-12	1.16466e-10	117.569	1.56443	0.330401	4.73495	2.19106e-06	0.000164326
Gh_D05G2202	53.499	1.99861	0.317796	6.28898	3.19562e-10	7.63877e-09	40.268	2.33691	0.462234	5.05569	4.28832e-07	4.18967e-05
Gh_D05G2340	219.421	1.67429	0.178374	9.3864	6.20887e-21	4.5103e-19	170.524	1.46242	0.358013	4.08482	4.41107e-05	0.00203012
Gh_D05G2768	420.992	1.24729	0.160131	7.7892	6.74322e-15	2.79136e-13	407.785	1.04182	0.296281	3.51632	0.000437568	0.012359
Gh_D05G2914	67.2554	3.34077	0.693712	4.81579	1.46618e-06	1.92854e-05	88.4479	1.33203	0.443397	3.00414	0.00266331	0.0482741
Gh_D05G3030	49.8109	4.23827	0.463261	9.14877	5.75853e-20	3.82887e-18	33.289	2.47187	0.456717	5.41227	6.22325e-08	7.99917e-06
Gh_D05G3034	31.5631	2.40426	0.456958	5.26143	1.42937e-07	2.25613e-06	34.6552	3.09717	0.496983	6.23195	4.60659e-10	1.00364e-07
Gh_D05G3110	6.07822	4.09531	1.26113	3.24734	0.00116489	0.00699967	9.59426	3.43611	0.93553	3.6729	0.00023981	0.00776912
Gh_D05G3161	13.6482	4.29573	0.923073	4.65373	3.25988e-06	3.98125e-05	8.92461	3.29242	1.08372	3.03807	0.002381	0.0443945
Gh_D05G3509	350.976	1.59795	0.190455	8.39019	4.8535e-17	2.49351e-15	251.213	1.15748	0.263249	4.39691	1.09801e-05	0.000639634
Gh_D05G3510	132.238	1.5417	0.225518	6.83626	8.12862e-12	2.38988e-10	92.485	1.44114	0.302616	4.76226	1.9144e-06	0.000146348
Gh_D05G3569	9.72245	5.73327	1.31294	4.36675	1.26111e-05	0.00013363	18.0772	1.98544	0.583724	3.40133	0.00067058	0.0173103
Gh_D05G3650	26.2192	6.27439	1.09948	5.70666	1.15214e-08	2.2108e-07	14.2918	3.52451	0.858492	4.10546	4.03506e-05	0.00189437
Gh_D05G3882	17.2652	1.43215	0.516717	2.77164	0.00557755	0.0258155	16.0137	2.59716	0.667119	3.8931	9.89716e-05	0.00387127
Gh_D05G3929	13.274	1.77168	0.644166	2.75035	0.0059532	0.0272136	9.10784	3.03918	0.892113	3.40672	0.000657486	0.0170735
Gh_D06G0056	22.2322	3.78755	0.627442	6.0365	1.57498e-09	3.43455e-08	22.7062	2.16116	0.532589	4.05784	4.9529e-05	0.00222722
Gh_D06G0251	106.036	2.62116	0.270967	9.67334	3.91373e-22	3.0671e-20	61.3522	2.02255	0.437687	4.62101	3.81877e-06	0.000267953
Gh_D06G0383	49.6617	2.02581	0.358082	5.65739	1.53692e-08	2.88361e-07	47.064	1.52217	0.358729	4.24323	2.20322e-05	0.00115666
Gh_D06G0459	93.2683	2.73572	0.266121	10.28	8.6718e-25	8.50977e-23	74.3071	2.08875	0.323213	6.46245	1.0302e-10	2.62514e-08
Gh_D06G0461	50.0797	1.99383	0.340622	5.8535	4.81343e-09	9.84872e-08	50.4816	1.28259	0.415058	3.09015	0.00200059	0.0392866
Gh_D06G0618	6.87129	5.22618	1.36765	3.8213	0.000132752	0.00107363	16.4718	3.34591	0.783536	4.27027	1.95234e-05	0.00105026
Gh_D06G0636	44.8587	1.95558	0.354727	5.51291	3.52948e-08	6.23026e-07	42.8338	1.31078	0.404811	3.23801	0.00120365	0.026831
Gh_D06G0865	4.4503	5.59788	1.46213	3.82859	0.000128882	0.00104687	6.32822	4.20456	1.37688	3.05369	0.00226044	0.0426577
Gh_D06G0915	17.2731	1.49692	0.520612	2.87531	0.00403632	0.019798	27.5025	3.2548	0.595224	5.46819	4.54645e-08	6.13334e-06
Gh_D06G0982	28.3863	3.07881	0.532429	5.78257	7.35673e-09	1.46376e-07	20.9345	2.92489	0.665401	4.39568	1.10427e-05	0.000641565
Gh_D06G1167	4.52011	4.60161	1.44519	3.18409	0.00145211	0.00842571	8.58417	4.03583	1.08688	3.71321	0.000204648	0.00691801
Gh_D06G1301	150.777	3.08546	0.495497	6.22699	4.75491e-10	1.11458e-08	166.141	2.48229	0.252745	9.82133	9.11322e-23	1.65458e-19
Gh_D06G1416	192.203	1.50524	0.188715	7.97626	1.50832e-15	6.66283e-14	210.476	1.34387	0.246763	5.44598	5.15205e-08	6.78234e-06
Gh_D06G1471	2.19096	4.56091	1.74682	2.61098	0.00902831	0.0380664	3.21945	5.15896	1.70184	3.03141	0.00243414	0.0451083
Gh_D06G1553	368.015	1.90539	0.18055	10.5533	4.90611e-26	5.22711e-24	344.027	1.64663	0.246899	6.66923	2.57148e-11	7.42051e-09
Gh_D06G1554	27.4186	4.2923	0.621291	6.90868	4.8919e-12	1.47409e-10	21.0952	4.37746	0.815751	5.36618	8.04234e-08	9.92739e-06
Gh_D06G1781	162.691	1.56123	0.213474	7.31346	2.60353e-13	9.08051e-12	128.811	2.29588	0.380274	6.03742	1.566e-09	2.95397e-07
Gh_D06G1793	115.286	1.37077	0.229629	5.9695	2.37988e-09	5.08815e-08	133.063	1.62192	0.275027	5.89733	3.69438e-09	6.46501e-07
Gh_D06G1869	105.886	1.37267	0.231489	5.92974	3.03423e-09	6.41359e-08	94.662	1.01292	0.273102	3.70895	0.000208122	0.00697594
Gh_D06G1958	24.5083	2.22807	0.530055	4.20347	2.62852e-05	0.000257388	23.6865	1.94709	0.628722	3.0969	0.00195557	0.038562
Gh_D06G2326	193.985	5.1899	0.308133	16.843	1.1802e-63	6.51993e-61	98.0523	2.9965	0.402901	7.43732	1.02746e-13	5.03038e-11
Gh_D06G2356	247.586	2.32694	0.176668	13.1712	1.28465e-39	2.87428e-37	297.887	1.17469	0.258035	4.55245	5.3025e-06	0.000348493
Gh_D07G0091	44.1835	2.81769	0.40662	6.92954	4.22217e-12	1.28352e-10	11.0605	2.19587	0.728707	3.01338	0.00258354	0.047132
Gh_D07G0162	192.907	5.75743	0.359544	16.0132	1.03405e-57	4.53646e-55	69.6157	2.74511	0.367136	7.47708	7.59922e-14	3.85033e-11
Gh_D07G0187	19.3001	1.64481	0.499735	3.29137	0.000997005	0.00612157	8.36591	2.88273	0.945754	3.04807	0.00230313	0.0432385
Gh_D07G0224	179.728	4.07976	0.269689	15.1276	1.06437e-51	3.69212e-49	55.6205	2.15853	0.39141	5.51476	3.49259e-08	4.86218e-06
Gh_D07G0302	67.8047	1.13054	0.289095	3.91063	9.20558e-05	0.000777376	73.6356	1.66572	0.320547	5.19649	2.03083e-07	2.24598e-05
Gh_D07G0308	11.264	4.42581	0.990387	4.46877	7.86704e-06	8.83177e-05	13.1304	2.64288	0.736219	3.5898	0.000330927	0.00993101
Gh_D07G0401	27.2328	1.13336	0.421115	2.69134	0.00711656	0.0314551	34.0724	1.86331	0.454432	4.1003	4.12617e-05	0.00192499
Gh_D07G0463	39.4047	3.28571	0.458231	7.17043	7.47648e-13	2.4967e-11	40.9401	2.2797	0.424784	5.36673	8.01779e-08	9.92521e-06
Gh_D07G0672	22.8853	2.30574	0.534031	4.3176	1.57732e-05	0.000163157	35.6659	2.39917	0.569814	4.21044	2.54869e-05	0.00130501
Gh_D07G0689	3971.23	3.68761	0.147399	25.0179	3.9076e-138	2.9143e-134	2413.48	1.36705	0.245255	5.57399	2.48971e-08	3.62832e-06
Gh_D07G0690	453.489	3.089	0.165686	18.6437	1.42048e-77	1.35242e-74	149.095	1.90033	0.314473	6.04288	1.51384e-09	2.87934e-07
Gh_D07G0961	7.52027	4.42815	1.22746	3.60759	0.000309058	0.00224108	15.278	6.42023	1.32416	4.84854	1.2437e-06	0.000103422
Gh_D07G1003	38.3805	1.57343	0.399441	3.93909	8.17923e-05	0.000700755	34.0928	3.57873	0.543278	6.5873	4.47901e-11	1.24637e-08
Gh_D07G1055	21.9306	3.31951	0.585921	5.66545	1.4664e-08	2.76491e-07	20.5005	1.91269	0.610516	3.13291	0.00173084	0.0352264
Gh_D07G1078	90.3491	1.49295	0.242121	6.16612	6.9988e-10	1.6036e-08	78.1124	1.43654	0.348246	4.12507	3.70627e-05	0.001765
Gh_D07G1247	20.0896	4.86453	0.839957	5.79141	6.97995e-09	1.39562e-07	24.007	1.90275	0.57841	3.28962	0.00100323	0.0236296
Gh_D07G1259	17.6217	1.40275	0.508122	2.76066	0.00576855	0.0265403	22.5375	3.67728	0.677415	5.4284	5.68626e-08	7.35231e-06
Gh_D07G1319	146.29	2.18671	0.224998	9.7188	2.50718e-22	1.98921e-20	207.42	3.06798	0.259136	11.8393	2.44607e-32	1.18428e-28
Gh_D07G1320	19.5075	3.42014	0.623389	5.48637	4.1028e-08	7.15759e-07	17.1036	3.24165	0.694509	4.66754	3.04829e-06	0.000220642
Gh_D07G1353	129.856	1.81202	0.223766	8.09785	5.59392e-16	2.60205e-14	131.932	2.21167	0.363549	6.08356	1.17545e-09	2.34949e-07
Gh_D07G1372	22.9023	2.47528	0.499178	4.95871	7.09638e-07	9.9172e-06	13.8766	3.26347	0.795243	4.10374	4.06528e-05	0.00190474
Gh_D07G1385	15.1068	2.01298	0.571258	3.52376	0.000425463	0.00296459	16.8345	2.11235	0.639657	3.30232	0.000958897	0.0228822
Gh_D07G1426	68.482	1.14692	0.273673	4.19085	2.77917e-05	0.00027006	88.4208	1.19261	0.303525	3.92921	8.52269e-05	0.00343859
Gh_D07G1434	2.81539	4.92725	1.63782	3.00842	0.00262608	0.0138314	4.77293	4.70516	1.4977	3.14158	0.00168038	0.0345545
Gh_D07G1506	63.2133	1.59465	0.293513	5.43298	5.54204e-08	9.46547e-07	86.0003	1.19311	0.29063	4.10525	4.0388e-05	0.00189437
Gh_D07G1557	38.0384	4.78177	0.635562	7.52369	5.3251e-14	1.99906e-12	50.4231	4.75917	0.570176	8.34684	7.0114e-17	6.235e-14
Gh_D07G1700	81.2012	2.71988	0.29057	9.3605	7.93591e-21	5.72768e-19	96.4543	2.17434	0.296539	7.33238	2.26106e-13	1.05939e-10
Gh_D07G1739	25.8796	1.67599	0.469166	3.57227	0.0003539	0.00252372	27.2092	1.50152	0.484433	3.09955	0.00193813	0.0383689
Gh_D07G1773	179.992	1.22949	0.191635	6.41578	1.40105e-10	3.53804e-09	214.527	1.09111	0.278385	3.91943	8.87603e-05	0.00354572
Gh_D07G1792	69.0993	1.06429	0.30035	3.54351	0.000394841	0.00277848	105.406	1.44581	0.272308	5.30945	1.0996e-07	1.29497e-05
Gh_D07G1877	4.92586	3.1563	1.20148	2.62701	0.00861377	0.0366048	5.11028	5.82354	1.5244	3.82022	0.000133331	0.00489451
Gh_D07G1930	18.2864	3.47681	0.655907	5.30076	1.15319e-07	1.85422e-06	10.2032	5.82034	1.34783	4.31831	1.5723e-05	0.000870537
Gh_D07G2086	15.5584	3.6236	0.757046	4.78651	1.6971e-06	2.2044e-05	30.9572	2.04227	0.476123	4.28937	1.79182e-05	0.000973525
Gh_D07G2181	31.7463	4.33903	0.652587	6.64897	2.95159e-11	8.00955e-10	35.3611	2.52492	0.564314	4.47431	7.66576e-06	0.000473127
Gh_D07G2317	56.0482	6.3758	0.775502	8.22151	2.00958e-16	9.74266e-15	54.0111	3.37819	0.466914	7.23514	4.65035e-13	2.00628e-10
Gh_D07G2336	422.188	1.20637	0.143176	8.42579	3.58333e-17	1.85802e-15	290.25	1.26248	0.247943	5.09181	3.54655e-07	3.56077e-05
Gh_D07G2423	48.7446	2.73891	0.373425	7.33457	2.22432e-13	7.79435e-12	34.7349	2.5893	0.484569	5.34351	9.11661e-08	1.10963e-05
Gh_D07G2488	22.3722	6.95456	1.26612	5.49281	3.95595e-08	6.91758e-07	18.2196	5.19316	1.04923	4.94951	7.44024e-07	6.63338e-05
Gh_D08G0168	19.8948	3.79932	0.74169	5.12252	3.01475e-07	4.48037e-06	27.9829	1.54548	0.504778	3.0617	0.00220083	0.0418124
Gh_D08G0260	11.1552	1.80608	0.702407	2.57128	0.0101325	0.0417916	20.9356	2.0517	0.557325	3.68133	0.00023202	0.0075674
Gh_D08G0366	26.269	1.85969	0.44453	4.1835	2.87052e-05	0.000278211	35.32	1.45943	0.428243	3.40794	0.000654542	0.0170173
Gh_D08G0426	24.5682	4.55791	0.718892	6.34019	2.29479e-10	5.58082e-09	19.1055	2.55417	0.790075	3.23282	0.00122577	0.0271953
Gh_D08G0434	14.4727	5.4104	1.18266	4.57477	4.76742e-06	5.60591e-05	12.4488	2.88028	0.797769	3.61042	0.000305705	0.00938764
Gh_D08G0499	210.812	4.13705	0.240708	17.187	3.32202e-66	1.98205e-63	163.276	3.44605	0.329846	10.4474	1.50553e-25	3.45273e-22
Gh_D08G0503	42.6148	1.31827	0.339717	3.88051	0.000104238	0.000867966	76.891	1.12596	0.318512	3.53507	0.000407668	0.0116484
Gh_D08G0665	22.1352	3.33066	0.583217	5.71083	1.12423e-08	2.16189e-07	16.714	3.36551	0.69328	4.85447	1.20707e-06	0.00010076
Gh_D08G0680	345.612	4.67846	0.3919	11.9379	7.51128e-33	1.17523e-30	197.555	2.35322	0.368785	6.381	1.75935e-10	4.23545e-08
Gh_D08G0734	24.7561	1.38732	0.447294	3.10158	0.0019249	0.0106656	26.5326	1.81694	0.499723	3.6359	0.000277016	0.00873421
Gh_D08G0845	75.8305	2.61007	0.304078	8.58356	9.19811e-18	5.01336e-16	43.3186	2.26059	0.41311	5.47214	4.44641e-08	6.03575e-06
Gh_D08G1003	28.7866	4.79152	0.714691	6.70433	2.02337e-11	5.62371e-10	21.9653	6.04026	1.15859	5.21344	1.85369e-07	2.06053e-05
Gh_D08G1123	525.683	7.52711	0.385755	19.5127	8.56661e-85	1.23658e-81	219.434	3.34442	0.335648	9.96408	2.18897e-23	4.542e-20
Gh_D08G1157	533.563	1.425	0.156409	9.11073	8.18315e-20	5.34569e-18	461.104	1.4363	0.234634	6.12146	9.27199e-10	1.87915e-07
Gh_D08G1197	215.112	1.44847	0.178998	8.09209	5.86499e-16	2.71966e-14	236.853	1.5318	0.239295	6.40129	1.54069e-10	3.81444e-08
Gh_D08G1205	189.276	1.62271	0.22101	7.34223	2.10068e-13	7.39005e-12	148.212	1.10001	0.271782	4.04738	5.17943e-05	0.0023053
Gh_D08G1232	69.024	1.44836	0.286983	5.04684	4.49171e-07	6.4879e-06	33.4611	1.87767	0.486732	3.85771	0.000114453	0.00433668
Gh_D08G1467	96.0911	1.26198	0.235196	5.36564	8.0664e-08	1.34384e-06	95.4082	1.23317	0.279426	4.41323	1.01842e-05	0.000603763
Gh_D08G1632	19.0578	2.84525	0.586729	4.84934	1.23875e-06	1.65813e-05	20.3928	2.40208	0.595985	4.03043	5.56752e-05	0.00243818
Gh_D08G1683	111.577	2.02149	0.226148	8.93879	3.93469e-19	2.4252e-17	126.251	1.222	0.263726	4.6336	3.59368e-06	0.000253795
Gh_D08G1687	19.9966	2.23838	0.512627	4.36648	1.26264e-05	0.000133729	21.7774	2.18076	0.527016	4.13794	3.50432e-05	0.00169475
Gh_D08G1765	125.402	1.94206	0.214851	9.03907	1.5801e-19	1.00722e-17	131.345	2.02512	0.276174	7.33276	2.25468e-13	1.05939e-10
Gh_D08G1839	62.4692	7.5423	1.0505	7.17972	6.9852e-13	2.33787e-11	29.6592	3.6736	0.629338	5.83724	5.30733e-09	9.10478e-07
Gh_D08G1936	37.7474	5.7936	0.785959	7.37138	1.68866e-13	6.00668e-12	35.3826	2.4714	0.537243	4.60015	4.22182e-06	0.000291078
Gh_D08G1969	11.9695	5.12498	1.16444	4.40126	1.07626e-05	0.000116302	42.1004	5.37271	0.711354	7.55279	4.26035e-14	2.23191e-11
Gh_D08G1970	369.353	2.36906	0.156685	15.1199	1.19801e-51	4.12375e-49	336.647	1.27858	0.257465	4.96605	6.83311e-07	6.21599e-05
Gh_D08G2063	92.6113	1.33136	0.25445	5.23232	1.67398e-07	2.61183e-06	118.435	1.0579	0.266974	3.96254	7.41569e-05	0.00309513
Gh_D08G2124	9.87906	3.13338	0.845538	3.70579	0.000210736	0.00160785	24.9531	2.83701	0.615222	4.61137	4.00031e-06	0.000278006
Gh_D08G2126	126.494	3.16571	0.244616	12.9415	2.62414e-38	5.5129e-36	100.93	2.07981	0.358465	5.80198	6.55369e-09	1.10686e-06
Gh_D08G2141	98.1851	2.59412	0.297994	8.70527	3.1683e-18	1.81996e-16	75.4489	3.42994	0.403635	8.49762	1.93518e-17	1.96101e-14
Gh_D08G2171	105.137	2.36086	0.261669	9.02234	1.84115e-19	1.17028e-17	95.1116	1.80184	0.443728	4.0607	4.89264e-05	0.00220239
Gh_D08G2192	319.19	1.7059	0.14949	11.4115	3.6645e-30	4.85145e-28	302.761	2.16091	0.234508	9.21466	3.12265e-20	4.12322e-17
Gh_D08G2213	35.8665	3.95628	0.55994	7.06554	1.5999e-12	5.09192e-11	34.4257	1.81256	0.598749	3.02725	0.00246792	0.0454917
Gh_D08G2273	586.387	2.70979	0.14161	19.1356	1.27585e-81	1.50242e-78	422.712	2.02132	0.241551	8.36807	5.85673e-17	5.31669e-14
Gh_D08G2354	25.336	1.6865	0.431334	3.90997	9.23083e-05	0.00077892	34.5292	1.39652	0.406865	3.43239	0.000598287	0.0159156
Gh_D08G2362	32.2745	7.48447	1.52437	4.90987	9.11355e-07	1.24941e-05	16.2279	3.72181	0.822656	4.52414	6.06408e-06	0.000388583
Gh_D08G2556	321.217	1.8077	0.16646	10.8597	1.79333e-27	2.05238e-25	255.262	1.22018	0.286474	4.2593	2.05069e-05	0.00109372
Gh_D09G0023	27.7282	3.97254	0.616531	6.44337	1.16851e-10	2.9794e-09	45.461	1.25731	0.409846	3.06777	0.00215661	0.0412702
Gh_D09G0181	25.962	4.63807	0.734688	6.31298	2.73704e-10	6.59189e-09	34.1592	2.12758	0.642301	3.31243	0.00092489	0.0222045
Gh_D09G0213	54.9904	1.29941	0.335176	3.87679	0.000105844	0.000878886	50.377	1.24123	0.343216	3.61647	0.00029865	0.00924201
Gh_D09G0528	21.2572	4.61656	0.78904	5.85086	4.89049e-09	9.99977e-08	12.1742	2.5248	0.800414	3.15437	0.00160847	0.0334866
Gh_D09G0832	114.056	1.52882	0.222383	6.87471	6.21161e-12	1.84812e-10	155.636	1.63254	0.26664	6.12262	9.20463e-10	1.87422e-07
Gh_D09G0840	181.04	2.08415	0.232413	8.96745	3.0345e-19	1.88856e-17	211.553	1.80032	0.339605	5.30123	1.15022e-07	1.34369e-05
Gh_D09G0943	179.437	4.58672	0.283308	16.1899	5.94245e-59	2.7134e-56	187.337	2.57036	0.840399	3.0585	0.00222449	0.0421251
Gh_D09G0990	146.966	4.87133	0.841646	5.78786	7.12901e-09	1.42224e-07	85.1457	3.66665	0.485552	7.5515	4.30258e-14	2.23191e-11
Gh_D09G1039	15.4154	3.85491	0.808928	4.76545	1.8843e-06	2.42087e-05	9.2684	3.36632	1.03524	3.25172	0.00114709	0.0259199
Gh_D09G1124	76.7668	1.25834	0.260133	4.83731	1.31611e-06	1.74809e-05	58.7389	1.63268	0.370321	4.40882	1.03937e-05	0.000612513
Gh_D09G1479	499.17	1.27881	0.14901	8.58202	9.32216e-18	5.07479e-16	314.384	1.42788	0.235289	6.06862	1.29012e-09	2.54039e-07
Gh_D09G1494	27.423	1.74114	0.42661	4.08134	4.47767e-05	0.000412872	27.2231	1.57703	0.521527	3.02387	0.00249562	0.0458642
Gh_D09G1590	10.7355	2.81401	0.78161	3.60027	0.000317885	0.00229838	12.4408	2.26321	0.752879	3.00608	0.0026464	0.0480276
Gh_D09G2082	151.357	5.08512	0.521932	9.74289	1.97854e-22	1.58382e-20	106.93	2.65601	0.863685	3.07521	0.00210357	0.0406086
Gh_D09G2131	186.839	2.19879	0.196976	11.1628	6.20413e-29	7.56465e-27	192.365	1.49354	0.238936	6.25081	4.08342e-10	8.94125e-08
Gh_D09G2133	23.4674	2.2881	0.513174	4.45871	8.24532e-06	9.20104e-05	28.1291	1.79424	0.496771	3.6118	0.00030408	0.00935732
Gh_D09G2141	55.3573	2.86667	0.340535	8.41814	3.82508e-17	1.97878e-15	37.7097	2.97081	0.476856	6.23	4.66436e-10	1.01117e-07
Gh_D09G2159	70.4506	1.00715	0.274222	3.67274	0.000239962	0.00180044	61.7756	1.35188	0.349637	3.86653	0.000110396	0.00422409
Gh_D09G2274	45.6363	1.51884	0.356199	4.26403	2.00772e-05	0.000202756	34.5606	1.47291	0.48087	3.063	0.00219126	0.0416589
Gh_D09G2307	7.57848	5.37341	1.37149	3.91793	8.93136e-05	0.00075679	3.36058	5.22114	1.69624	3.07807	0.00208349	0.0403972
Gh_D09G2436	230.243	4.73346	0.252025	18.7817	1.06664e-78	1.03761e-75	127.04	2.71985	0.392566	6.92839	4.25656e-12	1.4838e-09
Gh_D10G0004	163.533	1.57807	0.192992	8.17686	2.9133e-16	1.38538e-14	126.931	1.26302	0.405922	3.11149	0.00186149	0.0372076
Gh_D10G0047	15.9779	7.44236	1.29396	5.75163	8.83878e-09	1.73397e-07	13.1082	5.28851	1.18731	4.45418	8.42129e-06	0.000514655
Gh_D10G0166	27.6471	5.01452	0.76805	6.52889	6.62577e-11	1.73996e-09	17.9473	3.87086	0.822596	4.70566	2.53047e-06	0.000186212
Gh_D10G0313	81.5773	1.52514	0.258546	5.89893	3.65877e-09	7.59734e-08	61.8987	1.84711	0.334614	5.52012	3.38763e-08	4.73117e-06
Gh_D10G0376	22.3235	4.18105	0.712618	5.86717	4.43288e-09	9.11292e-08	22.5412	2.73615	0.55492	4.93071	8.19308e-07	7.1832e-05
Gh_D10G0475	34.6156	1.06593	0.382746	2.78495	0.0053536	0.0249493	28.1405	1.72628	0.515171	3.35089	0.000805509	0.0199654
Gh_D10G0490	51.1976	3.2622	0.396479	8.22794	1.90456e-16	9.28382e-15	35.3057	2.30259	0.461909	4.98493	6.1984e-07	5.69808e-05
Gh_D10G0554	28.2678	1.05818	0.414301	2.55412	0.0106456	0.0434721	34.375	1.8261	0.47842	3.81693	0.000135123	0.00495193
Gh_D10G0577	20.9221	2.39175	0.519136	4.60716	4.08204e-06	4.88273e-05	23.118	1.83142	0.512247	3.57526	0.000349882	0.0103448
Gh_D10G0602	35.106	2.27287	0.398223	5.70753	1.14626e-08	2.20046e-07	29.8906	1.69661	0.528485	3.21033	0.00132582	0.0288423
Gh_D10G0614	20.2226	7.78184	1.29127	6.0265	1.6755e-09	3.64489e-08	10.733	4.37701	1.13861	3.84416	0.000120965	0.00453609
Gh_D10G0628	1443.22	1.00336	0.104227	9.62676	6.16398e-22	4.78034e-20	1843.91	1.10758	0.258826	4.27924	1.87534e-05	0.00101385
Gh_D10G0664	16.3244	3.49929	0.762958	4.58648	4.50783e-06	5.33219e-05	14.4732	2.98051	0.8314	3.58493	0.000337165	0.0100497
Gh_D10G0752	37.3415	3.43588	0.490629	7.003	2.50535e-12	7.79079e-11	25.7703	1.62594	0.499443	3.2555	0.00113191	0.0257825
Gh_D10G0755	18.5612	3.50786	0.646608	5.42502	5.79493e-08	9.86729e-07	36.6711	1.83845	0.422772	4.34857	1.37031e-05	0.000768122
Gh_D10G0913	9.24491	4.12315	1.07995	3.81791	0.000134588	0.00108671	5.23167	4.82262	1.54261	3.12628	0.00177033	0.0358293
Gh_D10G0926	11.9408	4.51687	1.00953	4.47424	7.66825e-06	8.62375e-05	9.09577	4.74122	1.25618	3.77432	0.000160443	0.00568719
Gh_D10G1003	21.5938	2.06526	0.480579	4.29744	1.72779e-05	0.000177613	28.208	1.55605	0.464597	3.34925	0.00081032	0.0200505
Gh_D10G1081	29.0838	3.73913	1.00982	3.70275	0.000213271	0.00162497	23.7237	1.88924	0.577707	3.27024	0.00107456	0.0248266
Gh_D10G1140	24.5222	3.04339	0.558118	5.45295	4.95399e-08	8.53934e-07	34.4134	2.1171	0.512992	4.12697	3.67573e-05	0.00176007
Gh_D10G1155	184.855	1.67467	0.195004	8.5879	8.85728e-18	4.83348e-16	223.099	2.64711	0.272226	9.72394	2.38367e-22	3.99485e-19
Gh_D10G1332	31.2019	2.70362	0.491994	5.49524	3.90189e-08	6.83373e-07	16.2737	2.59716	0.764777	3.39597	0.000683869	0.0175669
Gh_D10G1742	9.22223	5.6617	1.33959	4.22644	2.37419e-05	0.000234941	6.01152	6.05813	1.49586	4.04994	5.12314e-05	0.0022939
Gh_D10G1996	689.583	1.8924	0.166181	11.3876	4.82358e-30	6.32978e-28	606.78	1.23053	0.239333	5.14148	2.72581e-07	2.86203e-05
Gh_D10G2008	28.5337	3.3813	0.523056	6.46452	1.01624e-10	2.61198e-09	29.5417	2.45536	0.509098	4.82296	1.41442e-06	0.000115415
Gh_D10G2009	18.8697	3.91575	0.706061	5.5459	2.92438e-08	5.23022e-07	20.4081	2.55456	0.586904	4.3526	1.34535e-05	0.000758373
Gh_D10G2103	10.9173	3.05485	0.806762	3.78655	0.00015275	0.00121538	10.9326	2.69954	0.814539	3.3142	0.00091906	0.0221011
Gh_D10G2113	234.147	4.20818	0.25354	16.5977	7.2366e-62	3.67981e-59	161.114	2.73373	0.337833	8.09195	5.8715e-16	4.41112e-13
Gh_D10G2286	33.4519	2.6244	0.455642	5.75978	8.4224e-09	1.65591e-07	25.7878	1.99915	0.577921	3.45921	0.000541772	0.0147093
Gh_D10G2288	7.70692	5.39405	1.3495	3.99706	6.4134e-05	0.000566608	7.96075	4.55389	1.25481	3.62914	0.000284362	0.00892708
Gh_D10G2460	5.59592	3.35829	1.12829	2.97645	0.00291606	0.0151048	6.29383	4.20205	1.31648	3.19188	0.0014135	0.0303708
Gh_D10G2624	23.8827	2.61994	0.522615	5.01315	5.35465e-07	7.63089e-06	17.8696	2.22044	0.687595	3.22929	0.00124097	0.0274766
Gh_D10G2627	122.566	2.69762	0.251587	10.7224	7.99091e-27	8.91714e-25	113.174	1.75224	0.263964	6.63815	3.17637e-11	9.10572e-09
Gh_D11G0085	16.9144	4.27125	0.791624	5.39555	6.83124e-08	1.15005e-06	17.9073	3.46418	0.711372	4.86971	1.11761e-06	9.40133e-05
Gh_D11G0097	36.2519	3.65826	0.533784	6.85344	7.20944e-12	2.12802e-10	35.4664	3.66234	0.604561	6.05786	1.37948e-09	2.68345e-07
Gh_D11G0102	64.613	7.00481	0.909134	7.70492	1.30921e-14	5.24951e-13	43.4051	4.51691	0.641945	7.03628	1.97435e-12	7.2907e-10
Gh_D11G0232	46.8619	4.49282	0.558019	8.05138	8.18649e-16	3.71908e-14	34.607	3.6116	0.656583	5.50059	3.78517e-08	5.22059e-06
Gh_D11G0247	17.8726	2.03681	0.634352	3.21085	0.00132342	0.00778914	14.9352	2.88656	0.878186	3.28695	0.00101277	0.0238286
Gh_D11G0395	52.5721	4.22947	0.480411	8.80387	1.32175e-18	7.83389e-17	75.508	2.27774	0.474874	4.7965	1.61458e-06	0.00012909
Gh_D11G0492	39.0628	1.25353	0.357525	3.50615	0.000454644	0.00314151	45.4063	2.49693	0.443205	5.6338	1.76282e-08	2.63963e-06
Gh_D11G0869	9.37725	6.67574	1.37669	4.84913	1.24003e-06	1.65936e-05	10.4533	2.58518	0.822001	3.14498	0.00166097	0.0343011
Gh_D11G0923	42.6793	2.11101	0.356741	5.91747	3.26926e-09	6.86176e-08	41.2964	1.36257	0.390671	3.48777	0.000487069	0.0135354
Gh_D11G0956	24.8821	2.24274	0.462617	4.84794	1.24749e-06	1.66784e-05	27.232	2.40027	0.541281	4.43443	9.23179e-06	0.000558703
Gh_D11G0978	41.4974	1.29216	0.339805	3.80264	0.00014316	0.00114744	78.9886	1.05178	0.333921	3.14977	0.00163396	0.0338556
Gh_D11G1039	36.6675	1.5437	0.371343	4.15707	3.22352e-05	0.00030868	61.1084	1.09862	0.34816	3.15552	0.00160214	0.033423
Gh_D11G1058	176.413	1.93505	0.208594	9.27664	1.74906e-20	1.21344e-18	217.201	1.24291	0.258718	4.80413	1.55428e-06	0.000124996
Gh_D11G1074	119.808	6.47008	0.544774	11.8766	1.56553e-32	2.39912e-30	78.6789	2.91108	0.456399	6.37838	1.78972e-10	4.28491e-08
Gh_D11G1150	28.2814	3.47922	0.607899	5.72336	1.04439e-08	2.02051e-07	46.7752	1.45785	0.446334	3.26627	0.00108976	0.0250449
Gh_D11G1193	123.557	1.25067	0.220215	5.6793	1.35244e-08	2.56002e-07	153.411	1.07049	0.302273	3.54148	0.000397894	0.0114366
Gh_D11G1196	12.3788	1.53356	0.60589	2.53108	0.0113712	0.0458497	9.41049	3.75507	0.98526	3.81124	0.000138269	0.00504689
Gh_D11G1291	9.06285	2.14295	0.74885	2.86165	0.00421438	0.0205028	27.346	1.63098	0.501446	3.25255	0.00114376	0.0259199
Gh_D11G1299	303.952	2.03137	0.207045	9.81127	1.00697e-22	8.329e-21	168.319	4.26881	0.71117	6.00251	1.9429e-09	3.60971e-07
Gh_D11G1311	31.2522	4.69254	0.702965	6.67535	2.4664e-11	6.78761e-10	25.5572	2.00013	0.553705	3.61226	0.000303539	0.00934729
Gh_D11G1349	20.7604	2.661	0.606773	4.3855	1.15717e-05	0.000123908	27.8147	2.47519	0.605957	4.08477	4.4121e-05	0.00203012
Gh_D11G1359	29.381	2.81047	0.4541	6.18909	6.05116e-10	1.40009e-08	28.3195	1.67536	0.485167	3.45317	0.000554048	0.0149567
Gh_D11G1450	22.6104	2.6097	0.61532	4.2412	2.22327e-05	0.00022192	17.0866	2.95077	0.782367	3.77159	0.000162209	0.00573488
Gh_D11G1675	23.859	1.74207	0.491991	3.54086	0.000398822	0.00280341	24.4141	1.62088	0.503368	3.22008	0.00128156	0.0280908
Gh_D11G1718	10.5237	3.87909	0.932229	4.16109	3.16735e-05	0.000303821	5.92085	6.03487	1.4773	4.08507	4.40635e-05	0.00203012
Gh_D11G1758	14.1675	6.29138	1.2921	4.8691	1.12109e-06	1.51286e-05	7.86925	3.46696	1.08418	3.19777	0.00138496	0.0299198
Gh_D11G1774	242.389	1.65566	0.164509	10.0642	7.94993e-24	7.14344e-22	196.169	1.49903	0.217696	6.88588	5.7432e-12	1.95511e-09
Gh_D11G1777	20.3358	6.81828	1.27926	5.32985	9.82921e-08	1.60466e-06	14.5102	4.84261	1.01833	4.75542	1.9803e-06	0.000150593
Gh_D11G1914	47.3659	2.06803	0.390734	5.29267	1.20545e-07	1.93046e-06	67.1985	1.78571	0.34985	5.10421	3.32175e-07	3.37394e-05
Gh_D11G1943	32.0699	3.1989	0.525388	6.08865	1.13864e-09	2.52113e-08	51.1403	2.02244	0.44544	4.54033	5.61653e-06	0.000366382
Gh_D11G2038	3.46102	5.23686	1.584	3.30609	0.000946072	0.00584493	5.36674	5.87388	1.58339	3.70968	0.000207523	0.0069612
Gh_D11G2061	32.7679	1.00828	0.392188	2.57092	0.0101427	0.0418196	36.0855	1.70772	0.458613	3.72367	0.000196351	0.006679
Gh_D11G2238	37.9193	1.14673	0.380508	3.01367	0.00258106	0.0136376	96.9816	2.01453	0.285338	7.06016	1.66313e-12	6.30168e-10
Gh_D11G2314	4.28531	5.53578	1.56959	3.52691	0.000420447	0.00293375	5.7037	5.9717	1.50883	3.95784	7.56315e-05	0.00313267
Gh_D11G2384	74.1725	1.1862	0.280683	4.22611	2.37764e-05	0.00023523	73.4703	1.12907	0.313358	3.60314	0.000314394	0.00955994
Gh_D11G2402	888.573	3.51153	0.150478	23.3358	1.9206e-120	8.5943e-117	635.894	2.99382	0.236225	12.6736	8.28243e-37	5.73154e-33
Gh_D11G2448	26.2626	2.54001	0.49992	5.08082	3.758e-07	5.50271e-06	20.4199	2.56801	0.697999	3.6791	0.000234055	0.00762806
Gh_D11G2876	16.6741	2.01089	0.602074	3.33994	0.000837968	0.00525984	9.50707	2.65187	0.833186	3.1828	0.00145856	0.0311546
Gh_D11G3346	31.2607	5.18033	1.17804	4.39739	1.09559e-05	0.000118133	22.5065	2.84791	0.73166	3.89239	9.92616e-05	0.00387913
Gh_D11G3366	11.2547	4.42735	1.08234	4.09054	4.30375e-05	0.000398891	9.64126	2.88097	0.953624	3.02107	0.00251879	0.046242
Gh_D11G3476	10.129	4.28152	1.11466	3.84109	0.000122489	0.00100057	10.4635	3.58679	0.996732	3.59855	0.000319997	0.00969334
Gh_D11G3503	23.909	4.51387	0.703785	6.41371	1.4202e-10	3.58035e-09	69.8993	3.12954	0.860606	3.63644	0.000276432	0.00872211
Gh_D12G0179	24.2968	1.50509	0.433415	3.47262	0.000515406	0.00349869	20.6428	2.08617	0.54771	3.80889	0.000139594	0.0050814
Gh_D12G0199	13.107	3.5964	0.830518	4.33031	1.48901e-05	0.000154918	11.9309	4.10729	0.962884	4.26561	1.99359e-05	0.00106981
Gh_D12G0217	14.645	7.31779	1.2971	5.64164	1.68433e-08	3.13391e-07	11.3857	2.74778	0.759462	3.61807	0.00029681	0.00919857
Gh_D12G0253	13.263	2.81481	0.725063	3.88215	0.000103536	0.000862763	17.239	1.99174	0.613757	3.24516	0.00117383	0.0263788
Gh_D12G0315	72.2509	2.72248	0.298247	9.12827	6.96032e-20	4.60059e-18	79.1777	2.49657	0.321935	7.75491	8.84067e-15	5.42568e-12
Gh_D12G0344	149.701	2.8698	0.240258	11.9447	6.92309e-33	1.087e-30	130.38	2.31583	0.36211	6.39537	1.60156e-10	3.92058e-08
Gh_D12G0392	51.8367	1.57992	0.318835	4.95529	7.22236e-07	1.00838e-05	79.8411	1.98816	0.317491	6.26208	3.79884e-10	8.42372e-08
Gh_D12G0528	2.13011	4.52697	1.72019	2.63166	0.00849685	0.0362284	3.61101	5.32045	1.61126	3.30204	0.000959861	0.0228927
Gh_D12G0690	23.924	3.22533	1.10446	2.92028	0.00349719	0.0175578	22.0767	1.81443	0.581894	3.11815	0.00181989	0.0366281
Gh_D12G0691	28.0495	2.58591	0.565796	4.57039	4.86818e-06	5.70713e-05	35.6993	1.31426	0.434283	3.02626	0.00247595	0.0455808
Gh_D12G0699	11.6926	6.99417	1.34979	5.18166	2.19914e-07	3.35861e-06	9.54086	6.71609	2.18623	3.072	0.00212631	0.0409023
Gh_D12G0712	23.5733	4.05804	0.634482	6.39583	1.59674e-10	3.98943e-09	9.87728	4.26535	1.05668	4.03655	5.4244e-05	0.0023875
Gh_D12G0797	11.3952	5.05422	1.22485	4.12641	3.68467e-05	0.000347265	10.5783	3.91333	1.06039	3.69045	0.000223855	0.00735062
Gh_D12G1270	20.0621	3.8174	0.693554	5.50412	3.71018e-08	6.52094e-07	36.3797	1.80388	0.454475	3.96914	7.21314e-05	0.00302217
Gh_D12G1284	38.7431	5.83976	0.810065	7.209	5.6365e-13	1.905e-11	28.9466	3.32895	0.574707	5.79243	6.93752e-09	1.16268e-06
Gh_D12G1289	24.6613	4.55301	1.10814	4.1087	3.97884e-05	0.000371687	17.5878	2.63454	0.749199	3.51648	0.000437314	0.012359
Gh_D12G1314	130.944	1.91753	0.230524	8.31815	8.93455e-17	4.47708e-15	83.5628	1.35803	0.322434	4.21182	2.53316e-05	0.00130012
Gh_D12G1336	16.9525	5.63917	1.17034	4.81838	1.44728e-06	1.90591e-05	13.0878	3.90347	0.933624	4.18098	2.90249e-05	0.0014372
Gh_D12G1360	8.05661	4.5455	1.21785	3.7324	0.000189661	0.00146732	19.8242	2.45319	0.636561	3.85383	0.000116286	0.00439086
Gh_D12G1365	51.3024	1.97781	0.35419	5.58403	2.35013e-08	4.26974e-07	42.39	1.6178	0.433703	3.7302	0.000191331	0.00653376
Gh_D12G1438	35.5021	4.50171	0.631932	7.12372	1.05052e-12	3.44387e-11	36.6516	1.94982	0.599356	3.2532	0.00114115	0.0259199
Gh_D12G1465	28.7894	1.46883	0.42704	3.43956	0.000582652	0.00387465	43.7263	1.28126	0.419074	3.05736	0.00223294	0.0422412
Gh_D12G1528	27.0838	1.25038	0.416763	3.00021	0.00269795	0.014165	28.7461	1.40419	0.454679	3.08832	0.00201293	0.039423
Gh_D12G1542	61.1213	1.43252	0.359699	3.98255	6.81811e-05	0.000597936	96.6191	1.67298	0.352039	4.75225	2.01161e-06	0.000152442
Gh_D12G1753	167.451	2.63659	0.20668	12.7569	2.85386e-37	5.48088e-35	124.122	2.42704	0.283422	8.56337	1.09618e-17	1.165e-14
Gh_D12G1754	56.7479	2.28639	0.315794	7.24013	4.48262e-13	1.53121e-11	36.6042	3.42745	0.492031	6.96592	3.26271e-12	1.17495e-09
Gh_D12G1934	36.071	2.42415	0.396099	6.12008	9.35306e-10	2.1e-08	19.8257	3.16907	0.63623	4.98101	6.32518e-07	5.7902e-05
Gh_D12G2057	131.224	2.59203	0.263613	9.83273	8.1382e-23	6.79418e-21	149.672	1.54931	0.317311	4.88262	1.04688e-06	8.87481e-05
Gh_D12G2238	7.16526	6.28464	1.36261	4.61222	3.98384e-06	4.77805e-05	10.8508	5.92586	1.41358	4.1921	2.76388e-05	0.00138588
Gh_D12G2333	71.9267	1.63969	0.276922	5.92111	3.19781e-09	6.72125e-08	46.9574	1.21666	0.357473	3.40351	0.000665264	0.0172139
Gh_D12G2373	79.5736	1.91347	0.271792	7.0402	1.91964e-12	6.04505e-11	85.9607	2.14445	0.348155	6.15946	7.29917e-10	1.50737e-07
Gh_D12G2418	189.139	4.073	0.610709	6.6693	2.57022e-11	7.05597e-10	132.167	1.94395	0.321697	6.04278	1.51477e-09	2.87934e-07
Gh_D12G2436	1318.99	2.79405	0.359863	7.76421	8.21535e-15	3.35726e-13	781.08	1.28141	0.290672	4.40842	1.04125e-05	0.000612513
Gh_D12G2466	52.7911	2.16216	0.355706	6.0785	1.21311e-09	2.67805e-08	76.1887	1.11279	0.363072	3.06494	0.00217713	0.0414625
Gh_D12G2534	21.2508	6.88128	1.27275	5.40664	6.42196e-08	1.08688e-06	13.9957	2.76711	0.739317	3.74279	0.000181991	0.00627824
Gh_D12G2672	12.7789	3.31154	0.851211	3.89039	0.000100082	0.000837095	17.3059	2.20134	0.71786	3.06653	0.00216561	0.0413154
Gh_D12G2731	82.8905	3.63839	0.33936	10.7213	8.08287e-27	8.99732e-25	124.9	1.77918	0.287169	6.19559	5.8067e-10	1.2403e-07
Gh_D13G0059	4.99107	4.75078	1.43493	3.3108	0.000930291	0.00575856	16.7529	2.67269	0.691424	3.86549	0.000110868	0.00423398
Gh_D13G0160	208.202	1.61665	0.173927	9.29499	1.47223e-20	1.03259e-18	197.227	2.23399	0.237525	9.40525	5.1909e-21	7.53962e-18
Gh_D13G0217	18.4222	3.8934	0.730842	5.32728	9.9695e-08	1.62556e-06	11.9154	2.20853	0.723921	3.05079	0.00228243	0.0429055
Gh_D13G0266	4.90783	5.7323	1.47436	3.888	0.000101076	0.000844303	8.97515	3.27171	0.976772	3.34952	0.000809524	0.0200422
Gh_D13G0302	20.3892	4.56074	0.839718	5.43128	5.59512e-08	9.55247e-07	17.6616	3.44708	0.777967	4.43088	9.38506e-06	0.000564393
Gh_D13G0305	20.5116	6.82763	1.29505	5.27211	1.34867e-07	2.14084e-06	16.6455	3.75356	0.799453	4.69516	2.66392e-06	0.000194761
Gh_D13G0308	237.212	1.82731	0.240556	7.5962	3.04961e-14	1.17641e-12	71.0863	2.11369	0.411582	5.13554	2.81337e-07	2.9398e-05
Gh_D13G0849	15.0521	3.57977	0.784699	4.56197	5.06767e-06	5.92084e-05	18.2871	2.01197	0.606918	3.31506	0.00091622	0.0220571
Gh_D13G0854	146.736	1.22282	0.191849	6.37388	1.84299e-10	4.55385e-09	201.247	1.2028	0.276402	4.35163	1.35127e-05	0.000760727
Gh_D13G1032	30.0909	3.35372	0.50453	6.64721	2.98695e-11	8.10061e-10	18.6555	2.96407	0.6599	4.49169	7.06598e-06	0.000441021
Gh_D13G1077	9.10901	6.63393	1.33937	4.95302	7.30711e-07	1.01863e-05	6.43216	5.14661	1.42569	3.60992	0.000306289	0.00939788
Gh_D13G1162	29.2889	3.3204	0.507812	6.53864	6.20818e-11	1.63414e-09	29.2512	3.92041	0.594323	6.59643	4.21183e-11	1.19173e-08
Gh_D13G1348	35.3225	5.3678	0.732207	7.33099	2.28456e-13	7.99294e-12	15.96	4.55154	0.896052	5.07955	3.78338e-07	3.75529e-05
Gh_D13G1354	19.5698	5.85069	1.12107	5.21887	1.80021e-07	2.79417e-06	24.2419	2.48802	0.58236	4.27229	1.93472e-05	0.00104207
Gh_D13G1425	29.1868	5.42302	0.905058	5.99191	2.07394e-09	4.47036e-08	23.3183	3.32362	0.764334	4.34838	1.37146e-05	0.000768122
Gh_D13G1544	29.1202	1.19882	0.394874	3.03594	0.00239784	0.0128317	15.1083	1.92533	0.611996	3.14598	0.00165529	0.0342161
Gh_D13G1600	33.7203	5.03117	0.669729	7.51225	5.81215e-14	2.17278e-12	24.9717	2.64109	0.574778	4.59498	4.32792e-06	0.000296051
Gh_D13G1724	164.752	2.31015	0.211497	10.9228	8.9646e-28	1.03656e-25	169.204	3.19944	0.288564	11.0874	1.44352e-28	5.24166e-25
Gh_D13G1732	196.745	1.66272	0.555942	2.99081	0.00278236	0.0145416	234.973	1.16303	0.34601	3.36126	0.000775868	0.0193963
Gh_D13G1762	14.9867	7.35088	1.28882	5.70357	1.17324e-08	2.24552e-07	10.4955	3.90629	1.00048	3.90443	9.44495e-05	0.00372584
Gh_D13G2058	68.1801	1.06175	0.26747	3.96962	7.19879e-05	0.000626715	52.4461	1.5734	0.447461	3.51628	0.000437646	0.012359
Gh_D13G2076	12.4196	7.07479	1.28828	5.49164	3.98211e-08	6.95789e-07	9.35927	4.77748	1.26131	3.7877	0.000152046	0.00544841
Gh_D13G2095	13.4211	2.66106	0.676029	3.93632	8.2741e-05	0.000707934	17.9682	2.56478	0.649978	3.94595	7.94837e-05	0.00326123
Gh_D13G2340	29.7351	3.44368	0.523614	6.57676	4.80819e-11	1.27917e-09	71.5124	3.29233	0.44196	7.4494	9.3765e-14	4.69622e-11
Gh_D13G2360	37.1329	1.98704	0.402549	4.93615	7.96787e-07	1.10317e-05	29.0923	1.61031	0.537398	2.9965	0.00273102	0.0491742
Gh_D13G2361	39.2594	3.34904	0.433863	7.71911	1.17141e-14	4.71386e-13	39.7414	1.76714	0.433433	4.07707	4.56065e-05	0.00207872
Gh_D13G2389	60.9384	3.58879	0.386143	9.29393	1.48691e-20	1.04126e-18	65.8414	1.43351	0.47733	3.00318	0.00267173	0.0483865
Gh_D13G2472	32.0052	1.75334	0.399593	4.38782	1.14494e-05	0.000122834	40.802	1.51092	0.453093	3.33468	0.000853965	0.0208697
Gh_D13G2489	72.0731	1.15639	0.273223	4.2324	2.31216e-05	0.000229666	76.0998	1.72505	0.341114	5.0571	4.2568e-07	4.16822e-05
Gh_D13G2490	189.547	3.25279	0.219363	14.8283	9.60744e-50	3.07081e-47	164.327	3.841	0.35008	10.9718	5.22292e-28	1.6256e-24
Gh_D13G2509	101.796	1.91455	0.238981	8.01131	1.13489e-15	5.08347e-14	135.188	1.47711	0.248438	5.94558	2.75472e-09	5.02234e-07
Gh_Sca004803G06	42.2043	1.74043	0.396674	4.38756	1.14628e-05	0.000122947	95.3728	1.49544	0.29396	5.08721	3.63369e-07	3.63987e-05
Gh_Sca004838G02	19.4045	2.45171	0.534129	4.59012	4.42997e-06	5.24702e-05	141.55	1.25897	0.262114	4.80316	1.56183e-06	0.000125332
Gh_Sca005145G02	98.9207	1.03799	0.227839	4.55582	5.2182e-06	6.06819e-05	96.8597	1.41013	0.332061	4.24661	2.17034e-05	0.0011477
Gh_Sca005252G01	68.6065	1.51054	0.284098	5.31698	1.05502e-07	1.70988e-06	62.3409	1.56381	0.354597	4.41009	1.03326e-05	0.000610896
Gh_Sca005534G01	22.5952	3.8161	0.652416	5.84917	4.94019e-09	1.00896e-07	32.5091	1.68437	0.5098	3.30397	0.00095325	0.0227849
Gh_Sca025643G01	17.1986	5.05669	0.947627	5.33616	9.4936e-08	1.55555e-06	12.117	2.54862	0.792063	3.21769	0.00129227	0.0282677

## Sheet: J11_Z2_all_down
Gene_ID	J11_baseMean	J11_log2FoldChange	J11_lfcSE	j11_stat	J11_pvalue	J11_padj	Z2_baseMean	Z2_log2FoldChange	Z2_lfcSE	Z2_stat	Z2_pvalue	Z2_padj
Gh_A01G0112	10.1099	-3.03278	0.82348	-3.68288	0.000230612	0.00173933	7.7202	-6.41593	1.42516	-4.5019	6.73482e-06	0.000425926
Gh_A01G1658	106.738	-2.68742	0.246016	-10.9238	8.8732e-28	1.02865e-25	27.1395	-2.29976	0.609341	-3.77418	0.000160537	0.00568719
Gh_A01G2149	85.8345	-5.44536	0.480567	-11.3311	9.20264e-30	1.17994e-27	13.3833	-2.26528	0.687998	-3.29256	0.0009928	0.0234728
Gh_A02G0259	628.286	-2.20587	0.153808	-14.3417	1.20022e-46	3.465e-44	383.194	-1.4935	0.283642	-5.26545	1.39844e-07	1.62062e-05
Gh_A02G0260	1236.37	-2.93842	0.146587	-20.0455	2.20992e-89	3.66257e-86	598.344	-1.6638	0.207088	-8.03425	9.41493e-16	6.72534e-13
Gh_A02G0261	1089.3	-2.26353	0.114555	-19.7594	6.66351e-87	9.93929e-84	590.875	-1.8766	0.177765	-10.5566	4.73269e-26	1.21307e-22
Gh_A02G0340	66.0003	-1.5158	0.280287	-5.40802	6.37269e-08	1.07894e-06	50.3722	-1.3373	0.433379	-3.08576	0.00203035	0.0396907
Gh_A02G0596	41.2746	-1.29341	0.35023	-3.69301	0.000221611	0.00168108	33.9624	-1.25762	0.412949	-3.04546	0.00232326	0.0435227
Gh_A02G0744	2033.46	-1.81456	0.105157	-17.2557	1.01395e-66	6.39044e-64	2022.29	-1.0478	0.163399	-6.41254	1.43116e-10	3.56351e-08
Gh_A02G0749	265.002	-1.52789	0.154951	-9.86045	6.17749e-23	5.21567e-21	182.393	-1.04752	0.235742	-4.44351	8.85016e-06	0.000537848
Gh_A02G1337	27.2899	-3.35914	0.509857	-6.5884	4.44578e-11	1.18699e-09	18.611	-2.73852	0.642175	-4.26445	2.00396e-05	0.00107405
Gh_A02G1547	99.5131	-1.58512	0.247797	-6.39685	1.5862e-10	3.96975e-09	57.5204	-1.15716	0.339364	-3.40979	0.000650125	0.016953
Gh_A02G1611	14.8142	-2.11797	0.587335	-3.60606	0.000310883	0.00225285	11.9672	-2.39109	0.733614	-3.25933	0.00111677	0.0255444
Gh_A02G1716	414.215	-2.24324	0.151647	-14.7925	1.63757e-49	5.16043e-47	76.0088	-2.46487	0.342525	-7.1962	6.19151e-13	2.56942e-10
Gh_A03G0209	1520.49	-1.70076	0.108253	-15.711	1.27121e-55	5.07896e-53	1739.23	-1.38114	0.178474	-7.73858	1.0053e-14	6.00069e-12
Gh_A03G0437	954.751	-1.55131	0.30703	-5.05262	4.35785e-07	6.31185e-06	548.669	-1.07438	0.220832	-4.86515	1.14369e-06	9.60213e-05
Gh_A03G1125	91.1681	-2.54128	0.256435	-9.91005	3.76446e-23	3.21473e-21	44.4136	-1.52874	0.415652	-3.67793	0.000235131	0.00765169
Gh_A03G1391	1082.47	-1.66979	0.121939	-13.6936	1.10832e-42	2.78624e-40	954.479	-1.70516	0.208444	-8.18043	2.82835e-16	2.28227e-13
Gh_A03G1495	1575.11	-1.68775	0.104242	-16.1907	5.86236e-59	2.70442e-56	740.476	-1.04663	0.317966	-3.29165	0.000996015	0.0235105
Gh_A03G2147	127.072	-2.25132	0.22105	-10.1847	2.32077e-24	2.17259e-22	136.451	-2.48528	0.758969	-3.27455	0.0010583	0.0245158
Gh_A04G0070	354.545	-1.97187	0.144085	-13.6855	1.24006e-42	3.1e-40	173.577	-1.30479	0.26451	-4.93287	8.10313e-07	7.13305e-05
Gh_A04G0151	117.123	-1.56122	0.21728	-7.18529	6.70641e-13	2.25299e-11	67.6677	-1.16013	0.3802	-3.05136	0.00227807	0.0428737
Gh_A04G0160	150.329	-1.09633	0.192745	-5.688	1.28534e-08	2.4392e-07	98.0844	-1.10986	0.275791	-4.0243	5.71457e-05	0.00249256
Gh_A04G0263	162.191	-2.80632	0.210668	-13.3211	1.74556e-40	4.04717e-38	137.161	-1.82807	0.334577	-5.46382	4.65996e-08	6.24779e-06
Gh_A04G0582	544.595	-2.54312	0.133406	-19.063	5.1281e-81	5.7368e-78	148.688	-1.41476	0.379983	-3.72322	0.000196696	0.00668553
Gh_A04G1040	372.615	-2.20146	0.144097	-15.2776	1.07918e-52	3.86329e-50	426.033	-1.16232	0.290396	-4.00253	6.2668e-05	0.00269565
Gh_A04G1123	1277.69	-1.97938	0.357677	-5.534	3.13016e-08	5.56932e-07	602.729	-1.58745	0.226666	-7.00347	2.49694e-12	9.06681e-10
Gh_A04G1441	37.8862	-4.49421	0.548153	-8.19881	2.42771e-16	1.16687e-14	6.89885	-4.36155	1.33274	-3.27262	0.00106555	0.0246577
Gh_A04G1459	152.239	-1.09199	0.207865	-5.25334	1.49369e-07	2.3469e-06	106.914	-1.59164	0.290688	-5.47543	4.36459e-08	5.94321e-06
Gh_A04G1471	105.072	-4.41699	0.335317	-13.1726	1.26216e-39	2.83815e-37	57.8742	-1.59658	0.379659	-4.20531	2.60724e-05	0.00132256
Gh_A05G0124	106.683	-2.0442	0.238752	-8.56202	1.10902e-17	6.01534e-16	72.2903	-1.20176	0.325968	-3.68675	0.000227133	0.00742469
Gh_A05G0844	71.7158	-1.77041	0.280593	-6.30953	2.79892e-10	6.73367e-09	79.4044	-1.08354	0.293398	-3.69306	0.000221571	0.00729209
Gh_A05G1338	214.671	-2.48596	0.189597	-13.1118	2.81827e-39	6.21242e-37	174.05	-1.83996	0.303218	-6.06811	1.29427e-09	2.54039e-07
Gh_A05G1804	2396.35	-4.66017	0.12169	-38.2955	0	0	638.438	-2.37153	0.265177	-8.9432	3.78066e-19	4.33523e-16
Gh_A05G1967	62.577	-1.1324	0.33294	-3.4012	0.000670896	0.00436228	68.3541	-1.20328	0.332498	-3.61892	0.000295836	0.00919459
Gh_A05G3119	60.16	-1.6636	0.297313	-5.59543	2.20081e-08	4.01639e-07	84.5953	-1.08946	0.35605	-3.05984	0.00221453	0.0419913
Gh_A05G3136	35.5619	-1.7615	0.396391	-4.44383	8.83713e-06	9.77853e-05	49.4333	-1.39134	0.359567	-3.86949	0.000109065	0.00419213
Gh_A06G0123	9898.28	-1.9684	0.114122	-17.2482	1.15345e-66	7.1687e-64	4426.24	-1.37654	0.293676	-4.68727	2.76871e-06	0.000201746
Gh_A06G0183	2299.73	-1.3776	0.118514	-11.6239	3.11637e-31	4.42703e-29	4574.75	-1.43505	0.269492	-5.32502	1.00943e-07	1.21505e-05
Gh_A06G0188	425.104	-1.78684	0.142373	-12.5504	3.95515e-36	7.02321e-34	308.645	-1.15985	0.237507	-4.88342	1.04263e-06	8.85604e-05
Gh_A06G0702	54.8377	-2.50821	0.326596	-7.67987	1.59254e-14	6.32884e-13	47.4252	-1.55358	0.411214	-3.77804	0.000158069	0.00561801
Gh_A06G1529	782.578	-1.22601	0.141598	-8.65835	4.78639e-18	2.71116e-16	435.96	-1.21364	0.265599	-4.56945	4.88996e-06	0.000327304
Gh_A06G1977	183.387	-1.90006	0.2092	-9.08246	1.06144e-19	6.88369e-18	179.278	-1.14529	0.282028	-4.06091	4.88827e-05	0.00220239
Gh_A07G0427	70.2591	-2.82941	0.323152	-8.75567	2.0289e-18	1.18215e-16	56.8522	-1.41621	0.376197	-3.76455	0.000166847	0.00586777
Gh_A07G0973	415.366	-2.3806	0.144331	-16.494	4.0495e-61	1.99129e-58	392.771	-2.13209	0.222156	-9.59723	8.21238e-22	1.23395e-18
Gh_A07G1304	117.97	-1.31136	0.207287	-6.32627	2.51151e-10	6.08803e-09	139.532	-1.24383	0.270361	-4.60064	4.21196e-06	0.000290859
Gh_A07G2002	56.0407	-1.17997	0.288823	-4.08546	4.3989e-05	0.000406951	86.2829	-1.41979	0.281218	-5.04873	4.44751e-07	4.31616e-05
Gh_A07G2014	2248.17	-2.24406	0.118609	-18.9198	7.83342e-80	8.34595e-77	2618.35	-1.38116	0.191393	-7.21635	5.34005e-13	2.24543e-10
Gh_A07G2133	604.773	-1.03558	0.143485	-7.21732	5.30231e-13	1.79612e-11	1336.01	-1.54584	0.225946	-6.84164	7.82915e-12	2.5491e-09
Gh_A08G0106	496.439	-2.95558	0.179061	-16.506	3.32201e-61	1.6517e-58	123.754	-2.89176	0.289119	-10.002	1.4939e-23	3.25476e-20
Gh_A08G0141	48.736	-1.29638	0.337776	-3.838	0.000124042	0.00101159	116.672	-3.73608	0.404264	-9.2417	2.42602e-20	3.30348e-17
Gh_A08G0926	49.8473	-1.02627	0.314406	-3.26416	0.0010979	0.00664621	42.7227	-1.18078	0.383591	-3.07823	0.00208236	0.0403972
Gh_A08G0937	189.161	-3.07664	0.223095	-13.7907	2.89828e-43	7.49666e-41	81.6673	-1.91757	0.381143	-5.0311	4.87675e-07	4.66007e-05
Gh_A08G2028	239.059	-1.77034	0.167621	-10.5616	4.49071e-26	4.79595e-24	173.036	-2.27303	0.312327	-7.27772	3.39503e-13	1.50954e-10
Gh_A08G2234	1505.01	-1.90496	0.312488	-6.09612	1.08671e-09	2.40972e-08	547.79	-1.14289	0.236106	-4.84058	1.29459e-06	0.000107244
Gh_A08G2357	55.2459	-1.67668	0.323567	-5.18186	2.19686e-07	3.35627e-06	115.19	-1.11331	0.34878	-3.19201	0.00141288	0.0303708
Gh_A09G0306	60.3077	-1.08029	0.313955	-3.44092	0.000579741	0.00385952	73.9783	-1.54314	0.363581	-4.24427	2.19302e-05	0.00115409
Gh_A09G0410	374.738	-6.58365	0.321938	-20.4501	5.99698e-93	1.11814e-89	51.5573	-1.79568	0.434379	-4.13389	3.56674e-05	0.00171917
Gh_A09G0463	166.423	-1.04993	0.19806	-5.3011	1.15106e-07	1.85146e-06	48.3173	-1.72379	0.463106	-3.72224	0.000197464	0.00669711
Gh_A09G0534	2308.48	-2.26147	0.117061	-19.3187	3.73749e-83	4.77844e-80	1298.93	-1.16694	0.180132	-6.47823	9.28051e-11	2.40708e-08
Gh_A09G1182	1075.27	-1.52979	0.143602	-10.653	1.68858e-26	1.84294e-24	561.889	-1.3342	0.225013	-5.92946	3.03935e-09	5.42773e-07
Gh_A09G1288	1182.52	-2.03745	0.104515	-19.4943	1.22765e-84	1.71671e-81	754.481	-1.07621	0.207928	-5.17589	2.26822e-07	2.44642e-05
Gh_A09G1509	6104.84	-1.83777	0.128352	-14.3183	1.68261e-46	4.79576e-44	2569.38	-1.78513	0.221239	-8.06877	7.10093e-16	5.15693e-13
Gh_A09G1510	873.558	-3.13755	0.130593	-24.0254	1.5104e-127	9.6553e-124	382.826	-1.40734	0.206582	-6.8125	9.5919e-12	3.05078e-09
Gh_A09G1756	156.969	-1.03491	0.207963	-4.97643	6.47685e-07	9.1083e-06	124.455	-1.1954	0.303295	-3.94139	8.10113e-05	0.00331766
Gh_A09G2051	201.409	-2.60615	0.18878	-13.8052	2.36986e-43	6.20156e-41	96.6243	-1.26975	0.280462	-4.52736	5.97261e-06	0.00038385
Gh_A09G2229	179.546	-1.76848	0.208772	-8.47085	2.4361e-17	1.2855e-15	164.892	-1.89329	0.281106	-6.73514	1.63767e-11	4.99021e-09
Gh_A09G2418	2028.38	-3.08691	0.105928	-29.1416	1.0683e-186	1.1951e-182	2204.42	-2.93946	0.209276	-14.0459	8.16724e-45	2.16299e-40
Gh_A10G0060	36.6143	-1.13774	0.386402	-2.94444	0.00323543	0.0164559	59.38	-1.73633	0.459239	-3.78088	0.000156277	0.00557251
Gh_A10G0299	152.249	-1.72493	0.240557	-7.17057	7.46866e-13	2.49595e-11	47.7402	-1.45962	0.446764	-3.26709	0.0010866	0.0250118
Gh_A10G0321	10.0474	-2.51307	0.779337	-3.22463	0.00126137	0.00748494	8.9449	-6.63037	1.37008	-4.83941	1.30227e-06	0.000107676
Gh_A10G0685	242.987	-3.57497	0.197767	-18.0767	4.86341e-73	4.03015e-70	145.701	-4.44584	0.822618	-5.4045	6.49889e-08	8.32891e-06
Gh_A10G1007	12.5273	-1.93093	0.643959	-2.99852	0.00271291	0.0142346	16.6967	-2.16452	0.639656	-3.38389	0.000714674	0.018137
Gh_A10G1185	181.708	-4.07343	0.245445	-16.5961	7.43791e-62	3.73968e-59	61.78	-1.54509	0.437253	-3.53363	0.000409896	0.0116938
Gh_A10G1507	35.8447	-2.06063	0.389378	-5.29212	1.2091e-07	1.93507e-06	27.0443	-2.34146	0.523112	-4.47602	7.60475e-06	0.000470027
Gh_A10G1509	107.577	-2.56163	0.24863	-10.303	6.82946e-25	6.73224e-23	91.52	-1.15226	0.275284	-4.18573	2.84249e-05	0.00141391
Gh_A10G1587	124.246	-1.92995	0.212627	-9.07668	1.11935e-19	7.23828e-18	43.7614	-1.37433	0.40191	-3.4195	0.000627369	0.0165078
Gh_A10G1590	152.422	-1.27989	0.213718	-5.98868	2.11557e-09	4.55571e-08	203.392	-1.13042	0.370477	-3.05127	0.00227878	0.0428737
Gh_A10G1696	167.876	-2.53589	0.225795	-11.2309	2.87524e-29	3.57392e-27	131.541	-1.02072	0.257722	-3.96053	7.47828e-05	0.00311231
Gh_A10G2147	285.502	-1.8755	0.182748	-10.2628	1.03697e-24	1.00438e-22	485.073	-2.06881	0.248526	-8.32432	8.48114e-17	7.24622e-14
Gh_A10G2166	197.112	-1.80643	0.189318	-9.54181	1.40357e-21	1.06452e-19	81.3419	-1.13636	0.329396	-3.44984	0.000560923	0.0150874
Gh_A11G0020	1311.78	-2.70048	0.284452	-9.4936	2.23189e-21	1.66454e-19	640.123	-2.20185	0.270586	-8.13735	4.04012e-16	3.14364e-13
Gh_A11G0425	33.0176	-1.50887	0.399986	-3.7723	0.00016175	0.00127744	51.116	-1.69062	0.432457	-3.90934	9.25486e-05	0.00366944
Gh_A11G1539	295.929	-2.00278	0.159348	-12.5686	3.14144e-36	5.60052e-34	179.77	-1.09576	0.357218	-3.06748	0.0021587	0.0412738
Gh_A11G2355	84.6094	-1.45359	0.253215	-5.74055	9.43706e-09	1.83844e-07	89.6414	-1.77821	0.32566	-5.46034	4.75221e-08	6.3325e-06
Gh_A12G0498	150.386	-2.05331	0.204653	-10.0331	1.09e-23	9.60146e-22	122.901	-1.56752	0.277296	-5.65289	1.57774e-08	2.38709e-06
Gh_A12G0683	538.537	-1.62178	0.124585	-13.0174	9.74445e-39	2.09637e-36	409.081	-1.91945	0.232759	-8.24652	1.63078e-16	1.34075e-13
Gh_A12G0834	43.7569	-1.87644	0.34415	-5.45238	4.9701e-08	8.56064e-07	50.4272	-1.20964	0.401744	-3.01098	0.00260409	0.0474178
Gh_A12G1448	1066.57	-1.8477	0.338812	-5.45347	4.93966e-08	8.51892e-07	558.508	-1.15392	0.232538	-4.9623	6.96629e-07	6.31079e-05
Gh_A12G1845	41.6096	-1.20185	0.354858	-3.38686	0.000706977	0.00455257	43.8464	-1.24814	0.381331	-3.2731	0.00106374	0.0246287
Gh_A12G2002	68.3108	-2.45833	0.317796	-7.73556	1.02953e-14	4.16916e-13	45.3719	-1.59183	0.388465	-4.09774	4.17212e-05	0.00194434
Gh_A12G2714	201.15	-2.02061	0.192322	-10.5064	8.07132e-26	8.49824e-24	125.41	-1.77171	0.386629	-4.58245	4.59563e-06	0.000311916
Gh_A13G0328	211.674	-2.60308	0.202298	-12.8676	6.85355e-38	1.41983e-35	68.8652	-1.44713	0.329073	-4.39759	1.09462e-05	0.000639524
Gh_A13G0667	390.804	-1.39102	0.147585	-9.42521	4.29254e-21	3.14374e-19	288.489	-1.40853	0.21607	-6.51887	7.08369e-11	1.90534e-08
Gh_A13G1089	38.7529	-1.71742	0.361631	-4.7491	2.04323e-06	2.60189e-05	45.3195	-2.0912	0.416849	-5.01667	5.25738e-07	4.96371e-05
Gh_A13G1348	25.4609	-3.59683	0.578233	-6.22038	4.95943e-10	1.16069e-08	26.9574	-2.82	0.62585	-4.50587	6.61013e-06	0.000420481
Gh_A13G1349	429.817	-3.29076	0.160636	-20.4858	2.88398e-93	5.86602e-90	345.891	-1.059	0.325417	-3.25428	0.00113679	0.0258666
Gh_A13G1564	78.919	-3.49281	0.32269	-10.824	2.64866e-27	2.99298e-25	70.6323	-1.95312	0.329367	-5.92992	3.03091e-09	5.42773e-07
Gh_A13G1612	65.0599	-2.09513	0.348363	-6.01422	1.80751e-09	3.91993e-08	84.0648	-1.15958	0.312392	-3.71194	0.000205677	0.00692596
Gh_A13G2117	601.602	-1.0102	0.132685	-7.61351	2.66746e-14	1.03435e-12	465.386	-1.05246	0.202937	-5.18613	2.14711e-07	2.35663e-05
Gh_D01G0118	12.1866	-5.21012	1.14788	-4.5389	5.65481e-06	6.52842e-05	10.2142	-4.9077	1.21508	-4.03899	5.36817e-05	0.00236836
Gh_D01G0553	941.517	-2.48407	0.117391	-21.1606	2.2025e-99	4.92786e-96	413.757	-1.76511	0.221296	-7.97627	1.50816e-15	1.01102e-12
Gh_D01G0646	164.587	-3.05575	0.219816	-13.9014	6.21331e-44	1.63549e-41	60.883	-1.53196	0.360573	-4.24869	2.15024e-05	0.00113984
Gh_D01G0713	250.527	-1.29617	0.172441	-7.51661	5.62143e-14	2.105e-12	148.144	-1.00683	0.261018	-3.85733	0.000114633	0.00433973
Gh_D01G0913	338.527	-1.86484	0.144989	-12.862	7.36913e-38	1.5196e-35	239.619	-1.32506	0.238148	-5.564	2.63657e-08	3.80417e-06
Gh_D01G0969	673.195	-2.18402	0.126309	-17.2911	5.48779e-67	3.50811e-64	348.641	-1.13218	0.240457	-4.70844	2.49617e-06	0.000184353
Gh_D01G1501	102.664	-1.58682	0.245481	-6.46413	1.01885e-10	2.61719e-09	109.282	-1.21274	0.264748	-4.58073	4.63346e-06	0.000313994
Gh_D01G1930	322.492	-1.34998	0.170077	-7.93744	2.06392e-15	8.93196e-14	373.116	-1.16484	0.19171	-6.07603	1.23194e-09	2.44753e-07
Gh_D01G2178	106.497	-1.17181	0.221629	-5.28726	1.24165e-07	1.9815e-06	105.7	-1.12972	0.304734	-3.70724	0.000209528	0.00699614
Gh_D01G2289	138.232	-1.87092	0.217047	-8.61987	6.70321e-18	3.70773e-16	44.1111	-1.33499	0.40214	-3.31971	0.000901119	0.0217657
Gh_D02G0218	43.9109	-3.31245	0.41512	-7.9795	1.4693e-15	6.51619e-14	6.51128	-4.22615	1.30422	-3.24036	0.00119377	0.0266892
Gh_D02G0229	685.422	-5.81396	0.520812	-11.1633	6.16926e-29	7.54268e-27	109.462	-3.25389	0.371007	-8.77043	1.77979e-18	1.93882e-15
Gh_D02G0336	40.6907	-3.61165	0.443014	-8.15245	3.56619e-16	1.68156e-14	25.8115	-2.54128	0.519069	-4.89584	9.78842e-07	8.34679e-05
Gh_D02G0786	679.747	-1.84906	0.154087	-12.0001	3.54824e-33	5.65041e-31	1268.67	-1.77816	0.244422	-7.27496	3.4652e-13	1.52518e-10
Gh_D02G0790	447.661	-1.74956	0.143192	-12.2182	2.48409e-34	4.10178e-32	358.747	-1.149	0.206055	-5.57617	2.45877e-08	3.59525e-06
Gh_D02G0923	131.512	-1.7941	0.264716	-6.77745	1.22314e-11	3.51078e-10	212.477	-1.18049	0.322229	-3.66353	0.000248765	0.00801753
Gh_D02G1336	150.42	-3.18139	0.231453	-13.7453	5.43431e-43	1.37387e-40	158.709	-1.2844	0.286239	-4.48716	7.218e-06	0.00044803
Gh_D02G1346	96.1894	-1.22156	0.291994	-4.18351	2.8704e-05	0.000278211	87.8666	-1.43677	0.301279	-4.76892	1.85217e-06	0.000142843
Gh_D02G2371	100.155	-1.29203	0.243355	-5.30922	1.10094e-07	1.77915e-06	82.7819	-1.0447	0.330679	-3.15927	0.00158164	0.0330862
Gh_D03G0004	169.162	-4.01226	0.255321	-15.7146	1.20122e-55	4.88655e-53	48.6009	-2.17731	0.391986	-5.55457	2.78299e-08	3.97594e-06
Gh_D03G0135	77.3341	-1.13242	0.252022	-4.49336	7.01085e-06	7.95642e-05	48.9934	-1.30253	0.360986	-3.60825	0.000308272	0.00943721
Gh_D03G1135	1235.18	-1.15371	0.111918	-10.3085	6.45045e-25	6.38594e-23	1195.11	-1.17101	0.206584	-5.66843	1.44116e-08	2.2034e-06
Gh_D03G1797	945.365	-4.34144	0.13791	-31.4803	1.6166e-217	3.6171e-213	359.752	-3.14607	0.225422	-13.9563	2.87863e-44	3.13584e-40
Gh_D03G1856	52.4919	-2.69426	0.369128	-7.29898	2.89961e-13	1.00739e-11	208.433	-1.77921	0.352146	-5.05249	4.36099e-07	4.25113e-05
Gh_D04G0521	18.762	-1.6675	0.56035	-2.97582	0.0029221	0.0151305	20.7865	-1.79249	0.550344	-3.25704	0.0011258	0.0256835
Gh_D04G1494	92.5226	-6.56705	0.625392	-10.5007	8.57462e-26	8.98588e-24	33.5184	-5.65952	0.859447	-6.58508	4.54649e-11	1.25385e-08
Gh_D04G1584	82.7327	-3.56876	0.318376	-11.2093	3.67121e-29	4.52561e-27	74.4729	-1.57166	0.35001	-4.49033	7.11118e-06	0.000442661
Gh_D04G1708	11255.3	-1.26872	0.141306	-8.97853	2.7442e-19	1.71745e-17	10061.1	-1.03123	0.183091	-5.63235	1.77773e-08	2.65283e-06
Gh_D05G0292	47.8294	-1.21572	0.344923	-3.52461	0.000424104	0.00295604	71.9194	-1.5826	0.309916	-5.10654	3.28114e-07	3.34048e-05
Gh_D05G0352	554.995	-1.02885	0.122822	-8.3768	5.43845e-17	2.78125e-15	355.117	-1.19667	0.197707	-6.05273	1.42409e-09	2.74012e-07
Gh_D05G1031	22.2961	-1.31779	0.478626	-2.75328	0.00590021	0.0270238	24.6596	-1.51858	0.48762	-3.11426	0.00184407	0.0369271
Gh_D05G2708	91.2419	-1.32373	0.260276	-5.08588	3.65916e-07	5.36759e-06	46.8919	-1.39128	0.434261	-3.20379	0.00135633	0.029418
Gh_D05G2983	3949.03	-1.3383	0.14228	-9.40606	5.15076e-21	3.75385e-19	1830.4	-1.03366	0.247907	-4.16955	3.05207e-05	0.00149934
Gh_D05G3508	621.156	-1.38569	0.17496	-7.92004	2.37434e-15	1.02062e-13	284.803	-1.11443	0.318832	-3.49535	0.000473445	0.0132073
Gh_D05G3544	353.546	-1.1556	0.139183	-8.30271	1.01766e-16	5.08806e-15	224.051	-1.13293	0.215242	-5.26353	1.41314e-07	1.63332e-05
Gh_D05G3564	190.031	-2.26406	0.198064	-11.431	2.92848e-30	3.90011e-28	90.0865	-1.50357	0.309681	-4.85522	1.20251e-06	0.000100573
Gh_D05G3654	1435.79	-2.50309	0.136324	-18.3613	2.6808e-75	2.44818e-72	902.185	-1.94236	0.282224	-6.88231	5.88883e-12	1.98915e-09
Gh_D05G3657	1426.6	-2.11504	0.106844	-19.7956	3.2509e-87	5.01625e-84	1327.57	-1.41213	0.254625	-5.54591	2.9243e-08	4.15059e-06
Gh_D05G3662	14201	-1.84531	0.148648	-12.4139	2.19566e-35	3.75005e-33	7893.95	-1.20799	0.230388	-5.24327	1.57755e-07	1.79491e-05
Gh_D05G3875	633.136	-1.23069	0.144579	-8.51224	1.70605e-17	9.12096e-16	491.134	-1.53237	0.237061	-6.46401	1.01962e-10	2.61347e-08
Gh_D06G0179	5016.07	-1.37773	0.117808	-11.6948	1.35562e-31	1.9824e-29	13200.4	-1.22775	0.27291	-4.49873	6.83613e-06	0.000431706
Gh_D06G2297	7296.43	-1.39548	0.117249	-11.9019	1.15742e-32	1.78594e-30	3365.33	-1.14787	0.255882	-4.48591	7.26033e-06	0.000450017
Gh_D06G2321	37.458	-1.13579	0.367167	-3.09338	0.00197887	0.0109147	40.836	-1.17599	0.384218	-3.06072	0.00220803	0.0418862
Gh_D06G2339	97.9348	-1.22595	0.245117	-5.0015	5.68854e-07	8.07329e-06	130.147	-1.47323	0.263578	-5.58937	2.2789e-08	3.34346e-06
Gh_D07G0045	578.328	-1.05472	0.129173	-8.16521	3.20869e-16	1.51939e-14	638.007	-1.2164	0.231897	-5.24544	1.55909e-07	1.78779e-05
Gh_D07G0466	293.732	-1.48545	0.187981	-7.90214	2.74147e-15	1.17505e-13	71.9074	-1.25829	0.41287	-3.04766	0.00230627	0.0432788
Gh_D07G1050	578.989	-1.28979	0.123582	-10.4367	1.68582e-25	1.73021e-23	588.867	-1.18293	0.210616	-5.61655	1.94813e-08	2.88734e-06
Gh_D07G2223	50.2511	-1.17738	0.325302	-3.61933	0.000295366	0.00215612	86.1751	-1.21183	0.298895	-4.05436	5.02723e-05	0.00225367
Gh_D07G2235	4213.54	-2.00761	0.112201	-17.893	1.33682e-71	9.64836e-69	4300.55	-1.0875	0.176059	-6.17691	6.53666e-10	1.36319e-07
Gh_D08G0150	378.789	-2.90746	0.168846	-17.2196	1.89397e-66	1.14529e-63	110.214	-2.7952	0.304801	-9.17059	4.70415e-20	6.02879e-17
Gh_D08G0741	148.982	-1.44546	0.200731	-7.20097	5.97874e-13	2.01762e-11	146.223	-1.91513	0.278636	-6.87324	6.27577e-12	2.07567e-09
Gh_D08G1145	42.1925	-3.38492	0.418923	-8.08006	6.47368e-16	2.98336e-14	21.6613	-2.14347	0.685729	-3.12583	0.00177303	0.0358671
Gh_D08G2420	802.056	-1.27438	0.312275	-4.08097	4.48491e-05	0.000413454	501.886	-1.40846	0.228731	-6.15772	7.38018e-10	1.51691e-07
Gh_D08G2429	75.6539	-1.15709	0.251997	-4.59168	4.39702e-06	5.21213e-05	98.1683	-1.22744	0.327327	-3.74989	0.000176911	0.0061473
Gh_D08G2503	251.483	-1.23752	0.183196	-6.75517	1.4267e-11	4.04319e-10	226.261	-1.09459	0.209663	-5.2207	1.78251e-07	1.9997e-05
Gh_D09G0530	1201.51	-2.02275	0.277684	-7.28438	3.23146e-13	1.11403e-11	1164.68	-1.34935	0.193909	-6.95867	3.43505e-12	1.2169e-09
Gh_D09G0920	451.694	-1.65692	0.14211	-11.6594	2.05403e-31	2.95542e-29	424.617	-1.42472	0.185812	-7.66752	1.7535e-14	9.92301e-12
Gh_D09G1520	5491.13	-1.27526	0.146426	-8.70925	3.05892e-18	1.76166e-16	3190.63	-1.20565	0.205904	-5.85539	4.75894e-09	8.26159e-07
Gh_D09G1564	9.99759	-3.8494	0.913495	-4.21392	2.50971e-05	0.000246823	16.3797	-3.3628	0.764749	-4.39726	1.09624e-05	0.000639524
Gh_D09G1582	5953.95	-3.13496	0.104751	-29.9279	8.5458e-197	1.2747e-192	7466.09	-2.65681	0.189728	-14.0032	1.48918e-44	2.16299e-40
Gh_D09G1843	103.374	-2.60874	0.269537	-9.67859	3.71814e-22	2.92921e-20	30.1564	-2.10871	0.537375	-3.9241	8.70555e-05	0.00350264
Gh_D09G2122	212.656	-1.56201	0.208528	-7.49066	6.85272e-14	2.53636e-12	169.228	-1.39755	0.264496	-5.28381	1.26523e-07	1.47409e-05
Gh_D09G2258	725.658	-2.15753	0.124272	-17.3614	1.61837e-67	1.04955e-64	459.481	-1.21926	0.193602	-6.29774	3.0201e-10	6.85406e-08
Gh_D10G0177	206.612	-1.48822	0.169643	-8.77267	1.74478e-18	1.01926e-16	137.046	-1.09236	0.301866	-3.61869	0.000296101	0.0091952
Gh_D10G0701	45.4039	-3.1755	0.395252	-8.03411	9.42612e-16	4.25202e-14	34.0148	-3.35779	0.590262	-5.68864	1.28052e-08	1.99277e-06
Gh_D10G1238	58.3334	-1.64255	0.287487	-5.71349	1.10682e-08	2.13206e-07	66.1838	-1.23749	0.309588	-3.9972	6.40951e-05	0.00274209
Gh_D10G1314	3704.97	-2.75208	0.120814	-22.7795	7.3207e-115	2.5199e-111	1782.18	-1.05801	0.219445	-4.82131	1.42621e-06	0.000115943
Gh_D10G1565	96.6967	-1.85069	0.248547	-7.44604	9.61812e-14	3.51627e-12	62.6252	-1.25538	0.346945	-3.61838	0.000296458	0.0091952
Gh_D10G1752	457.521	-1.45179	0.552513	-2.62761	0.00859873	0.0365618	375.941	-1.13067	0.24778	-4.5632	5.03795e-06	0.00033464
Gh_D10G1843	56.3438	-2.43022	0.322613	-7.53295	4.96077e-14	1.86856e-12	23.6552	-1.83757	0.503137	-3.65222	0.000259984	0.0083215
Gh_D10G2238	415.257	-3.30739	0.438527	-7.54204	4.62674e-14	1.75158e-12	100.564	-1.42138	0.361463	-3.9323	8.41352e-05	0.00340739
Gh_D10G2394	588.635	-1.18998	0.136604	-8.71119	3.00713e-18	1.73406e-16	1079.89	-1.58049	0.234927	-6.7276	1.72484e-11	5.2193e-09
Gh_D11G0837	78.9404	-2.20448	0.294643	-7.48185	7.32836e-14	2.70569e-12	25.7996	-1.76082	0.541671	-3.25071	0.00115117	0.0259903
Gh_D11G0879	47.7588	-1.06597	0.342224	-3.11482	0.00184056	0.0102901	25.9255	-1.75999	0.522164	-3.37058	0.000750106	0.0188931
Gh_D11G1143	535.998	-1.37727	0.136988	-10.0539	8.83016e-24	7.87115e-22	369.912	-1.17017	0.234492	-4.99022	6.03101e-07	5.56769e-05
Gh_D11G1242	347.88	-1.06047	0.148783	-7.1276	1.02133e-12	3.35802e-11	521.402	-1.09538	0.190281	-5.75666	8.57968e-09	1.41076e-06
Gh_D11G1989	433.306	-1.39267	0.137858	-10.1022	5.39892e-24	4.92039e-22	253.907	-1.47737	0.286927	-5.14893	2.61982e-07	2.75739e-05
Gh_D11G2387	114.988	-1.39229	0.241539	-5.76425	8.20234e-09	1.61691e-07	125.838	-1.44677	0.346402	-4.17655	2.9596e-05	0.0014605
Gh_D11G2469	443.769	-1.33429	0.131758	-10.1268	4.20044e-24	3.85957e-22	412.703	-1.27484	0.22072	-5.77584	7.65702e-09	1.27346e-06
Gh_D11G2667	86.6814	-1.56321	0.250877	-6.23096	4.63581e-10	1.09066e-08	62.1274	-1.81445	0.353833	-5.128	2.92838e-07	3.04538e-05
Gh_D12G0132	56.601	-1.91119	0.298753	-6.3972	1.58248e-10	3.96267e-09	31.4529	-1.89435	0.54591	-3.47008	0.000520304	0.0142326
Gh_D12G0146	1398.71	-2.18136	0.161945	-13.4697	2.35691e-41	5.67028e-39	1650.46	-1.41838	0.226003	-6.27593	3.47553e-10	7.80633e-08
Gh_D12G0443	458.88	-1.87283	0.378882	-4.94305	7.69079e-07	1.06745e-05	164.305	-1.10463	0.334093	-3.30635	0.000945201	0.0226174
Gh_D12G0508	2095.4	-1.13359	0.108615	-10.4368	1.68406e-25	1.73021e-23	3101.39	-1.07617	0.21944	-4.90416	9.38302e-07	8.08015e-05
Gh_D12G0598	15.1445	-2.75594	0.640049	-4.30582	1.66366e-05	0.000171533	34.1774	-1.37409	0.448439	-3.06416	0.00218281	0.0415525
Gh_D12G0602	417.414	-1.49995	0.139973	-10.716	8.56314e-27	9.50827e-25	174.663	-1.02758	0.261674	-3.92694	8.60348e-05	0.00346477
Gh_D12G1163	155.327	-2.56121	0.220271	-11.6275	2.98698e-31	4.27033e-29	128.034	-1.42535	0.288705	-4.93704	7.93172e-07	7.02192e-05
Gh_D12G1232	60.9312	-2.50476	0.309805	-8.08496	6.21838e-16	2.87756e-14	30.5481	-2.05003	0.534225	-3.83739	0.00012435	0.0046193
Gh_D12G2364	157.108	-1.29559	0.209624	-6.18054	6.38831e-10	1.47353e-08	161.643	-1.32944	0.248449	-5.35096	8.74906e-08	1.07088e-05
Gh_D12G2670	257.169	-3.22401	0.192253	-16.7696	4.07122e-63	2.2217e-60	500.45	-2.11683	0.305891	-6.92021	4.50981e-12	1.55961e-09
Gh_D13G0367	182.887	-4.33411	0.266104	-16.2873	1.21457e-59	5.78186e-57	49.7512	-2.29209	0.383079	-5.98332	2.18632e-09	4.0028e-07
Gh_D13G0709	2486.94	-2.13408	0.121176	-17.6114	2.01296e-69	1.38578e-66	1786.76	-1.48432	0.164548	-9.02062	1.8703e-19	2.20261e-16
Gh_D13G0782	451.894	-1.32889	0.137351	-9.67513	3.84589e-22	3.02453e-20	236.034	-1.24258	0.217487	-5.71334	1.1078e-08	1.77345e-06
Gh_D13G1632	2374.08	-1.35355	0.0923086	-14.6633	1.10791e-48	3.3273e-46	1991.47	-1.42394	0.263771	-5.39837	6.72486e-08	8.58118e-06
Gh_D13G1635	195.297	-4.72966	0.269457	-17.5525	5.68695e-69	3.79821e-66	17.9755	-2.37243	0.694283	-3.41709	0.00063295	0.0165846
Gh_D13G1652	72.7282	-1.99066	0.277783	-7.16627	7.70708e-13	2.56796e-11	95.1679	-1.09648	0.286023	-3.83352	0.000126323	0.0046806
Gh_D13G1816	23.0683	-2.42381	0.533541	-4.54288	5.54904e-06	6.41292e-05	17.3846	-3.43354	0.696644	-4.9287	8.27802e-07	7.22859e-05
Gh_D13G1818	449.915	-1.08255	0.137442	-7.87641	3.36928e-15	1.43589e-13	631.57	-1.22571	0.225402	-5.43786	5.39246e-08	7.03506e-06
Gh_D13G1902	106.742	-1.63302	0.256358	-6.37005	1.88967e-10	4.65889e-09	132.887	-1.74729	0.278868	-6.26564	3.71285e-10	8.29661e-08
Gh_D13G2158	6282.5	-1.70169	0.141629	-12.0151	2.95948e-33	4.72967e-31	3188.5	-1.07271	0.22082	-4.85784	1.18674e-06	9.94444e-05
Gh_D13G2263	219.216	-1.85489	0.191157	-9.70348	2.91383e-22	2.30775e-20	286.605	-1.3882	0.299065	-4.6418	3.45383e-06	0.00024591
Gh_D13G2451	69.9394	-2.01004	0.280885	-7.15608	8.30184e-13	2.75791e-11	108.419	-1.07743	0.257603	-4.18251	2.88309e-05	0.00143161
Gh_D13G2539	979.57	-1.65523	0.11219	-14.7538	2.90744e-49	9.03487e-47	825.26	-1.37968	0.209384	-6.58925	4.42067e-11	1.24275e-08
Gh_Sca004831G01	7.16886	-3.76452	1.07079	-3.51565	0.000438675	0.00304433	8.03103	-3.99433	1.29125	-3.09338	0.00197887	0.0389465
Gh_Sca004879G03	30.5424	-1.6036	0.391105	-4.10018	4.12836e-05	0.000384626	30.3609	-1.54767	0.493706	-3.1348	0.0017197	0.0351032
Gh_Sca006201G01	515.618	-2.02379	0.351913	-5.75083	8.88062e-09	1.74141e-07	444.674	-1.2522	0.210968	-5.93549	2.92975e-09	5.29713e-07
Gh_Sca007014G01	5909.35	-1.09963	0.153872	-7.14638	8.90987e-13	2.95551e-11	6986.42	-3.03643	0.248286	-12.2295	2.1616e-34	1.17737e-30
Gh_Sca007979G01	122.683	-1.60356	0.214928	-7.46088	8.59462e-14	3.16016e-12	135.162	-1.26685	0.28827	-4.39466	1.10946e-05	0.000643725
