# Supplementary material for: Integrative Analysis of Expression Profiles of mRNA and MicroRNA Provides Insights of Cotton Response to Verticillium dahliae
Source: Int J Mol Sci. 2022 Apr 24;23(9):4702. doi: 10.3390/ijms23094702 (PMC9099760; doi:10.3390/ijms23094702)
Supplement: Supplementary file 1 [file ijms-23-04702-s001.zip › Table S3.WRKY genes differentially expressed in J11 and Z2.xlsx]

## Sheet: DEGs of WRKY  in J11
Row.names	baseMean	log2FoldChange	lfcSE	stat	pvalue	padj	J11_ck_1	J11_ck_2	J11_ck_3	J11_24_1	J11_24_2	J11_24_3
Gh_Sca009206G01	33.1347	-3.48485	1.15782	-3.00985	0.00261381	0.0137791	12.669	17.3463	152.515	3.8451	7.13417	5.299
Gh_A09G0070	6.33836	-3.14135	1.00501	-3.12568	0.00177396	0.0099713	8.77085	13.2648	12.1204	1.92255	0.891771	1.0598
Gh_D09G0376	10.8105	-2.91994	0.803093	-3.63587	0.000277049	0.00204403	10.7199	30.6111	16.1605	0.961275	5.35062	1.0598
Gh_D09G0067	16.7442	-2.53402	0.60234	-4.20695	2.58839e-05	0.000254003	20.4653	28.5704	36.3611	4.80638	1.78354	8.47839
Gh_D06G1651	19.21	-2.21668	0.528201	-4.19666	2.70886e-05	0.000263914	40.9307	26.5296	27.2708	8.65148	4.45885	7.41859
Gh_A05G3283	11.7311	-2.21561	0.670753	-3.30316	0.000956005	0.00589734	22.4144	21.4278	14.1404	1.92255	6.24239	4.2392
Gh_A07G2274	20.5892	-2.21382	0.558273	-3.96548	7.32484e-05	0.000636891	31.1853	30.6111	39.3912	2.88383	3.56708	15.897
Gh_A01G0639	101.633	-1.97989	0.237094	-8.35065	6.78909e-17	3.45225e-15	153.003	178.565	154.535	37.4897	37.4544	48.7508
Gh_D13G0071	235.277	-1.88404	0.209268	-9.00301	2.19621e-19	1.38612e-17	337.191	390.802	381.792	67.2893	93.6359	140.953
Gh_D04G0323	19.3075	-1.80563	0.522641	-3.45482	0.000550655	0.00369981	25.338	30.6111	34.3411	13.4579	8.91771	3.1794
Gh_A10G0638	47.2695	-1.72798	0.344048	-5.02249	5.10055e-07	7.28269e-06	71.1414	71.4259	74.7423	16.3417	16.0519	33.9136
Gh_D04G0470	248.185	-1.65369	0.162932	-10.1496	3.32848e-24	3.07098e-22	341.089	382.639	406.033	115.353	116.822	127.176
Gh_A10G0359	196.353	-1.60243	0.233292	-6.86881	6.47419e-12	1.91952e-10	291.387	285.704	308.06	63.4442	81.1511	148.372
Gh_D10G0757	31.9753	-1.5883	0.403171	-3.93952	8.1645e-05	0.000699627	61.396	43.8759	38.3812	13.4579	12.4848	22.2558
Gh_D10G0367	37.6542	-1.57241	0.380799	-4.12924	3.63959e-05	0.000343378	43.8543	64.2833	60.6019	22.1093	10.7012	24.3754
Gh_A06G1322	46.9081	-1.36004	0.322992	-4.21077	2.54502e-05	0.000250038	57.4978	79.5889	65.652	30.7608	26.7531	21.196
Gh_A03G1081	511.703	-1.26634	0.12947	-9.78098	1.35894e-22	1.10564e-20	761.115	722.422	684.801	272.041	307.661	322.179
Gh_A05G1019	276.586	-1.22536	0.156514	-7.82908	4.91469e-15	2.06694e-13	407.357	353.048	401.993	147.075	178.354	171.687
Gh_D01G0657	189.151	-1.21635	0.183686	-6.62192	3.54568e-11	9.56948e-10	252.406	258.154	282.809	137.462	98.0948	105.98
Gh_A12G2292	642.321	-1.2128	0.133667	-9.07326	1.15506e-19	7.45842e-18	836.155	962.209	892.868	364.323	346.899	451.474
Gh_D02G0605	154.431	-1.21225	0.190065	-6.37806	1.79344e-10	4.43632e-09	206.602	221.42	219.177	78.8246	99.8783	100.681
Gh_D03G0441	196.333	-1.09403	0.183252	-5.97007	2.37149e-09	5.07264e-08	260.202	289.785	251.498	109.585	113.255	153.671
Gh_A05G2237	41.1549	-1.07557	0.334294	-3.21743	0.00129344	0.00764378	50.676	57.1407	59.5919	32.6834	21.4025	25.4352
Gh_A05G1472	101.899	1.0009	0.240907	4.1547	3.25718e-05	0.00031157	75.0395	58.1611	70.7022	158.61	147.142	101.741
Gh_D05G1645	122.015	1.12553	0.218405	5.15339	2.5582e-07	3.86737e-06	76.0141	83.6704	70.7022	185.526	183.705	132.475
Gh_D09G0213	54.9904	1.29941	0.335176	3.87679	0.000105844	0.000878886	25.338	22.4482	47.4715	59.5991	77.584	97.5015
Gh_D05G1137	59.4126	1.3284	0.329878	4.02693	5.65103e-05	0.000508082	46.7779	20.4074	34.3411	102.856	92.7442	59.3488
Gh_D08G0306	54.4053	1.35017	0.313883	4.30151	1.69635e-05	0.000174461	30.2107	35.713	26.2608	77.8633	98.0948	58.289
Gh_A05G3158	30.0963	1.38593	0.39427	3.51517	0.000439472	0.00304844	19.4908	11.2241	19.1906	42.2961	42.805	45.5714
Gh_A08G2488	26.4938	1.39016	0.427806	3.2495	0.00115606	0.0069513	15.5926	13.2648	15.1505	39.4123	49.0474	26.495
Gh_D08G1232	69.024	1.44836	0.286983	5.04684	4.49171e-07	6.4879e-06	38.007	46.937	26.2608	113.43	107.904	81.6045
Gh_A13G1138	56.7117	1.47406	0.307344	4.79613	1.61762e-06	2.11159e-05	27.2871	21.4278	41.4113	85.5535	88.2853	76.3055
Gh_A01G0681	37.0585	1.47717	0.399575	3.69687	0.000218277	0.00165831	27.2871	15.3056	16.1605	76.902	51.7227	34.9734
Gh_A11G0984	24.4181	1.50781	0.449398	3.35516	0.00079318	0.00501251	11.6945	17.3463	9.09028	26.9157	40.1297	41.3322
Gh_A10G2070	37.3499	1.58143	0.358014	4.41725	9.99663e-06	0.000108919	15.5926	18.3667	22.2207	62.4829	53.5062	51.9302
Gh_D05G2642	29.4748	1.72372	0.4127	4.17667	2.95802e-05	0.000285363	15.5926	15.3056	10.1003	41.3348	38.3461	56.1694
Gh_D07G0317	8.34599	1.9921	0.76889	2.59087	0.00957329	0.0399193	1.94908	3.06111	5.05016	10.574	12.4848	16.9568
Gh_A09G2126	6.68683	2.23604	0.865155	2.58455	0.00975057	0.0405162	1.94908	2.04074	3.03009	10.574	9.80948	12.7176
Gh_Sca005029G01	10.3017	2.55894	0.74133	3.45182	0.000556814	0.00373166	4.8727	2.04074	2.02006	13.4579	21.4025	18.0166
Gh_D12G0371	8.72398	2.94367	0.839608	3.50601	0.00045488	0.00314176	0.974539	2.04074	3.03009	13.4579	16.9436	15.897
Gh_A05G0483	90.5079	3.08964	0.281085	10.9919	4.1825e-28	4.91229e-26	16.5672	18.3667	22.2207	173.991	161.41	150.491
Gh_D07G1877	4.92586	3.1563	1.20148	2.62701	0.00861377	0.0366048	1.94908	1.02037	0	15.3804	8.02594	3.1794
Gh_A05G0484	8.6	3.22257	0.888602	3.62656	0.000287223	0.00210286	2.92362	1.02037	1.01003	18.2642	12.4848	15.897
Gh_A12G0294	6.76911	3.64351	1.13065	3.22248	0.00127085	0.00753017	0	3.06111	0	14.4191	17.8354	5.299
Gh_D05G0600	95.1402	4.06868	0.382149	10.6468	1.80398e-26	1.95934e-24	6.82178	17.3463	8.08025	267.234	151.601	119.757
Gh_D05G0601	6.74187	5.18964	1.3738	3.77757	0.000158365	0.00125447	0	1.02037	0	12.4966	8.91771	18.0166

## Sheet: DEGs of WRKY in Z2
Row.names	baseMean	log2FoldChange	lfcSE	stat	pvalue	padj	Z2_ck_1	Z2_ck_2	Z2_ck_3	Z2_24_1	Z2_24_2	Z2_24_3
Gh_A02G0029	20.6303	-1.73386	0.565371	-3.06677	0.00216383	0.0413154	23.4196	45.5407	26.1565	11.4955	12.5586	4.61092
Gh_A02G1301	308.973	-1.19276	0.244369	-4.88096	1.05573e-06	8.9325e-05	591.346	360.089	338.166	189.676	191.968	182.592
Gh_A08G2417	146.981	1.20323	0.269338	4.46737	7.91874e-06	0.00048805	92.7028	62.4861	111.165	237.957	182.997	194.581
Gh_D09G0213	50.377	1.24123	0.343216	3.61647	0.00029865	0.00924201	27.3229	31.7726	30.8273	67.8235	75.3518	69.1638
Gh_A05G1472	82.3324	1.73764	0.359512	4.83333	1.34268e-06	0.000110598	44.8877	22.2408	46.708	83.9172	123.792	172.448
Gh_D05G1137	46.3234	1.84111	0.414456	4.44223	8.90324e-06	0.00054032	24.3955	14.8272	21.4857	44.8325	100.469	71.9303
Gh_D08G1232	33.4611	1.87767	0.486732	3.85771	0.000114453	0.00433668	23.4196	6.35452	13.0782	40.2343	45.7493	71.9303
Gh_D12G2301	22.3482	1.89882	0.54636	3.4754	0.000510097	0.0140451	10.734	7.41361	10.2758	18.3928	44.8523	42.4205
Gh_D05G1645	76.6556	1.96402	0.343565	5.7166	1.08677e-08	1.74742e-06	40.0086	18.0045	35.4981	118.404	100.469	147.549
Gh_A09G0225	17.5364	2.1759	0.696164	3.12555	0.00177472	0.0358742	0	12.709	6.53912	25.2901	39.47	21.2102
Gh_A10G2070	41.0196	2.42833	0.425255	5.71028	1.12792e-08	1.78719e-06	11.7098	12.709	14.0124	87.3658	50.2346	70.086
Gh_A05G0483	69.4251	2.53492	0.458117	5.53335	3.1417e-08	4.41602e-06	39.0327	4.23635	17.749	109.207	95.0868	151.238
Gh_A05G0484	7.96	4.54464	1.26024	3.60617	0.000310752	0.00948229	1.95164	0	0	10.346	17.9409	17.5215
Gh_D07G1877	5.11028	5.82354	1.5244	3.82022	0.000133331	0.00489451	0	0	0	3.44865	16.1468	11.0662
