# Supplementary material for: Integrative Analysis of Expression Profiles of mRNA and MicroRNA Provides Insights of Cotton Response to Verticillium dahliae
Source: Int J Mol Sci. 2022 Apr 24;23(9):4702. doi: 10.3390/ijms23094702 (PMC9099760; doi:10.3390/ijms23094702)
Supplement: Supplementary file 1 [file ijms-23-04702-s001.zip › Table S4.All the miRNAs and DEMs identified in J11 and Z2.xlsx]

## Sheet:  identified miRNAs 
sequence	Family/Source	prediction
TAGAAAGGGAAATAGCAGTTG	miR1508	ref_prediction
AGGGATAGGTAAAACAACTACT	miR1510	ref_prediction
ATTGGAGTGAAGGGAGCT	miR156	ref_prediction
CTGACAGAAGAGAGTGAGCAC	miR156	ref_prediction
CTGACAGAAGATAGAGAGCAC	miR156	ref_prediction
GCTCACTTCTCTTTCTGTCAGC	miR156	ref_prediction
GCTCTCTATGCTTCTGTCATCA	miR156	ref_prediction
TGACAGAAGAAAGTGAGCAC	miR156	ref_prediction
TGACAGAAGAGAGAGAGCACA	miR156	ref_prediction
TGACAGAAGAGAGGGAGCA	miR156	ref_prediction
TGACAGAAGAGAGTGAGCACA	miR156	ref_prediction
TGACAGAAGAGAGTGAGCAC	miR156	ref_prediction
TGACAGAAGAGAGTGAGCACT	miR156	ref_prediction
TGACAGAAGAGAGTGAGTAC	miR156	ref_prediction
TGACAGAAGATAGAGAGCAC	miR156	ref_prediction
TGCTCACCTCTCTTTCTGTCAGT	miR156	ref_prediction
TTGACAGAAGAGAGTGAGCAC	miR156	ref_prediction
TTGACAGAAGATAGAGAGCAC	miR156	ref_prediction
TTGACAGAAGATAGAGAGC	miR156	ref_prediction
TTGACAGAAGATGGAGAGCAC	miR156	ref_prediction
GCTCTCTATGCTTCTGTCATC	miR157	ref_prediction
TCCCAAATGTAGACAAAGCA	miR158	ref_prediction
TCCCAAATGTAGACAAAGC	miR158	ref_prediction
ATTGGAGTGAAGGGAGCTCCG	miR159	ref_prediction
CTTGGATTGAAGGGAGCTCTA	miR159	ref_prediction
CTTGGATTGAAGGGAGCTCT	miR159	ref_prediction
TTTGGACTGAAGGGAGCTCTA	miR159	ref_prediction
TTTGGATTGAAGGGAGCTCTA	miR159	ref_prediction
TTTGGATTGAAGGGAGCTCTC	miR159	ref_prediction
TTTGGATTGAAGGGAGCTCTG	miR159	ref_prediction
TTTGGATTGAAGGGAGCTCTT	miR159	ref_prediction
TTTGGTTTGAAGGGAGCTCTA	miR159	ref_prediction
GCGTATGAGGAGCCAAGCATA	miR160	ref_prediction
TATGAGGAGCCATGCATGTAT	miR160	ref_prediction
TGCCTGGCTCCCTGAATGCCA	miR160	ref_prediction
TGCCTGGCTCCCTGCATGCCA	miR160	ref_prediction
TGCCTGGCTCCCTGGATGCCA	miR160	ref_prediction
TGCCTGGCTCCCTGTATGCCA	miR160	ref_prediction
TGCCTGGCTCCCTGTATGCCATT	miR160	ref_prediction
TGCCTGGCTCCCTGTATGCC	miR160	ref_prediction
TGAAAGTGACTACATCGGGGT	miR161	ref_prediction
TTGAAAGTGACTACATCGGGG	miR161	ref_prediction
GGAGGCAGCGGTTCATCGATC	miR162	ref_prediction
TCGATAAACCTCTGCATCCAG	miR162	ref_prediction
TCGATAAACCTCTGCATCCA	miR162	ref_prediction
TCGATAAACCTCTGCATCCGG	miR162	ref_prediction
TGGAGGCAGCGGTTCATCGATC	miR162	ref_prediction
TTGATAAACCTCTGCATCCAG	miR162	ref_prediction
CACGTGCTCCCCTTCTCCACC	miR164	ref_prediction
CATGTGCCTTGGCTCTCCATC	miR164	ref_prediction
TGGAGAAGCAGGGCACATGCC	miR164	ref_prediction
TGGAGAAGCAGGGCACATGCT	miR164	ref_prediction
TGGAGAAGCAGGGCACGTGAA	miR164	ref_prediction
TGGAGAAGCAGGGCACGTGCAA	miR164	ref_prediction
TGGAGAAGCAGGGCACGTGCA	miR164	ref_prediction
TGGAGAAGCAGGGCACGTGCG	miR164	ref_prediction
TGGAGAAGCAGGGCACGTGC	miR164	ref_prediction
TGGAGAAGCAGGGCACGTGCT	miR164	ref_prediction
TGGAGAAGCAGGGTACGTGCA	miR164	ref_prediction
GGAATGTTGTCTGGATCGAGG	miR165	ref_prediction
TCGGACCAGGCTTCATCCCC	miR165	ref_prediction
TCGGACCAGGCTTCATCCCCC	miR165	ref_prediction
CGGACCAGGCTTCATTCCCC	miR166	ref_prediction
CTCGGACCAGGCTTCATTCCC	miR166	ref_prediction
GGAATGTTGGCTGGCTCGAGG	miR166	ref_prediction
GGAATGTTGTCTGGCTCGAGG	miR166	ref_prediction
GGAATGTTGTCTGGCTCGGGG	miR166	ref_prediction
GGAATGTTGTTTGGCTCGAGG	miR166	ref_prediction
GGACCAGGCTTCATTCCCC	miR166	ref_prediction
GGACTGTTGTCTGGCTCGAGG	miR166	ref_prediction
TATATGATCTCGGACCAGGCT	miR166	ref_prediction
TCGAACCAGGCTTCATTCCCC	miR166	ref_prediction
TCGGACCAGGCTTCATTCCCCC	miR166	ref_prediction
TCGGACCAGGCTTCATTCCCC	miR166	ref_prediction
TCGGACCAGGCTTCATTCCCG	miR166	ref_prediction
TCGGACCAGGCTTCATTCCCGT	miR166	ref_prediction
TCGGACCAGGCTTCATTCCCT	miR166	ref_prediction
TCGGACCAGGCTTCATTCCC	miR166	ref_prediction
TCGGACCAGGCTTCATTCCTA	miR166	ref_prediction
TCGGACCAGGCTTCATTCCTC	miR166	ref_prediction
TCGGACCAGGCTTCATTCCT	miR166	ref_prediction
TCGGACCAGGCTTCATTCCTT	miR166	ref_prediction
TCGGACCAGGCTTCATTCC	miR166	ref_prediction
TCTCGGACCAGGCTTCATTCC	miR166	ref_prediction
TCTCGGACCAGGCTTCATTC	miR166	ref_prediction
TGATGGGAATGTTGTTTGGCT	miR166	ref_prediction
TTGGACCAGGCTTCATTCCCC	miR166	ref_prediction
AGATCATGTGGCAGTTTCACC	miR167	ref_prediction
TAAGCTGCCAGCATGATCTTG	miR167	ref_prediction
TAGGTCATGCTGGTAGTTTCACC	miR167	ref_prediction
TCAGATCATCTTGCAGCTTCA	miR167	ref_prediction
TCAGATGAAGCTGCCAGCATGA	miR167	ref_prediction
TGAAGCTGCCAGCATGATCTAA	miR167	ref_prediction
TGAAGCTGCCAGCATGATCTA	miR167	ref_prediction
TGAAGCTGCCAGCATGATCTC	miR167	ref_prediction
TGAAGCTGCCAGCATGATCTGA	miR167	ref_prediction
TGAAGCTGCCAGCATGATCTGC	miR167	ref_prediction
TGAAGCTGCCAGCATGATCTGG	miR167	ref_prediction
TGAAGCTGCCAGCATGATCTG	miR167	ref_prediction
TGAAGCTGCCAGCATGATCT	miR167	ref_prediction
TGAAGCTGCCAGCATGATCTTA	miR167	ref_prediction
TGAAGCTGCCAGCATGATCTT	miR167	ref_prediction
CCCGCCTTGCATCAACTGAAT	miR168	ref_prediction
TCGCTTGGTGCAGGTCGGGAA	miR168	ref_prediction
TCGCTTGGTGCAGGTCGGGA	miR168	ref_prediction
TCGCTTGGTGCAGGTCGGGAC	miR168	ref_prediction
TCGCTTGGTGCAGGTCGGG	miR168	ref_prediction
TAGCCAAGGATGACTTGCCGG	miR169	ref_prediction
TGATTGAGCCGTGTCAATATC	miR170	ref_prediction
AGATATTGGTGCGGTTCAATT	miR171	ref_prediction
CGAGCCGAATCAATATCACTC	miR171	ref_prediction
CGAGCCGAATCAATATCACT	miR171	ref_prediction
CGATGTTGGTGAGGTTCAATC	miR171	ref_prediction
TATTGGCCTGGTTCACTCAGA	miR171	ref_prediction
TGATTGAGCCGTGCCAATATC	miR171	ref_prediction
TGATTGAGCCGTGCCAATAT	miR171	ref_prediction
TTGAGCCGCGCCAATATCAC	miR171	ref_prediction
TTGAGCCGCGCCAATATCACT	miR171	ref_prediction
TTGAGCCGTGCCAATATCACG	miR171	ref_prediction
TTGAGCCGTGCCAATATCAC	miR171	ref_prediction
AGAATCCTGATGATGCTGCAG	miR172	ref_prediction
AGAATCTTGATGATGCTGCAG	miR172	ref_prediction
AGAATCTTGATGATGCTGCAT	miR172	ref_prediction
AGAATCTTGATGATGCTGCA	miR172	ref_prediction
GCGGCATTATCAAGATTCACA	miR172	ref_prediction
GGAATCTTGATGATGCTGCAT	miR172	ref_prediction
GTAGCATCATCAAGATTCACA	miR172	ref_prediction
GTAGCATCATCAAGATTCAC	miR172	ref_prediction
TGAATCTTGATGATGCTGCAT	miR172	ref_prediction
TAAGTTAAGATTTGTGAAGAA	miR1888	ref_prediction
TAATCTGCATCCTGAGGTTTA	miR2111	ref_prediction
TAATCTGCATCCTGAGGTTTG	miR2111	ref_prediction
TTGCCGATTCCACCCATTCCTA	miR2218	ref_prediction
TATACCGTGCCCATGACTGTAG	miR2947	ref_prediction
TGTGGGAGAGTTGGGCAAGAAT	miR2948	ref_prediction
ACTTTTGAACTGGATTTGCCGA	miR2949	ref_prediction
TCTTTTGAACTGGATTTGCCGA	miR2949	ref_prediction
TGCAAATCCAGTCAAAAGTTA	miR2949	ref_prediction
TGGTGTGCAGGGGGTGGAATA	miR2950	ref_prediction
TTCCATCTCTTGCACACTGGA	miR2950	ref_prediction
AGAGCTTCCTTCAGCCCACTC	miR319	ref_prediction
ATTGGACTGAAGGGAGCTCC	miR319	ref_prediction
CTTGGACTGAAGGGAGCTCCC	miR319	ref_prediction
CTTGGACTGAAGGGAGCTCC	miR319	ref_prediction
CTTGGACTGAAGGGAGCTCCT	miR319	ref_prediction
TGGACTGAAGGGAGCTCCTTC	miR319	ref_prediction
TGGACTGAAGGGGAGCTCCTTC	miR319	ref_prediction
TTGGACTGAAGGGAGCTCCCA	miR319	ref_prediction
TTGGACTGAAGGGAGCTCCC	miR319	ref_prediction
TTGGACTGAAGGGAGCTCCCT	miR319	ref_prediction
TTGGACTGAAGGGAGCTCC	miR319	ref_prediction
TTGGACTGAAGGGAGCTCCT	miR319	ref_prediction
TTGGACTGAAGGGAGCTCCTTC	miR319	ref_prediction
TTGGACTGAAGGGAGCTCCTT	miR319	ref_prediction
TTGGGCTGAAGGGAGCTCCC	miR319	ref_prediction
TCTGTCGCAGGGGAGATGGCTG	miR3267	ref_prediction
TCGGACTGGATTTGTTGACAA	miR3476	ref_prediction
TGAACTGGGTTTGTTGGCTGC	miR3476	ref_prediction
TGAGACCAAATGAGCAGCTGA	miR3522	ref_prediction
AAGCTCAGGAGGGATAGCACC	miR390	ref_prediction
AAGCTCAGGAGGGATAGCGCC	miR390	ref_prediction
AAGCTCAGGAGGGATAGCGTC	miR390	ref_prediction
AGCTCAGGAGGGATAGCGCC	miR390	ref_prediction
CGCTATCCATCCTGAGTTTCA	miR390	ref_prediction
CGCTATCCATCCTGAGTTTC	miR390	ref_prediction
CGCTGTCCATCCTGAGTTTCA	miR390	ref_prediction
ACGGTATCTCTCCTACGTAGC	miR391	ref_prediction
ATCATGCTATCCCTTTGGATT	miR393	ref_prediction
TCCAAAGGGATCGCATTGATCC	miR393	ref_prediction
TCCAAAGGGATCGCATTGATC	miR393	ref_prediction
TTTGACGTGCTCGATCTGCTC	miR3932	ref_prediction
TTGGCATTCTGTCCACCTCC	miR394	ref_prediction
ATGAAGTGTTTGGGGGAACTC	miR395	ref_prediction
CTGAAGTGTTTGGGGGAACTC	miR395	ref_prediction
CTGAAGTGTTTGGGGGGACTC	miR395	ref_prediction
TGAAGTGTTTGGGGGAACTC	miR395	ref_prediction
CACAGCTTTCTTGAACTTTCT	miR396	ref_prediction
CTCAAGAAAGCTGTGGGAGA	miR396	ref_prediction
CTCCACGGCTTTCTTGAACTT	miR396	ref_prediction
GCTCAAGAAAGCTGTGGGAAA	miR396	ref_prediction
GCTCAAGAAAGCTGTGGGAGA	miR396	ref_prediction
GTTCAATAAAGCTGTGGGAAG	miR396	ref_prediction
GTTCAATAAAGCTGTGGGAA	miR396	ref_prediction
TCCACAGCTTTCTTGAACTG	miR396	ref_prediction
TCCACAGGCTTTCTTGAACTG	miR396	ref_prediction
TCCCACGGCTTTCTTGAACTT	miR396	ref_prediction
TTCAATAAAGCTGTGGGAAG	miR396	ref_prediction
TTCCACAGCTTTCTTGAACAG	miR396	ref_prediction
TTCCACAGCTTTCTTGAACGT	miR396	ref_prediction
TTCCACAGCTTTCTTGAACTA	miR396	ref_prediction
TTCCACAGCTTTCTTGAACTG	miR396	ref_prediction
TTCCACAGCTTTCTTGAACTGT	miR396	ref_prediction
TTCCACAGCTTTCTTGAACTT	miR396	ref_prediction
TTCCACAGCTTTCTTGAACT	miR396	ref_prediction
TTCCACGGCTTTCTTGAACC	miR396	ref_prediction
TTCCACGGCTTTCTTGAACTG	miR396	ref_prediction
TTCCACGGCTTTCTTGAACTT	miR396	ref_prediction
ATTGAGTGCAGCGTTGATGAA	miR397	ref_prediction
TCATTGAGTGCAGCGTTGATG	miR397	ref_prediction
CGTGTTCTCAGGTCGCCCCTG	miR398	ref_prediction
GGTGTTCTCAGGTCGCCCCTG	miR398	ref_prediction
TATGTTCTCAGGTCGCCCCTG	miR398	ref_prediction
TGTGTTCCCAGGTCGCCCCTG	miR398	ref_prediction
TGTGTTCTCAGGTCACCCCT	miR398	ref_prediction
TGTGTTCTCAGGTCACCCCTC	miR398	ref_prediction
TGTGTTCTCAGGTCACCCCTG	miR398	ref_prediction
TGTGTTCTCAGGTCACCCCTT	miR398	ref_prediction
TGTGTTCTCAGGTCGCCCCCG	miR398	ref_prediction
TGTGTTCTCAGGTCGCCCCTG	miR398	ref_prediction
TTGTGTTCTCAGGTCACCCCT	miR398	ref_prediction
CGCCAAAGGAGAATTGCCCTG	miR399	ref_prediction
CGCCAAAGGAGAGTTGCCCTT	miR399	ref_prediction
TGCCAAAGGAGAATTGCCCGG	miR399	ref_prediction
TGCCAAAGGAGAATTGCCCTG	miR399	ref_prediction
TGCCAAAGGAGAGCTGCCCTG	miR399	ref_prediction
TGCCAAAGGAGAGTTGCCCTG	miR399	ref_prediction
TGCCAAAGGAGAGTTGCCCTT	miR399	ref_prediction
TGCCAAAGGAGATTTGCCCCG	miR399	ref_prediction
TGCCAAAGGAGATTTGCCCGG	miR399	ref_prediction
TGCCAAAGGAGATTTGCCCTG	miR399	ref_prediction
TTAGATTCACGCACAAACTCG	miR403	ref_prediction
ATGCACTGCCTCTTCCCTGGC	miR408	ref_prediction
CTGCACTGCCTCTTCCCTGGC	miR408	ref_prediction
TGCACTGCCTCTTCCCTGCC	miR408	ref_prediction
TGCACTGCCTCTTCCCTGGC	miR408	ref_prediction
TGCACTGCCTCTTCCCTGGCTG	miR408	ref_prediction
TGCACTGCCTCTTCCCTGGCT	miR408	ref_prediction
TTGGGGACGAGATGTTTTGTTG	miR447	ref_prediction
ACTCTCCCTCAAGGGCTTCTG	miR477	ref_prediction
CGAAGTCTTGGAAGAGAGTAA	miR477	ref_prediction
CGTGATATTGGTTCGGCTCATC	miR479	ref_prediction
CCTACTCCTCCCATTCC	miR482	ref_prediction
TCTTCCCTACACCTCCCATACC	miR482	ref_prediction
TCTTGCCTACTCCACCCATGCC	miR482	ref_prediction
TCTTTCCAATTCCTCCCATTCC	miR482	ref_prediction
TCTTTCCTACTCCACCCATTCC	miR482	ref_prediction
TCTTTCCTACTCCTCCCATACC	miR482	ref_prediction
TCTTTCCTACTCCTCCCATTCC	miR482	ref_prediction
TTCCCAAAACCTCCAATTCCAA	miR482	ref_prediction
TTTCCTATGCCCCCCATTCCAC	miR482	ref_prediction
ACTCATAAGATCGTGACACGT	miR5026	ref_prediction
AGACTACAATTATCTGATCA	miR5083	ref_prediction
AAACCTGGCTCTGATACCA	miR5139	ref_prediction
TCATCTCTCCTCGACTGAA	miR5225	ref_prediction
TGACAACGAGAGAGAGCACGC	miR535	ref_prediction
TGACAACGAGAGAGAGCACGT	miR535	ref_prediction
TTGTTCGATAAAACTGTTGTG	miR5372	ref_prediction
TAGTATAAGGACTAAATTGGT	miR5741	ref_prediction
GTCGTTGTAGTATAGTGG	miR6300	ref_prediction
CCGACCTTAGCTCAGTTGGTG	miR6478	ref_prediction
CTAGTTTGCTCTTTGATCTAATGT	miR7484	ref_prediction
GATTTAACGTATAGGGACTAA	miR7484	ref_prediction
TATCTAACGTGTAGGGACTAA	miR7484	ref_prediction
TTTAACCGTAGAAATGGATGA	miR7484	ref_prediction
TTTACTCTTTGATCTAACGTACA	miR7484	ref_prediction
AAGGAAGCGCTTTGTCCACGTGGA	miR7486	ref_prediction
CGACTTGCTGACGTGGAAGGAAAT	miR7486	ref_prediction
AGTCTAGAAAACTTCACTGACGGT	miR7490	ref_prediction
TGGGATCTTCGAGAGGATTGAGCC	miR7491	ref_prediction
CCATGATCTTTAGCGGCGTTT	miR7492	ref_prediction
CTAAAGATCTGAGCATTAGTGGCG	miR7492	ref_prediction
TCATGGACTTTAGCGGCGTT	miR7494	ref_prediction
TCGTGATCTTTAGCGGTGTTT	miR7494	ref_prediction
TTACTTTAGATGTCTCCTTCA	miR7495	ref_prediction
ATCGAGTTATTCGAGTTAATCGAG	miR7500	ref_prediction
ATATCTGATTCTGACACGAAAAAA	miR7501	ref_prediction
TTTAGCAGTAGAAATAGATGA	miR7502	ref_prediction
AGATCGATGGCTGAACAAGTTAGA	miR7503	ref_prediction
AGGAGGAAAAATCTGATTTGTCAT	miR7504	ref_prediction
AGGAGGAATAAGTCTGATTTGTCA	miR7504	ref_prediction
ATATGAAACTGAGATACCATG	miR7504	ref_prediction
ACAGCTTTAGAAATCATCCCT	miR7505	ref_prediction
TTCAGAAACCATCCCTTCCTT	miR7505	ref_prediction
AAGGTAGTGAAGTAGGCAATTGGG	miR7507	ref_prediction
CAAGAAAAGAAGTCGGGAGAG	miR7508	ref_prediction
AAGGTCATGATCTTTAGCGGCGTT	miR7510	ref_prediction
AGAAGTTTTGCATGTGTAGCTGAG	miR7511	ref_prediction
AATCAGCCAGGAATCGTTTGA	miR7513	ref_prediction
TAACCTGGCTCTGATACCA	miR8155	ref_prediction
GATCCCCGGCAACGGCGCCA	miR8175	ref_prediction
TGCGGGAAGCATTTGCACATG	miR822	ref_prediction
TGTGCAAATGCTTTCTACAGG	miR822	ref_prediction
CCTTCTCATCGATGGTCTAGA	miR824	ref_prediction
TTAGATGACCATCAACAAACA	miR827	ref_prediction
TTAGATGACCATCAACAAACG	miR827	ref_prediction
TTAGATGACCATCAACAAACT	miR827	ref_prediction
TTTGTTTATGGTCATCTAAGC	miR827	ref_prediction
CGGCTCTGATACCAATTGATG	miR845	ref_prediction
TTGAATTGAAGTGCTTGAATT	miR846	ref_prediction
TTCGTTGTCTGTTCGACCTTG	miR858	ref_prediction
TTTCGTTGTCTGTTCGACCTT	miR858	ref_prediction
ATGAGCTAGAAGTTGGAACTC	miR8632	ref_prediction
TAAGTGAAGAAAGAGGTAGGTT	miR8633	ref_prediction
TTGGTATGGAGGATGGAAAAG	miR8634	ref_prediction
TCGGATCTTCAAACGGTGGAG	miR8635	ref_prediction
CGGACCCTCTAACAGTGGAGG	miR8636	ref_prediction
AGGCCCCTGTATTGAGAGTCGGAT	miR8637	ref_prediction
TAAACATAAGTAGAATTAAACAAG	miR8639	ref_prediction
TCTGACAGTGCACTGAAAACG	miR8640	ref_prediction
TTTTTACTTTGGGACACTGATGGC	miR8641	ref_prediction
ACATATTAAGAAGTCGAATTG	miR8643	ref_prediction
TAGTGAGGATGGGAAATTTGT	miR8646	ref_prediction
TTAATGGATCATAACAGCAGGTAT	miR8651	ref_prediction
TTTCCAATAGTTTTATGCCACATC	miR8667	ref_prediction
AAAGTTGGGCCCCTGTTGGTGCGG	miR8670	ref_prediction
AAGAGAAATGATTGTATGAAACAG	miR8672	ref_prediction
AATGAATCTAGGTTCTCTCTT	miR8677	ref_prediction
TCTGGTGTTGAGATAGTTGAC	miR869	ref_prediction
AGGATGTAAAAGAATAGGTGA	miR8695	ref_prediction
AGGCTCTAATGTGGGAACGACTGC	miR8696	ref_prediction
AGGGAAATTGATTCAAGTGAGCAT	miR8697	ref_prediction
AGGGCGACAACGGTTACTGTGATT	miR8700	ref_prediction
AGGGGCTTAGAAAGATGGGAC	miR8701	ref_prediction
AGGTATTGTCTCTGGGGAAGGGTT	miR8702	ref_prediction
ATAAAAACTTTTGAATAATTCAGT	miR8707	ref_prediction
ATGGACGAAATGAAAGTAGAG	miR8714	ref_prediction
ATTTTGGAAGAATTTCAGCTG	miR8718	ref_prediction
CATCGATAGTTTGAGGATGTA	miR8721	ref_prediction
CTAAAATCGAGCATAGACATC	miR8729	ref_prediction
TAGCACTGAAGATGATGATGG	miR8741	ref_prediction
TCCATATTTCACTATCTCTTA	miR8746	ref_prediction
TCTCGGACCCTCAACGGAAGG	miR8749	ref_prediction
TGATGGAGATAGGTATCTGCA	miR8752	ref_prediction
TGCCAAATCAGGGAAGCGAAA	miR8753	ref_prediction
TTAGATTGCATTTTACCCCTT	miR8764	ref_prediction
TTCCATGTCACAGAGATGTTG	miR8768	ref_prediction
TGCCATGTAGGATTGTCGTTA	miR8771	ref_prediction
TTTGATTAGGAAGTTTGAGGATCA	miR8781	ref_prediction
TTTGTACGTGGCGGGAGATAT	miR8783	ref_prediction
CGTTTCACGTCGGGTTCACC	miR894	ref_prediction
AATGTCGAATCAGGATCAACTA	novel-miRNA-1	de novo prediction
ACCTCTGCTTTCGAGTACACCC	novel-miRNA-2	de novo prediction
AGGACCTTGAGGGGAACCCGA	novel-miRNA-3	de novo prediction
CAATGGACCTTCGTCGGCTGTG	novel-miRNA-4	de novo prediction
CAATTGACAACGAGAGAGAGCACG	novel-miRNA-5	de novo prediction
CACAAGGAGTGGATCAAAGATG	novel-miRNA-6	de novo prediction
CACGTGTGATCTGTATGGACGATG	novel-miRNA-7	de novo prediction
CAGAATACCTTTTGTCTAGAA	novel-miRNA-8	de novo prediction
CAGCTGGGCCTGAGACTGCAG	novel-miRNA-9	de novo prediction
CCGACTGGTGCATAACATGGC	novel-miRNA-10	de novo prediction
CCTTCTGATTTCACTCCTGTGTG	novel-miRNA-11	de novo prediction
CGATTGACAAGATAGAGAAGTG	novel-miRNA-12	de novo prediction
CGGAGGTCTATGGAGAACTCAGC	novel-miRNA-13	de novo prediction
CGTGCTCGAGATGATCCAAC	novel-miRNA-14	de novo prediction
CTATGCTGAGCAGGTTTCTGTC	novel-miRNA-15	de novo prediction
CTCACTGAGTCAGACTCGACGGTC	novel-miRNA-16	de novo prediction
CTGTTGTGACGGAAGTTGGAG	novel-miRNA-17	de novo prediction
CTTCCCTTCTTTCAATCGTT	novel-miRNA-18	de novo prediction
CTTCGACTGAAAAACTGAAGCTG	novel-miRNA-19	de novo prediction
CTTGTTAGCTGGCTTACTGAGTT	novel-miRNA-20	de novo prediction
GATCATGTGGCAGTTTCACC	novel-miRNA-21	de novo prediction
GCATTGTTGAGCTTACTGAGC	novel-miRNA-22	de novo prediction
GCTATCGGTTCAGTTGAAGAA	novel-miRNA-23	de novo prediction
GCTGGCTACAGGTTCAGCTGAT	novel-miRNA-24	de novo prediction
GGAAGTGGGGTGCGAGGAAAGA	novel-miRNA-25	de novo prediction
GGAATGGATGATTTCTAAAGC	novel-miRNA-26	de novo prediction
GGGGATGTCAGTTACTTCATCT	novel-miRNA-27	de novo prediction
GGGTTTCTGAACATGGCTTTT	novel-miRNA-28	de novo prediction
GTGATCCACGCCACGGAAA	novel-miRNA-29	de novo prediction
GTGCTCTCTATCGTTGTCATG	novel-miRNA-30	de novo prediction
GTGGACTTGAGAGAGAGAAGG	novel-miRNA-31	de novo prediction
TTCCGGTGGAGCCTGCGGCTT	novel-miRNA-32	de novo prediction
GTTATTCTATTCCACCTCTTAGA	novel-miRNA-33	de novo prediction
TAATGTCGAATCAGGATCAACTA	novel-miRNA-34	de novo prediction
TAGTGCGAGGGGTGGTTGGA	novel-miRNA-35	de novo prediction
TCAGCAAGCTCATCAATGCAA	novel-miRNA-36	de novo prediction
TCAGCAAGCTCGTCAATGCAA	novel-miRNA-37	de novo prediction
TCAGCTGGGCCTGAGACTGCAGG	novel-miRNA-38	de novo prediction
TCGGCCGTGCAAGTCCCGTGGA	novel-miRNA-39	de novo prediction
TCGGGACCCGAAAGATGCGTT	novel-miRNA-40	de novo prediction
TCTCGGTTGAGGACAGCTG	novel-miRNA-41	de novo prediction
TCTGGTTGATGATTGGTGTAT	novel-miRNA-42	de novo prediction
TGAGGGTACTATAATCAAGAC	novel-miRNA-43	de novo prediction
TGCCGTGGAGCTCCGCATAGC	novel-miRNA-44	de novo prediction
TGCTCTCTATCGTTGTCATGTGAT	novel-miRNA-45	de novo prediction
TGCTGGCTACAGGTTCAGCTGATC	novel-miRNA-46	de novo prediction
TGGATCTTCTTGAGGCACCTG	novel-miRNA-47	de novo prediction
TGGGATCTTCTATAGCACCGGA	novel-miRNA-48	de novo prediction
TGTGGTTGGAGATCCTCTCA	novel-miRNA-49	de novo prediction
TTCAGCTTTGCAGATTCCATGGCGC	novel-miRNA-50	de novo prediction
TTCGCAGATTCCATGGCGCT	novel-miRNA-51	de novo prediction
TTTAGAAATCGTTCCTTCCTT	novel-miRNA-52	de novo prediction
TTTGCAGATTCTATGGCGCT	novel-miRNA-53	de novo prediction

## Sheet: DEMs in J11
sequence	sequence	baseMean	log2FoldChange	lfcSE	stat	pvalue	padj	J11_24_1.s.count	J11_24_2.s.count	J11_24_3.s.count	J11_ck_1.s.count	J11_ck_2.s.count	J11_ck_3.s.count
miR156a	TGACAGAAGAGAGTGAGCAC	231.004	1.13215	0.435245	2.60119	0.0092902	0.0383897	223	376	356	232	106	133
miR157	TTGACAGAAGATAGAGAGC	28.5632	1.21837	0.548503	2.22126	0.0263332	0.0791883	35	41	44	27	13	16
miR160b	TGCCTGGCTCCCTGTATGCC	85.1568	1.17338	0.482291	2.43292	0.0149774	0.053789	142	129	86	78	43	44
miR164	TGGAGAAGCAGGGCACGTGCA	660.491	1.73838	0.519345	3.34724	0.000816193	0.00601513	938	1628	506	441	183	383
miR165	TCGGACCAGGCTTCATCCCCC	12.768	-3.09728	0.873912	-3.54416	0.000393871	0.00336182	1	3	4	32	15	27
miR166d	TCGGACCAGGCTTCATTCC	85.4461	1.54729	0.45941	3.368	0.00075715	0.00567027	172	119	96	62	29	51
miR167b	TCAGATCATCTTGCAGCTTCA	30.6647	2.28354	0.756853	3.01715	0.00255162	0.0146129	38	73	44	32	1	11
miR168	TCGCTTGGTGCAGGTCGGGAA	49.2491	1.20117	0.543242	2.21111	0.0270282	0.0803893	67	97	43	49	22	27
miR2947	TATACCGTGCCCATGACTGTAG	480.012	-1.19467	0.429517	-2.78142	0.0054122	0.025807	373	339	176	1101	356	843
miR2949	ACTTTTGAACTGGATTTGCCGA	359.253	1.75724	0.448929	3.9143	9.06669e-05	0.0010206	404	756	513	355	69	188
miR319c	CTTGGACTGAAGGGAGCTCCC	24.806	-2.71099	0.776676	-3.4905	0.000482114	0.00396321	11	8	1	56	28	54
miR319a	TTGGACTGAAGGGAGCTCCC	683.182	-1.48376	0.357699	-4.14807	3.35294e-05	0.000446797	374	383	333	1493	719	1025
miR3476	TCGGACTGGATTTGTTGACAA	57.0371	2.10948	0.585681	3.60176	0.000316067	0.00282112	63	140	77	54	9	19
miR395	CTGAAGTGTTTGGGGGAACTC	409.935	1.65644	0.543246	3.04915	0.00229489	0.0134572	466	1088	322	369	111	211
miR396b	TTCAATAAAGCTGTGGGAAG	12.117	2.14227	0.853675	2.50947	0.0120914	0.0463929	14	29	17	7	1	8
miR396a	TTCCACAGCTTTCTTGAACTG	4425.94	-1.17467	0.398594	-2.94704	0.00320836	0.017427	2626	3671	1926	9683	3785	7020
miR396c	GTTCAATAAAGCTGTGGGAAG	24.7011	2.95798	0.776976	3.80704	0.000140639	0.00146444	21	74	37	13	2	6
miR398d	TGTGTTCTCAGGTCACCCCT	2.89746	3.18395	1.58376	2.01037	0.0443917	0.111145	4	6	6	1	0	1
miR398a	TGTGTTCTCAGGTCACCCCTT	14.9717	2.33311	1.13945	2.04758	0.0406013	0.105402	11	59	4	3	6	4
miR399	TGCCAAAGGAGAGTTGCCCTG	11.0787	2.6045	0.886337	2.9385	0.00329805	0.0177889	13	25	19	3	2	5
miR403	TTAGATTCACGCACAAACTCG	116.099	1.40725	0.421018	3.34249	0.000830317	0.00609479	135	198	176	125	39	58
miR7484	TATCTAACGTGTAGGGACTAA	5.93243	6.0684	1.57422	3.85485	0.000115799	0.00124938	13	11	12	0	0	0
miR7495	TTACTTTAGATGTCTCCTTCA	21.6307	2.23618	0.733033	3.05059	0.00228391	0.0134062	21	51	35	16	6	4
miR7505	ACAGCTTTAGAAATCATCCCT	450.565	2.0819	0.47471	4.38562	1.15655e-05	0.000183331	537	942	717	280	143	124
miR8746	TCCATATTTCACTATCTCTTA	53.3185	1.40299	0.646388	2.17051	0.0299684	0.0863744	84	117	34	42	11	49
novel-miRNA-52	TTTAGAAATCGTTCCTTCCTT	161.057	1.26224	0.524099	2.4084	0.0160225	0.0565784	223	345	119	139	69	96
novel-miRNA-12	CGATTGACAAGATAGAGAAGTG	10.7472	2.36406	0.975626	2.42313	0.0153876	0.0548902	10	18	27	9	0	5
novel-miRNA-40	TCGGGACCCGAAAGATGCGTT	580.929	-2.44023	0.447404	-5.45419	4.91968e-08	1.68175e-06	177	154	216	1182	823	935
novel-miRNA-42	TCTGGTTGATGATTGGTGTAT	19.7508	1.41579	0.66057	2.14329	0.0320901	0.0903246	27	23	36	12	9	12
novel-miRNA-45	TGCTCTCTATCGTTGTCATGTGAT	38.737	2.02941	0.638457	3.17861	0.00147983	0.00960126	46	86	57	44	5	12

## Sheet: DEMs in Z2
sequence	sequence	baseMean	log2FoldChange	lfcSE	stat	pvalue	padj	Z2_24_1.s.count	Z2_24_2.s.count	Z2_24_3.s.count	Z2_ck_1.s.count	Z2_ck_2.s.count	Z2_ck_3.s.count
miR159b	TTTGGATTGAAGGGAGCTCTT	32.9533	2.01691	0.655651	3.0762	0.00209658	0.0160417	66	74	39	16	6	21
miR162a	TCGATAAACCTCTGCATCCAG	192.506	1.42457	0.674986	2.11052	0.0348137	0.109591	448	396	147	35	80	226
miR164	TGGAGAAGCAGGGCACGTGCA	573.268	1.4009	0.558121	2.51003	0.0120721	0.0557781	1060	925	754	165	253	572
miR166b	TCGGACCAGGCTTCATTCCCG	2809.27	1.02027	0.51451	1.98299	0.0473688	0.134168	4983	4178	3311	1176	1529	3001
miR166c	TCGGACCAGGCTTCATTCCCT	8.64778	2.25707	1.08826	2.07401	0.0380783	0.115956	30	16	6	5	2	2
miR166d	GGAATGTTGTCTGGCTCGAGG	84.9406	1.71728	0.57407	2.99142	0.00277681	0.0197341	149	189	98	33	36	47
miR167d	TGAAGCTGCCAGCATGATCTGG	78.8242	1.45836	0.617147	2.36308	0.018124	0.0728172	229	92	82	28	31	75
miR167c	TGAAGCTGCCAGCATGATCTTA	30.9871	1.60249	0.704421	2.27491	0.0229114	0.0847491	63	54	39	8	10	33
miR167a	TGAAGCTGCCAGCATGATCTC	154.962	1.52485	0.601629	2.53454	0.0112596	0.0532405	285	268	205	37	66	148
miR171b	CGAGCCGAATCAATATCACTC	3.13605	3.98215	1.96557	2.02595	0.0427695	0.125133	11	2	6	0	1	0
miR171a	TGATTGAGCCGTGCCAATATC	46.05	2.05134	0.638038	3.21507	0.00130413	0.011193	96	75	71	12	16	26
miR2949	ACTTTTGAACTGGATTTGCCGA	429.006	2.00285	0.532898	3.7584	0.000171003	0.00228476	832	671	709	118	117	320
miR2950	TTCCATCTCTTGCACACTGGA	59.7236	2.14417	0.732802	2.92599	0.0034336	0.0229939	140	147	53	7	24	33
miR3476	TCGGACTGGATTTGTTGACAA	69.9342	1.80458	0.750432	2.40473	0.0161846	0.0676156	180	123	73	7	32	54
miR397	ATTGAGTGCAGCGTTGATGAA	4.81329	3.99092	1.65549	2.41073	0.0159208	0.0669218	16	13	4	0	0	2
miR398c	TGTGTTCTCAGGTCGCCCCTG	7630.01	2.76285	0.572763	4.82373	1.40899e-06	4.49966e-05	29160	14704	5127	2124	1372	2530
miR398e	GGTGTTCTCAGGTCGCCCCTG	17.8093	2.67159	1.18012	2.26382	0.0235851	0.086105	83	37	1	10	2	3
miR398b	TGTGTTCTCAGGTCACCCCTG	8.98649	2.1938	1.10789	1.98015	0.0476865	0.134814	34	13	7	1	2	8
miR398a	TGTGTTCTCAGGTCACCCCTT	20.213	3.85186	0.936353	4.11368	3.89403e-05	0.000693681	37	47	38	4	0	5
miR398e	TGTGTTCTCAGGTCGCCCCCG	16.4856	2.39777	0.994178	2.41181	0.0158734	0.066795	44	16	30	12	2	2
miR403	TTAGATTCACGCACAAACTCG	85.2167	1.45837	0.631812	2.30823	0.0209862	0.0801839	168	170	87	23	47	61
miR408a	ATGCACTGCCTCTTCCCTGGC	230.591	2.31987	0.525534	4.41432	1.01329e-05	0.00023137	523	482	293	51	60	130
miR408b	TGCACTGCCTCTTCCCTGGC	60.1695	2.56935	0.723009	3.55368	0.000379879	0.00430642	84	122	115	7	18	26
miR408c	TGCACTGCCTCTTCCCTGGCT	39.1111	3.87185	0.889327	4.35369	1.33867e-05	0.000291289	29	100	91	2	4	10
miR7505	ACAGCTTTAGAAATCATCCCT	425.83	1.47284	0.642058	2.29394	0.0217941	0.0819656	789	948	407	83	158	511
miR7508	CAAGAAAAGAAGTCGGGAGAG	37.1125	1.72548	0.764979	2.25559	0.0240962	0.0873508	90	63	41	7	22	17
miR827a	TTAGATGACCATCAACAAACA	34.656	1.84491	0.690287	2.67267	0.007525	0.0404257	80	56	45	10	16	17
miR827b	TTTGTTTATGGTCATCTAAGC	34.9989	2.32581	0.787455	2.95358	0.00314111	0.0215659	64	82	47	3	13	18
miR858	TTCGTTGTCTGTTCGACCTTG	28.0842	1.39293	0.706821	1.9707	0.0487583	0.13696	43	57	34	9	13	26
miR8646	TAGTGAGGATGGGAAATTTGT	88.3865	1.3445	0.61539	2.18479	0.0289041	0.097681	213	161	72	27	42	86
miR8677	AATGAATCTAGGTTCTCTCTT	18.4744	2.37328	0.881005	2.69384	0.00706347	0.0386446	17	56	27	5	3	12
novel-miRNA-52	TTTAGAAATCGTTCCTTCCTT	166.332	1.59565	0.625633	2.55046	0.0107579	0.0517004	383	299	176	34	59	180
novel-miRNA-32	TTCCGGTGGAGCCTGCGGCTT	70.1322	-2.43328	0.680826	-3.57402	0.000351546	0.0040472	25	18	26	115	118	89
novel-miRNA-33	GTTATTCTATTCCACCTCTTAGA	17.835	1.9795	0.831339	2.38109	0.0172613	0.0705904	46	33	19	3	7	12
novel-miRNA-40	TCGGGACCCGAAAGATGCGTT	1126.94	-3.31764	0.710644	-4.6685	3.03411e-06	8.53841e-05	321	357	67	2257	2110	1029
novel-miRNA-42	TCTGGTTGATGATTGGTGTAT	27.8139	-2.04872	0.844425	-2.42618	0.0152588	0.0651317	7	19	9	27	54	35
