# Supplementary material for: Integrative Analysis of Expression Profiles of mRNA and MicroRNA Provides Insights of Cotton Response to Verticillium dahliae
Source: Int J Mol Sci. 2022 Apr 24;23(9):4702. doi: 10.3390/ijms23094702 (PMC9099760; doi:10.3390/ijms23094702)
Supplement: Supplementary file 1 [file ijms-23-04702-s001.zip › Table S5.DEMs and their corresponding targets extracted from RNA sequencing for network in J11 and Z2.xlsx]

## Sheet: network in J11
miRNA	targets
miR165	Gh_D05G0975;Gh_A13G2011
miR396a	Gh_A05G2252；Gh_D12G2219；Gh_D05G2512；Gh_D03G0527
novel-miRNA-40	Gh_A13G2011;Gh_A13G0138;Gh_D13G0160;Gh_D11G1305;Gh_D02G1480
novel-miRNA-42	Gh_D09G1208；Gh_A09G1979；Gh_D11G1663
miR398a	Gh_D12G2631;Gh_A12G2504
miR398d	Gh_D12G2631;Gh_A12G2504
miR395	Gh_D09G2130;Gh_D02G0399;Gh_A02G0333
miR157	Gh_A05G2337

## Sheet: network in Z2
miRNA	targets
novel-miRNA-32	Gh_A10G0583;Gh_D10G0628;Gh_A03G1683;Gh_D02G0732
novel-miRNA-40	Gh_A13G0138;Gh_D13G0160;Gh_D02G1480
miR166d	Gh_A06G0702
