# Supplementary material for: Integrative Analysis of Expression Profiles of mRNA and MicroRNA Provides Insights of Cotton Response to Verticillium dahliae
Source: Int J Mol Sci. 2022 Apr 24;23(9):4702. doi: 10.3390/ijms23094702 (PMC9099760; doi:10.3390/ijms23094702)
Supplement: Supplementary file 1 [file ijms-23-04702-s001.zip › Table S6.Primers used in this work.xlsx]

## Sheet: Sheet1
primers for RT-PCR	forward 5'-3'	reverse 5'-3'
Gh_D09G0840	TGTCAACGTCCGAACATTAG	GTGATACGCTGGAGGATTTA
Gh_A03G0291	TTTTCCGACGATTCATACAC	CTTTACCGCAACCATCTCAT
Gh_A03G1239	GGTAAGGCTGGATTGGAGAAG	GTGAAACAGGTGATGGTCGTG
Gh_A05G3963	AACCAAGTGCCTTCCTATCCT	CGTCGTCCGAATCATCCTCAA
Gh_A07G2341	AAAACAATACCAACCGAGTC	CATCACCTTGCTGCTACACC
Gh_D02G0923	TGTGGATGTTTCAACGGAGGA	CAGCAGCTTCGCGTACCTTAT
Gh_D04G1399	GCCCTGGAAGTATCGTAAAG	AGCTGCCTCAAACTTGTTGT
Gh_D13G1816	GTATCGGCGGCAGCCCAAAGT	ATCCCATGTGGCGCAGAAAGC
REV (Gh_A13G2011)	ATAACCCTGCTGGACTCCTCT	ATGGCAAATATCCCAACTGAA
APS1 (Gh_D02G0399)	CAATGGGTTCACGTTTTGAGT	GACCGACATATTGACGAAGGA
APS3 (Gh_D09G2130)	TGGGTCCATGTTTTGAGTGA	GAAAGAACCATCGCCGAGTC
U6	GCACTTTATTGGTCCATCATCC	GACACCTGGCTCTTTTTGATTC
primers for stem loop RT-PCR	5'-3'
miR160b-RT	GTCGTATCCAGTGCAGGGTCCGAGGTATTCGCACTGGATACGAC GGCATA
miR160b-FP	GCGGCG TGCCTGGCTCCCTG
miR395-RT	GTCGTATCCAGTGCAGGGTCCGAGGTATTCGCACTGGATACGAC GAGTTC
miR395-FP	GCGGCG CTGAAGTGTTTGGGG
miR164-RT	GTCGTATCCAGTGCAGGGTCCGAGGTATTCGCACTGGATACGAC TGCACG
miR164-FP	GCGGCG TGGAGAAGCAGGGCA
miR166d-RT	GTCGTATCCAGTGCAGGGTCCGAGGTATTCGCACTGGATACGAC GGAATG
miR166d-FP	GCGGCG TCGGACCAGGCTT
miR398a-RT	GTCGTATCCAGTGCAGGGTCCGAGGTATTCGCACTGGATACGAC AAGGGG
miR398a-FP	GCGGCG TGTGTTCTCAGGTCA
miR403-RT	GTCGTATCCAGTGCAGGGTCCGAGGTATTCGCACTGGATACGAC CGAGTT
miR403-FP	GCGGCG TTAGATTCACGCACA
miR7505-RT	GTCGTATCCAGTGCAGGGTCCGAGGTATTCGCACTGGATACGAC AGGGAT
miR7505-FP	GCGGCG ACAGCTTTAGAAATC
novel-miRNA-40-RT	GTCGTATCCAGTGCAGGGTCCGAGGTATTCGCACTGGATACGAC AACGCA
novel-miRNA-40-FP	GCGGCG TCGGGACCCGAAAGA
Universal-R	GTGCAGGGTCCGAGGT
primers for 5' RLM-RACE	5'-3'
RACE Outer Primer	GCTGATGGCGATGAATGAACACTG
RACE Inner Primer	CGCGGATCCGAACACTGCGTTTGCTGGCTTTGATG
APS1-GSP-R1	GCCATGCTCAAGACCTTCTTCCCATG
APS1-GSP-R2	CATCTCGAGAAGCCGCCGATGAGTATC
APS3-GSP-R1	GATCCGAGCTTTAGCATGCCACTGCAC
APS3-GSP-R2	CTGAGCTGGAATGCAAACACAGCATC
REV-GSP-R1	TGCCTTTGCACATAGAACACCCCCGAG
REV-GSP-R2	TAGCCACTAGGAAGCACTTCAGCTCTC
